# Supplementary material
Source: PubMed Central journal article supplement (PMC2547886)
Supplement: NIHMS64155-supplement-2si20070929_07.pdf [file NIHMS64155-supplement-2si20070929_07.pdf]

Hybrid.13C.175.MHz.5.21.07

Pulse Sequence: s2pul

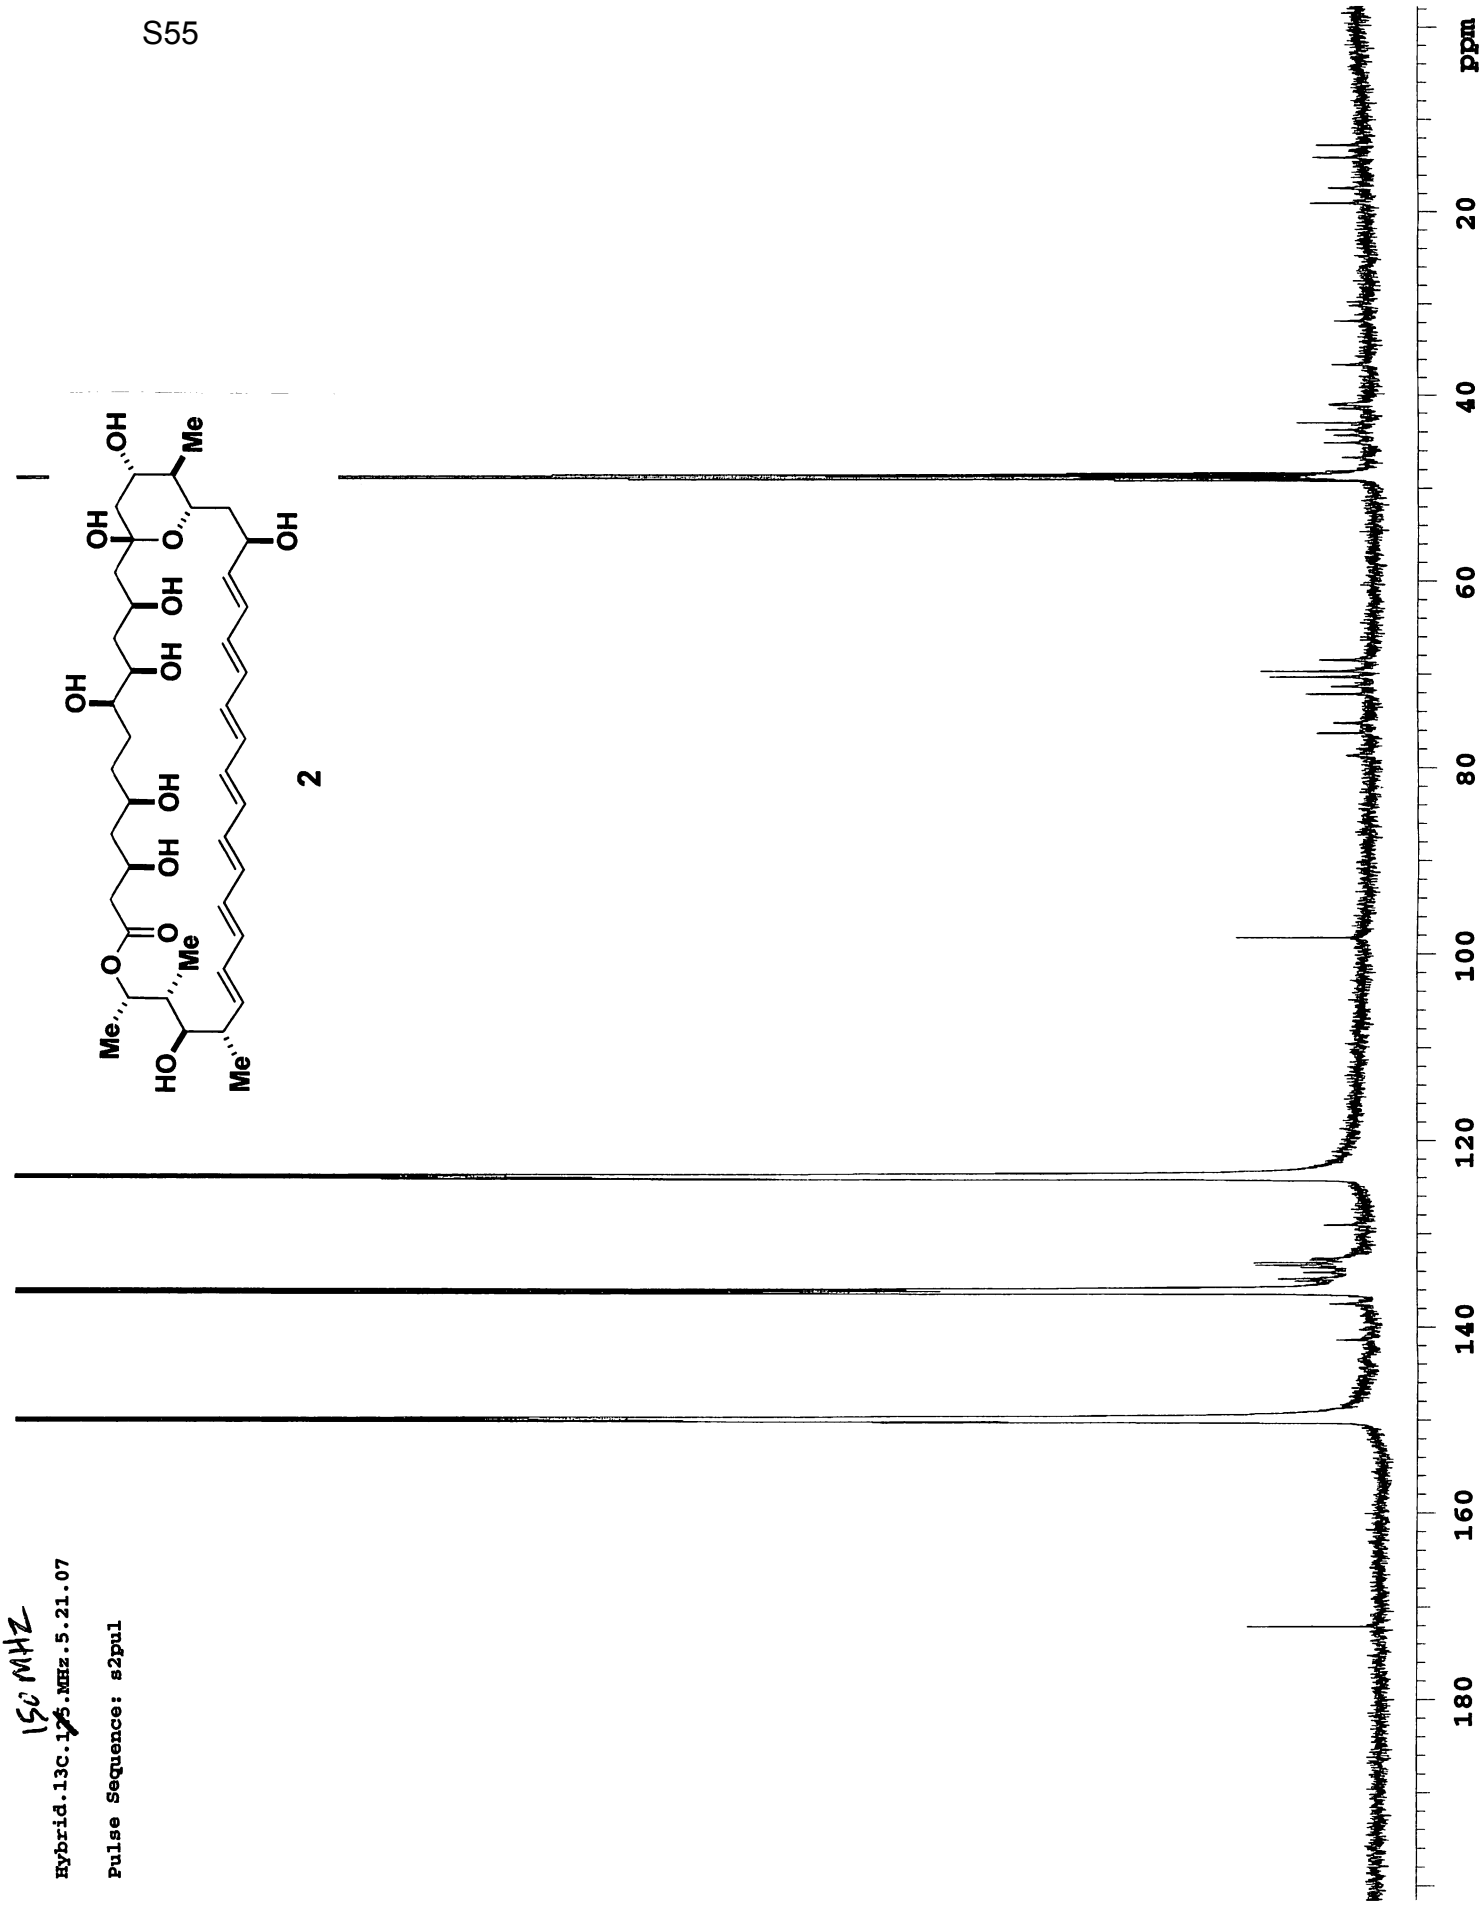

S55

MeAndeB.gCOSY.600.MHz

Pulse Sequence: gcosy

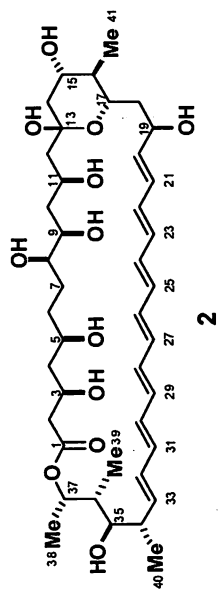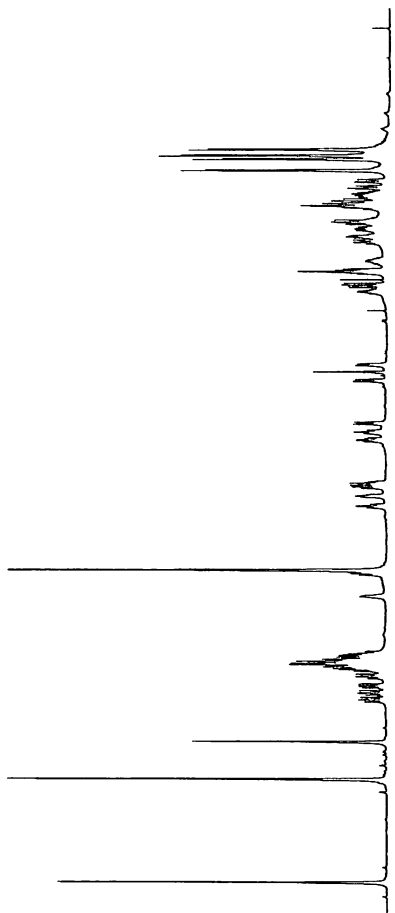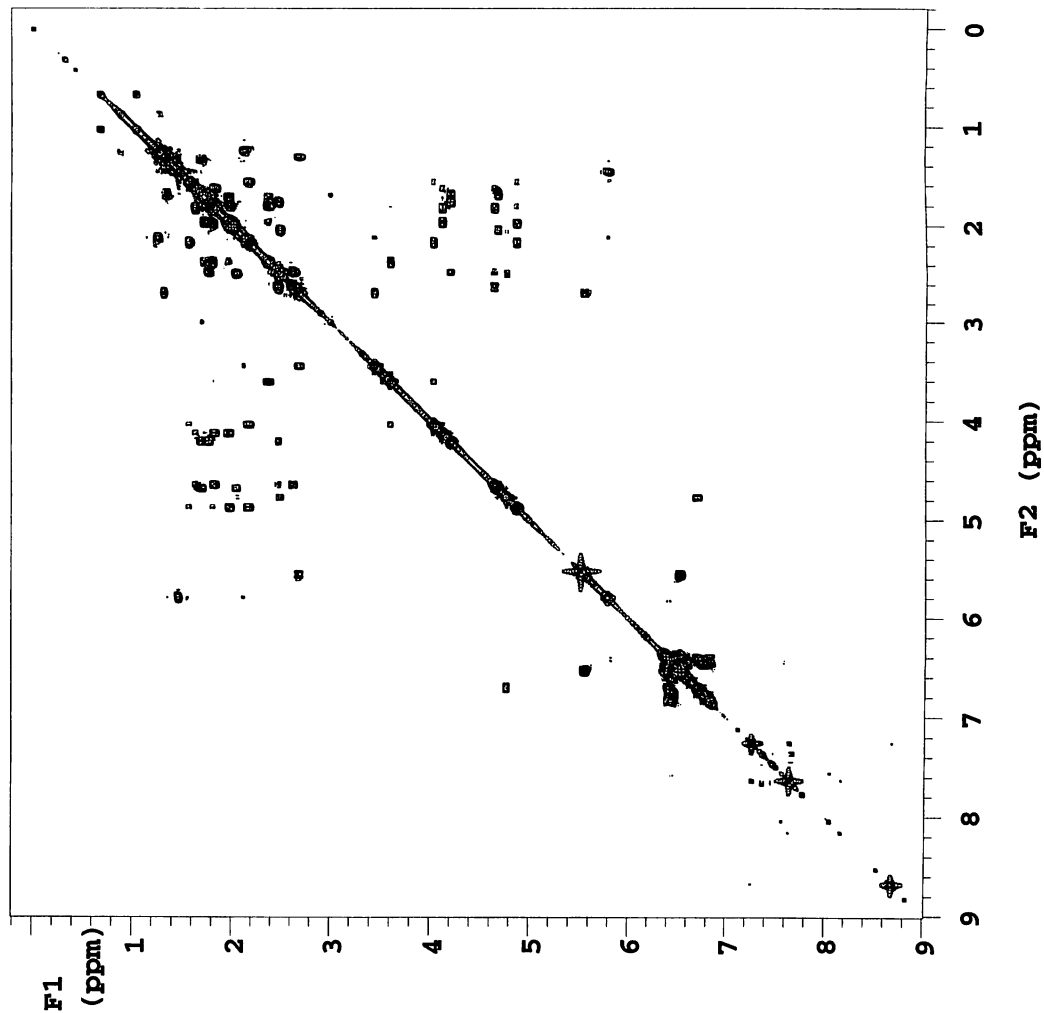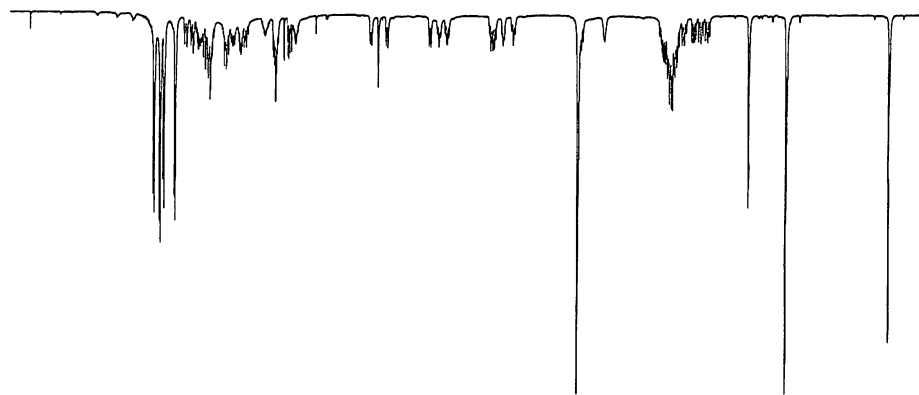

S57

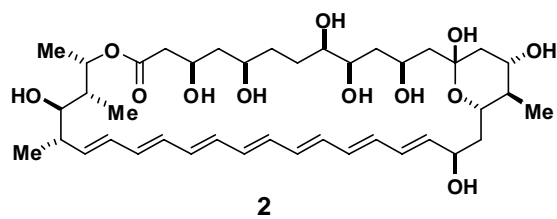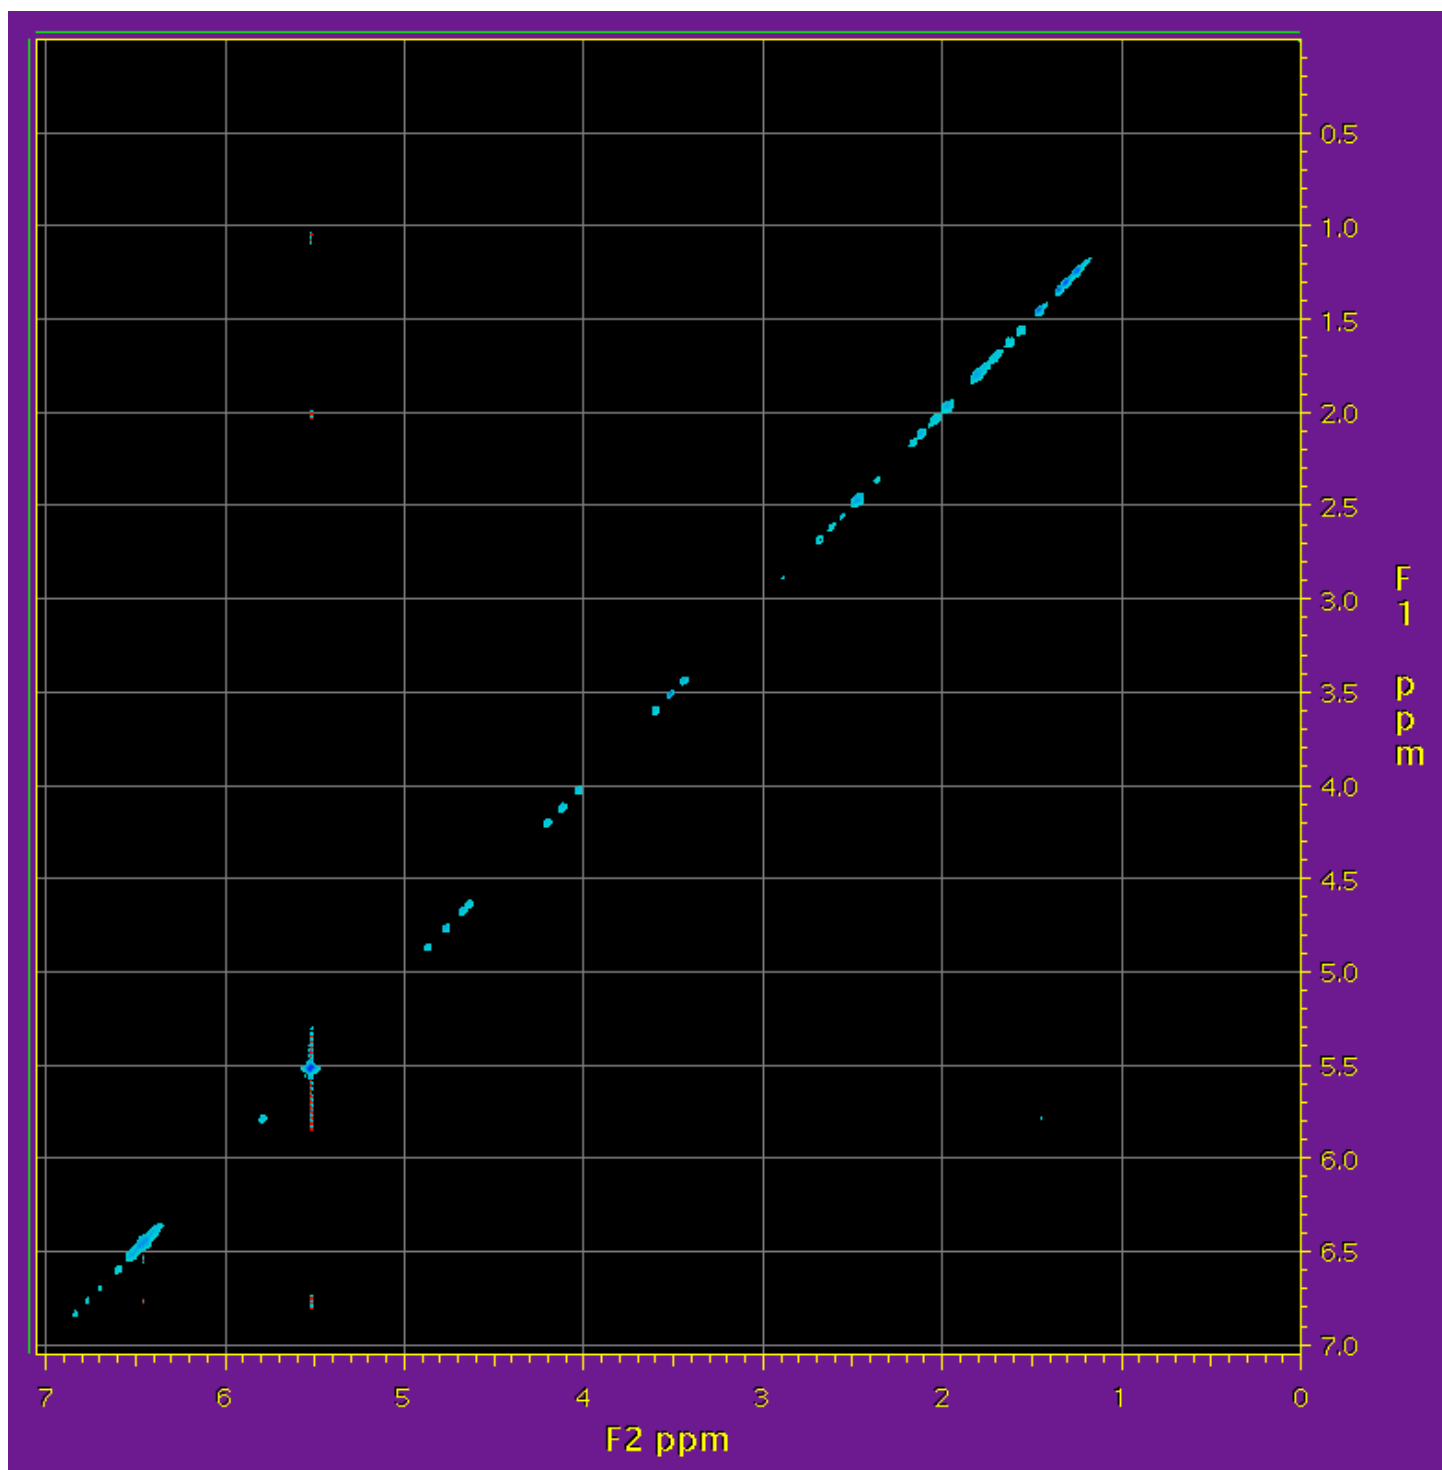

500 MHz diagonal COSYPS spectrum of 2

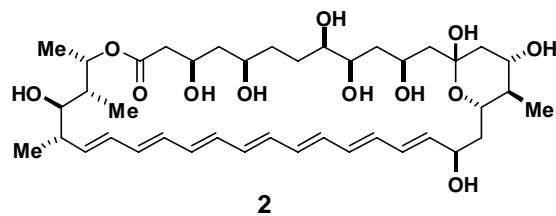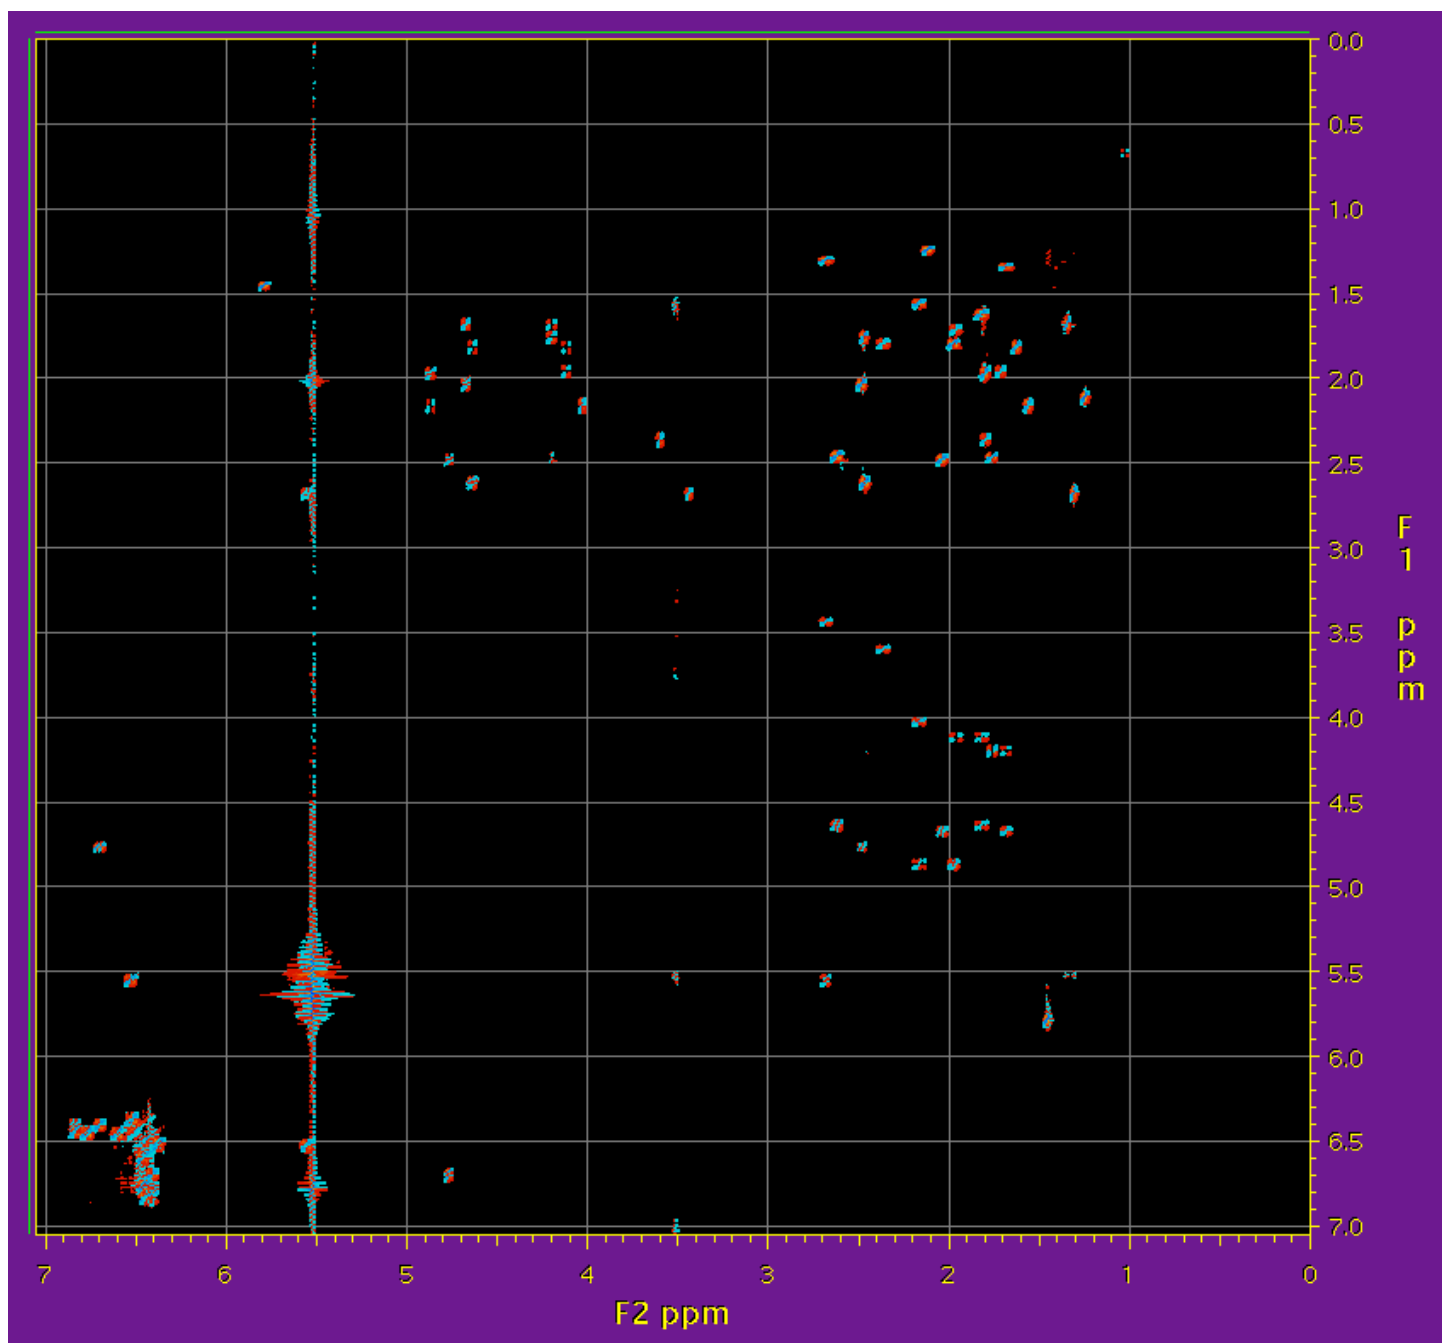

**500 MHz COSYPS diagonal-suppressed spectrum of 2**

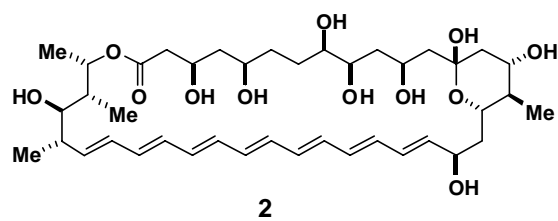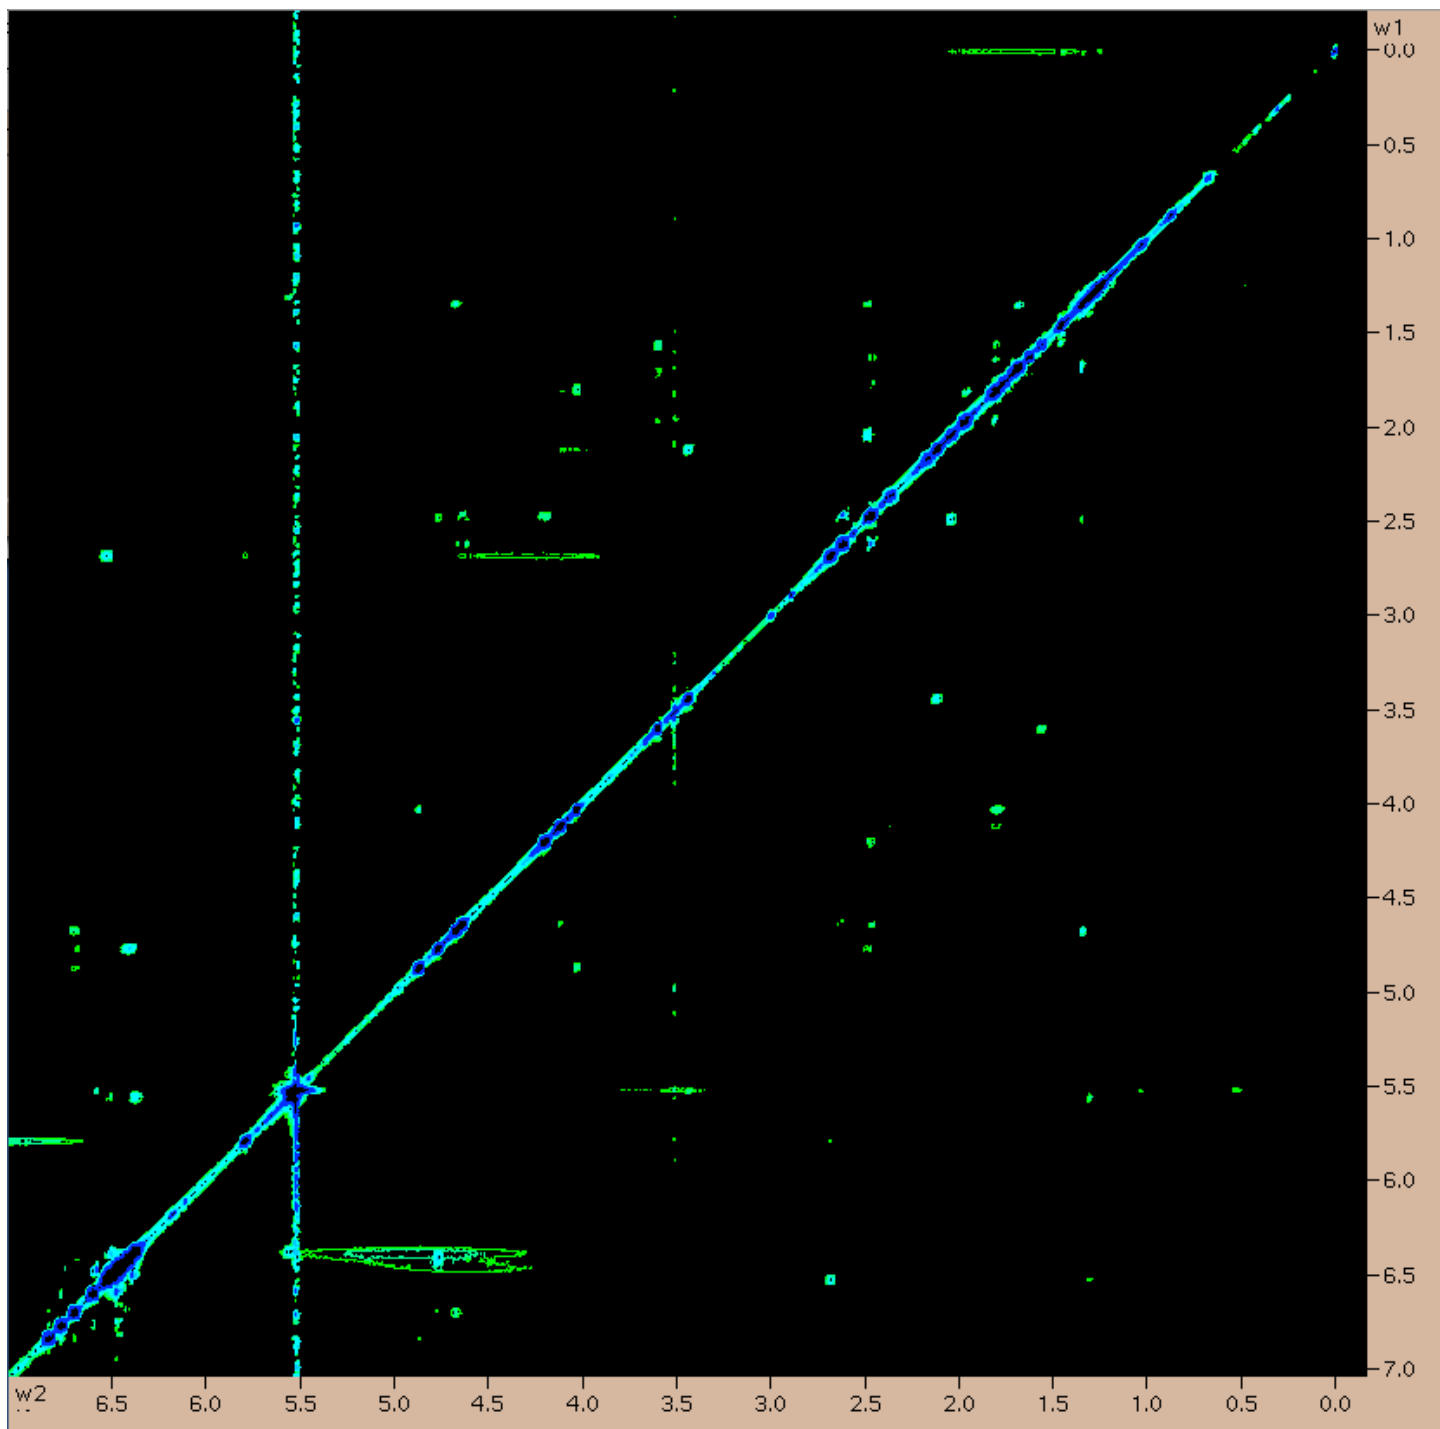

600 MHz NOESY Spectrum of 2

STANDARD PROTON PARAMETERS

```

exp1 s2pul
SAMPLE
date Jun 1 2007
solvent pyridine
file exp
ACQUISITION
sfrq 500.070
tn 18
at 4.096
np 65536
sw 8000.0
fb 4000
bs 4
tpwr 55
pw 7.7
d1 0
tof 0
nt 129
ct 52
alock n
gain not used
FLAGS
il n
in n
dp y
hs n
DISPLAY
sp -250.1
wp 5250.7
vs 1267
sc 0
wc 250
hzmm 21.00
is 33.57
rfl 1610.0
rfp 0
th 7
ins 100.000
ai cdc ph
DEC. & VT
dfreq 500.070
dn 18
dpxr 0
dof n
dm n
dmm c
dmf 200
dseq 1.0
dres n
homo DEC2
dfir2 0
dn2 1
dpxr2 0
dof2 n
dmm2 c
dmf2 200
dres2 1.0
homo2 n
lb 0.30
wtfile ft
proc 262144
math f
werr 0
wexp 250
wbs 21.00
wnt 33.57

```

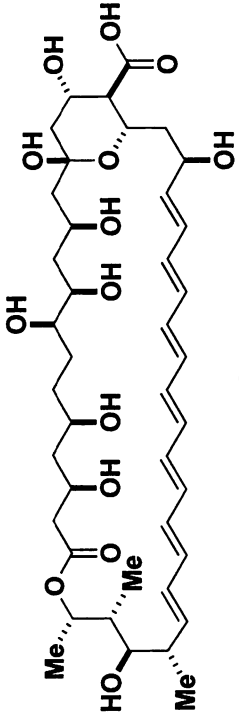

3

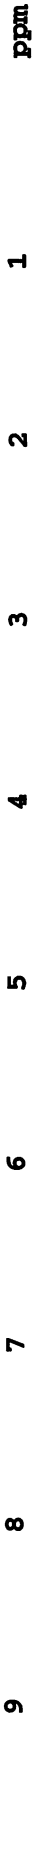

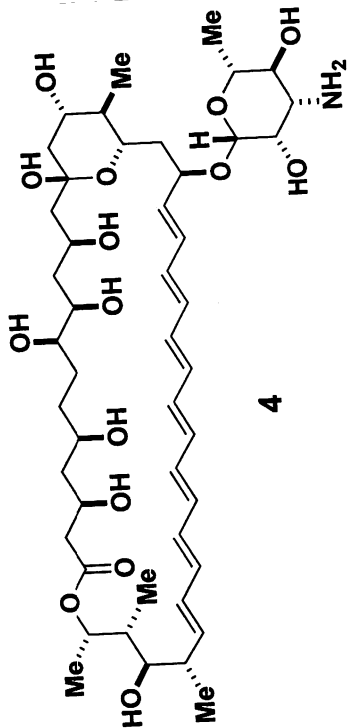

STANDARD PROTON PARAMETERS

```

exp1 s2pul
SAMPLE
date Jun 1 2007 dfreq 500.070
solvent pyridine dn H1
file exp dprwr 18
ACQUISITION
sfrq 500.070 dm nnn
tn H1 dnm c
at 4.096 dmf 200
np 65536 dseq 1.0
sw 8000.0 dres n
fb 4000 homo
bs 4 DEC2
tpwr 55 dfreq2 0
pw 7.7 dn2
d1 0 dpwr2 1
tof 0 dof2 0
nt 128 dm2 n
ct 12 dnm2 c
alock n dmf2 200
gain not used dseq2
FLAGS dres2 1.0
il n homo2 n
in n PROCESSING
dp y lb 0.30
hs xn wtfile
DISPLAY
sp -250.1 fn ft
wp 5250.7 math 262144
vs 846 f
sc 0 werr
wc 250 wexp
hzmm 21.00 wbs
is 33.57 wat
rfl 1621.0
rfp 0
th 7
ins 100.000
ai cdc ph
    
```

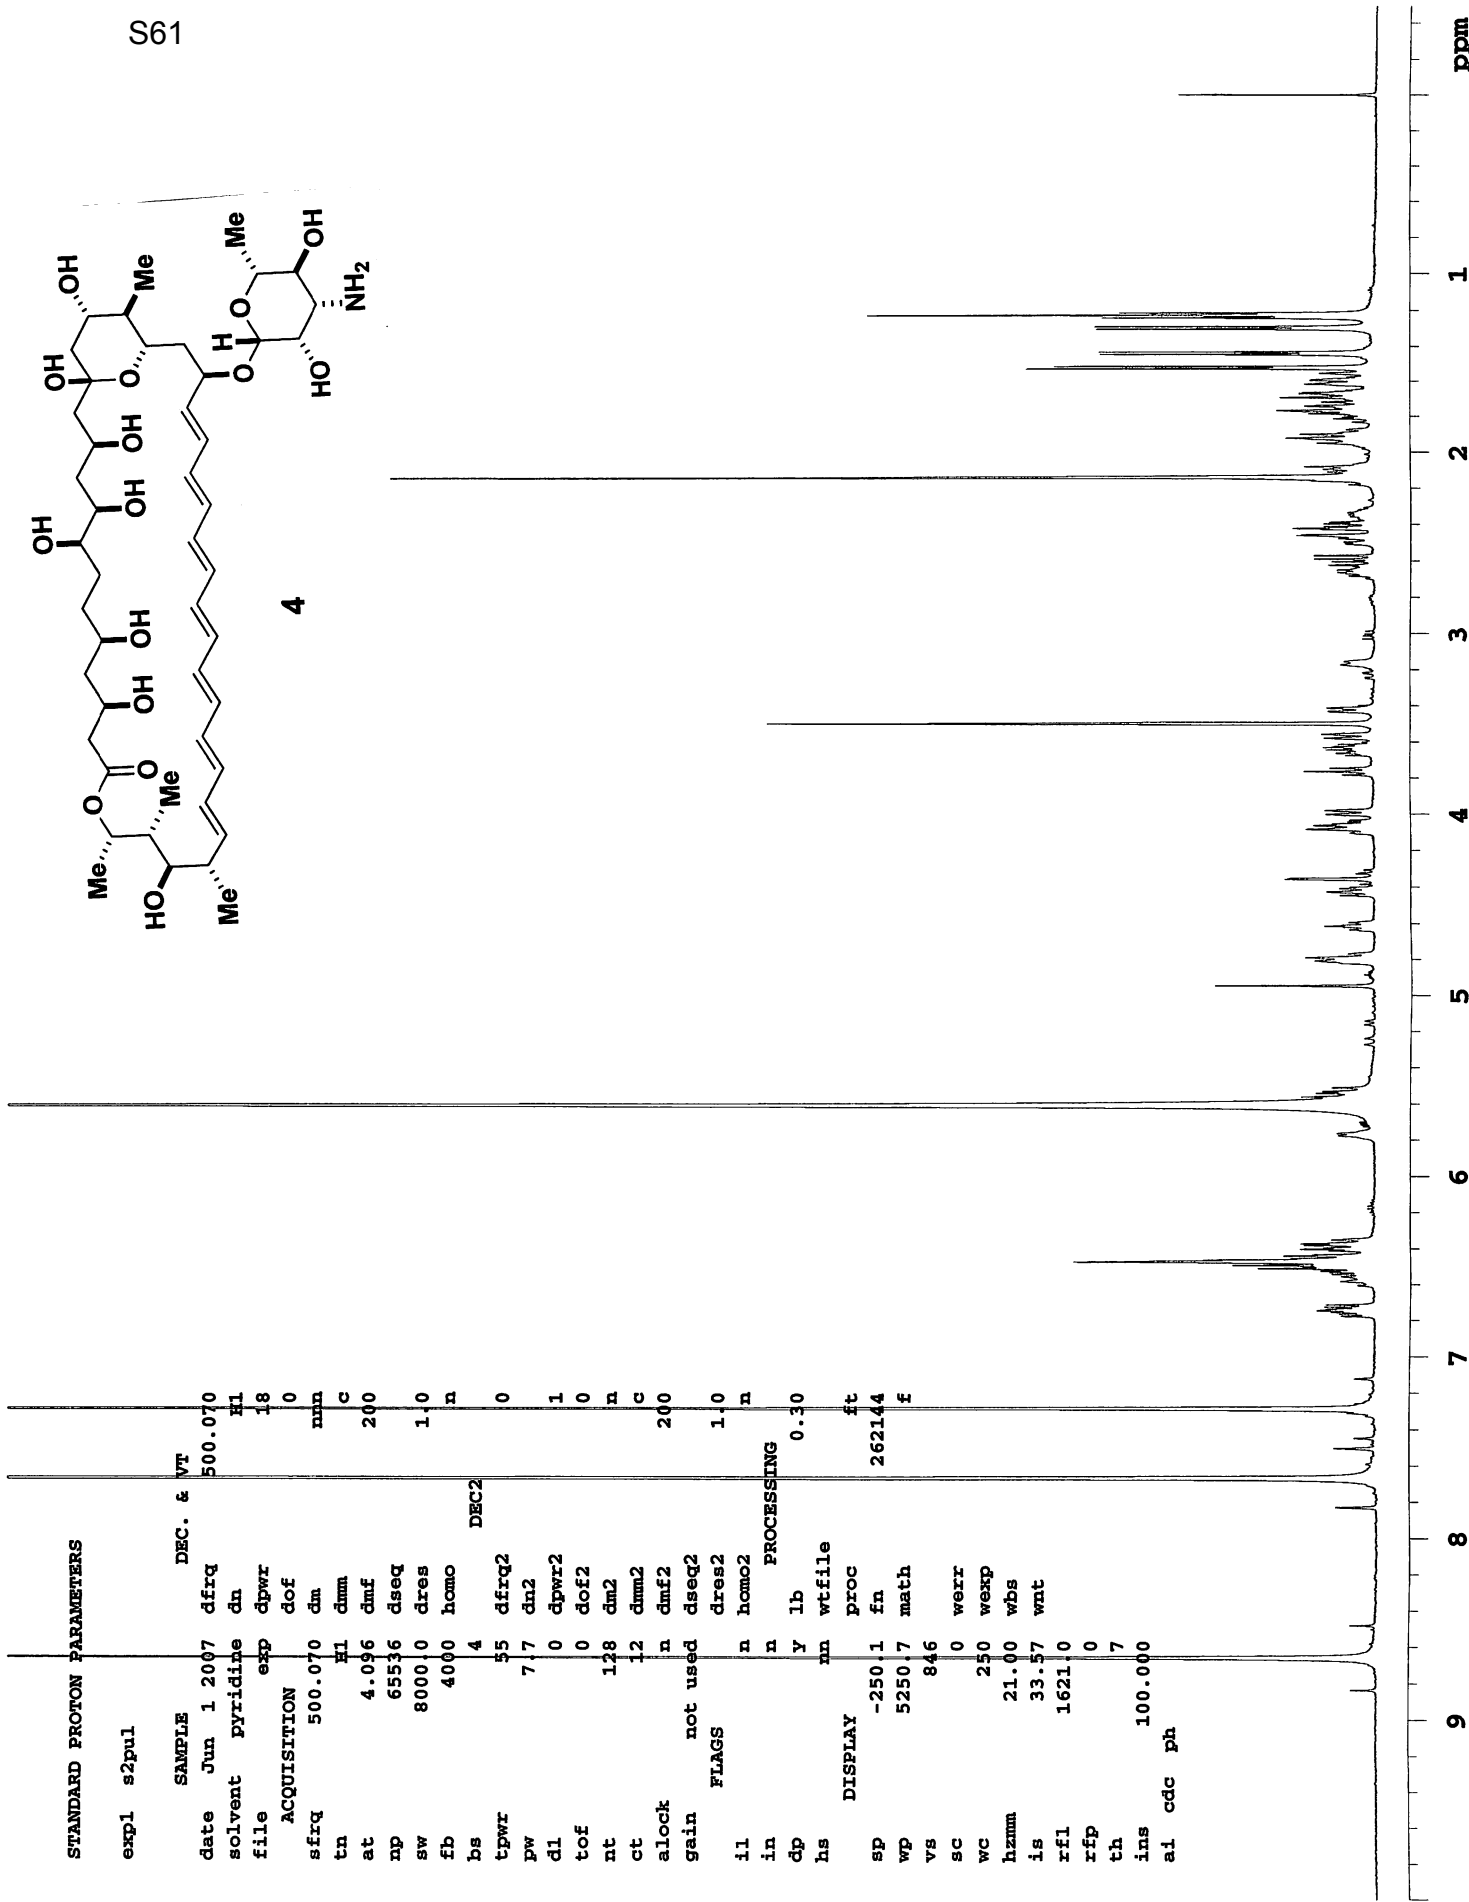

9 8 7 6 5 4 3 2 1 ppm



## STANDARD PROTON PARAMETERS

Pulse Sequence: s2pul

Solvent: Acetone

Ambient temperature

INOVA-500 "ui500nb"

Pulse 90.0 degrees

Acq. time 4.096 sec

Width 8000.0 Hz

12 repetitions

OBSERVE H1, 500.0755708 MHz

DATA PROCESSING

Line broadening 0.3 Hz

FT size 262144

Total time 8 min, 45 sec

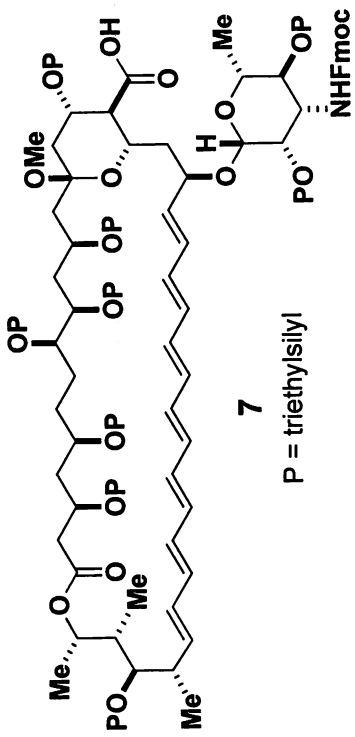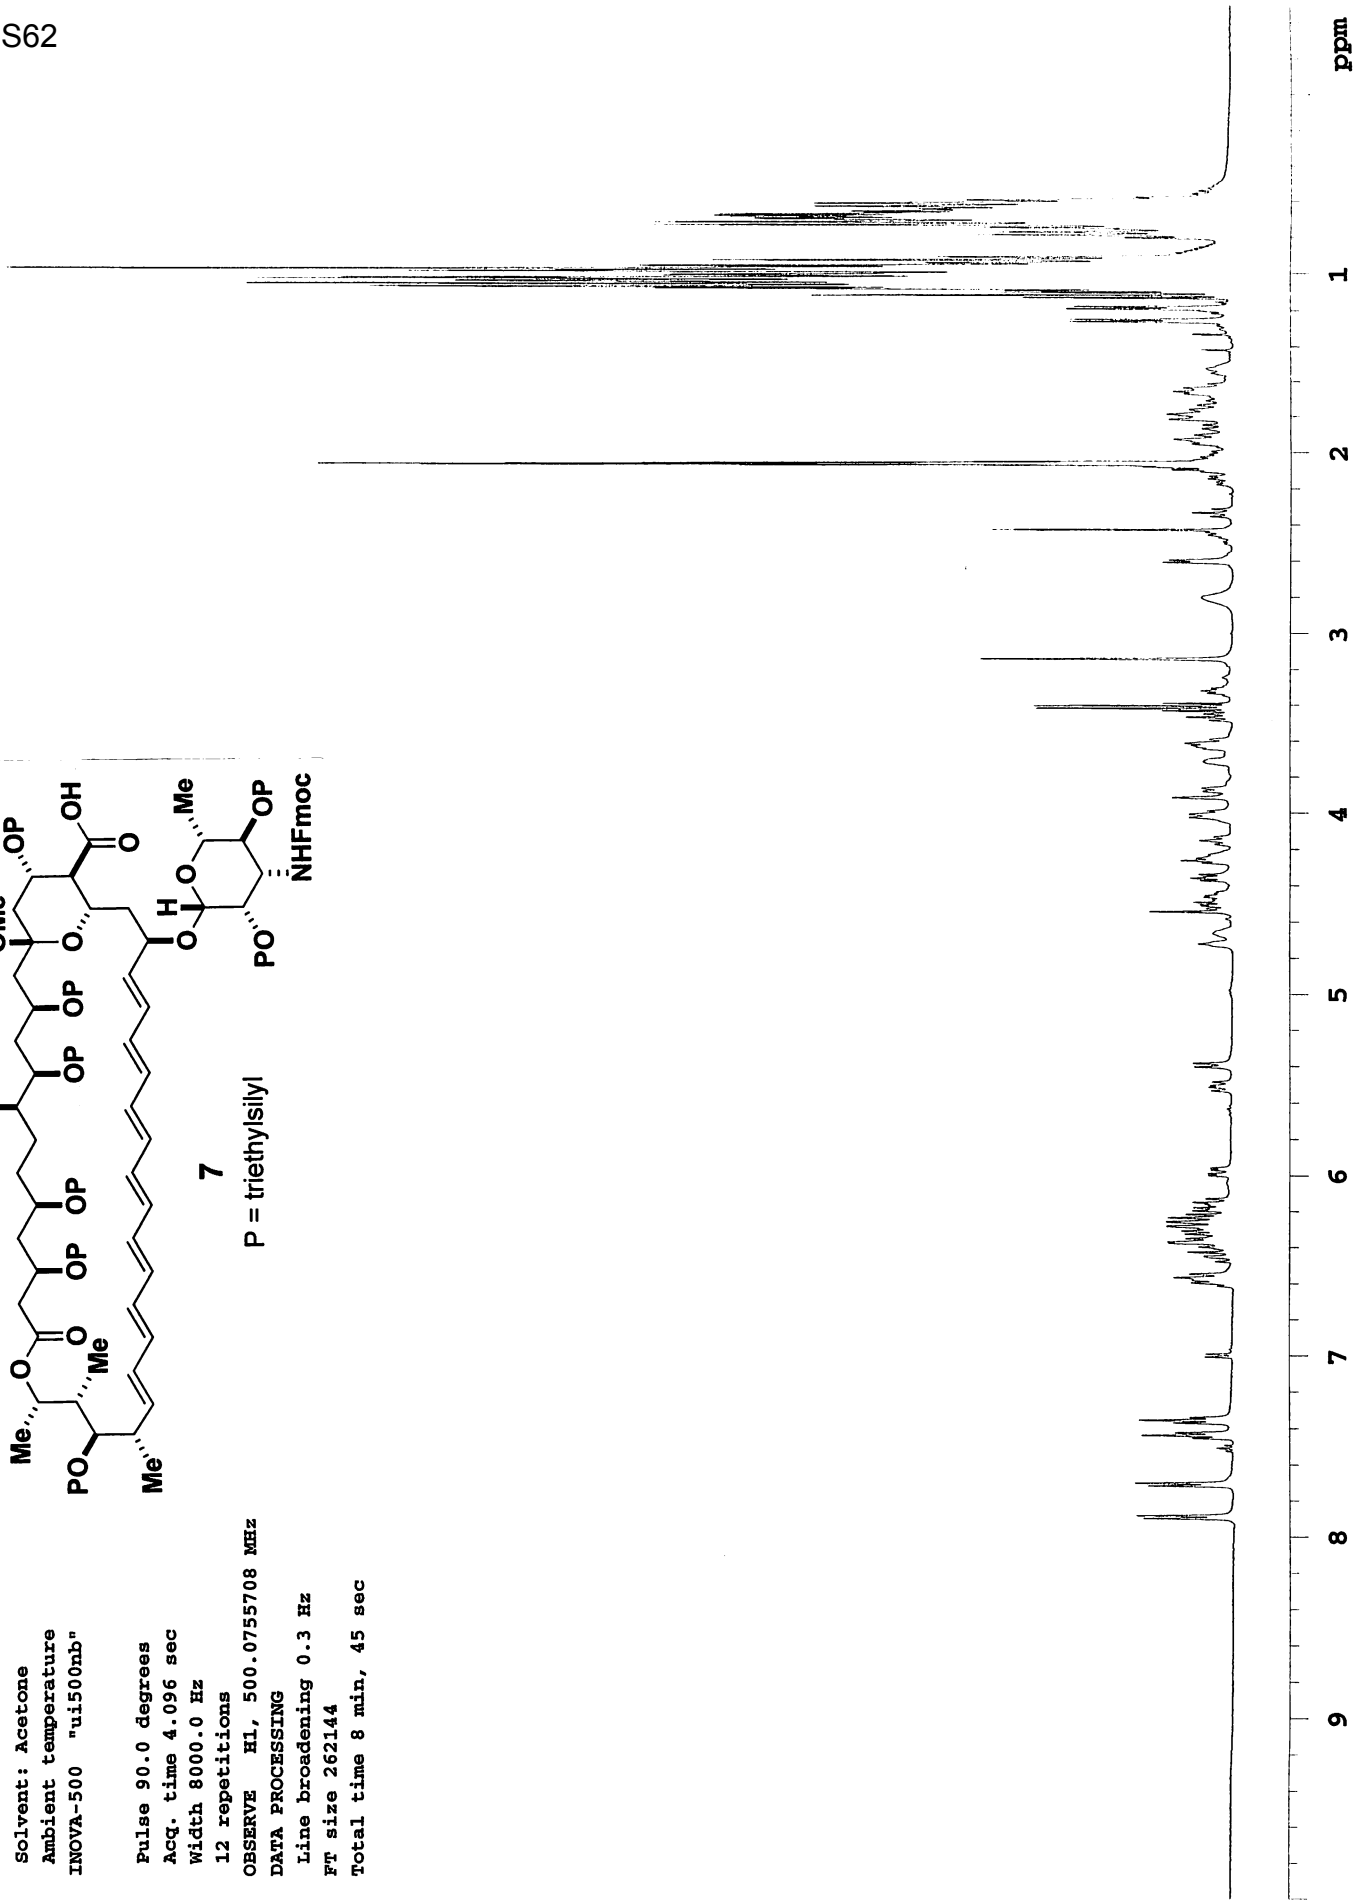

ppm

1

2

3

4

5

6

7

8

9

STANDARD CARBON PARAMETERS

Pulse Sequence: s2pul  
 Solvent: Acetone  
 Ambient temperature  
 User: 1-14-87  
 File: dsp48c.13c  
 INOVA-500 "sunds1"

Relax. delay 3.000 sec  
 Pulse 55.4 degrees  
 Acq. time 1.024 sec  
 Width 32000.0 Hz  
 7872 repetitions

OBSERVE C13, 125,5838716 MHz  
 DECOUPLE H1, 499,4401296 MHz  
 Power 44 dB  
 continuously on  
 WALTZ-16 modulated  
 DATA PROCESSING  
 Line broadening 1.0 Hz  
 Ff size 65536  
 Total time 11 hr, 12 min, 9 sec

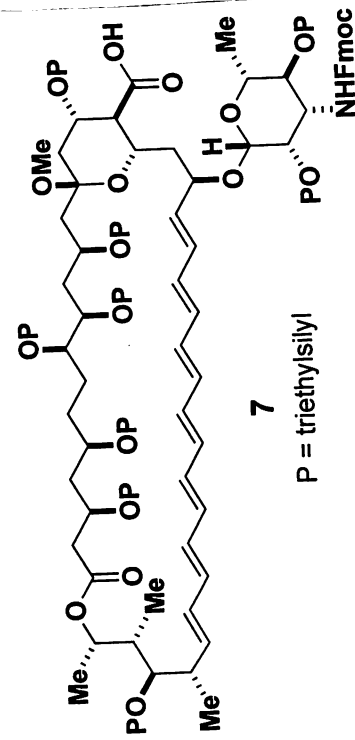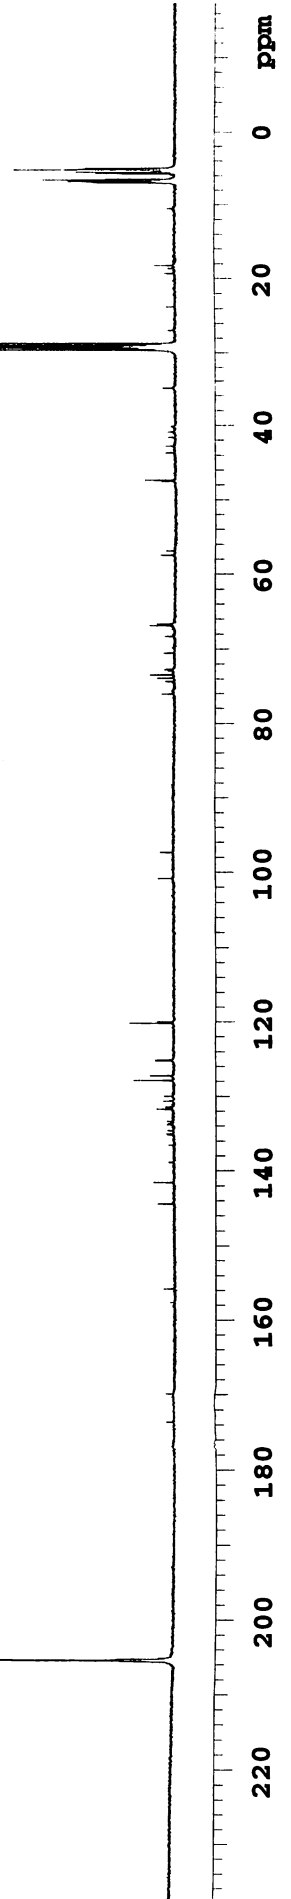

## STANDARD PROTON PARAMETERS

Pulse Sequence: s2pul

Solvent: Acetone

Temp. 23.0 C / 296.1 K

INOVA-500 "ui500mb"

Relax. delay 4.000 sec

Pulse 90.0 degrees

Acq. time 4.096 sec

Width 8000.0 Hz

8 repetitions

OBSERVE H1, 500.0755803 MHz

DATA PROCESSING

Line broadening 0.3 Hz

Ft size 262144

Total time 17 min, 17 sec

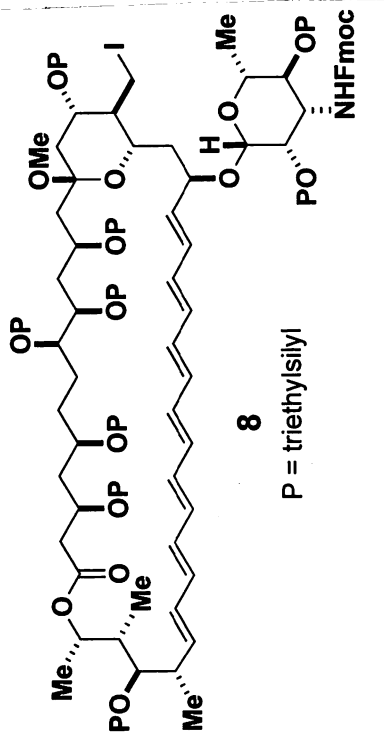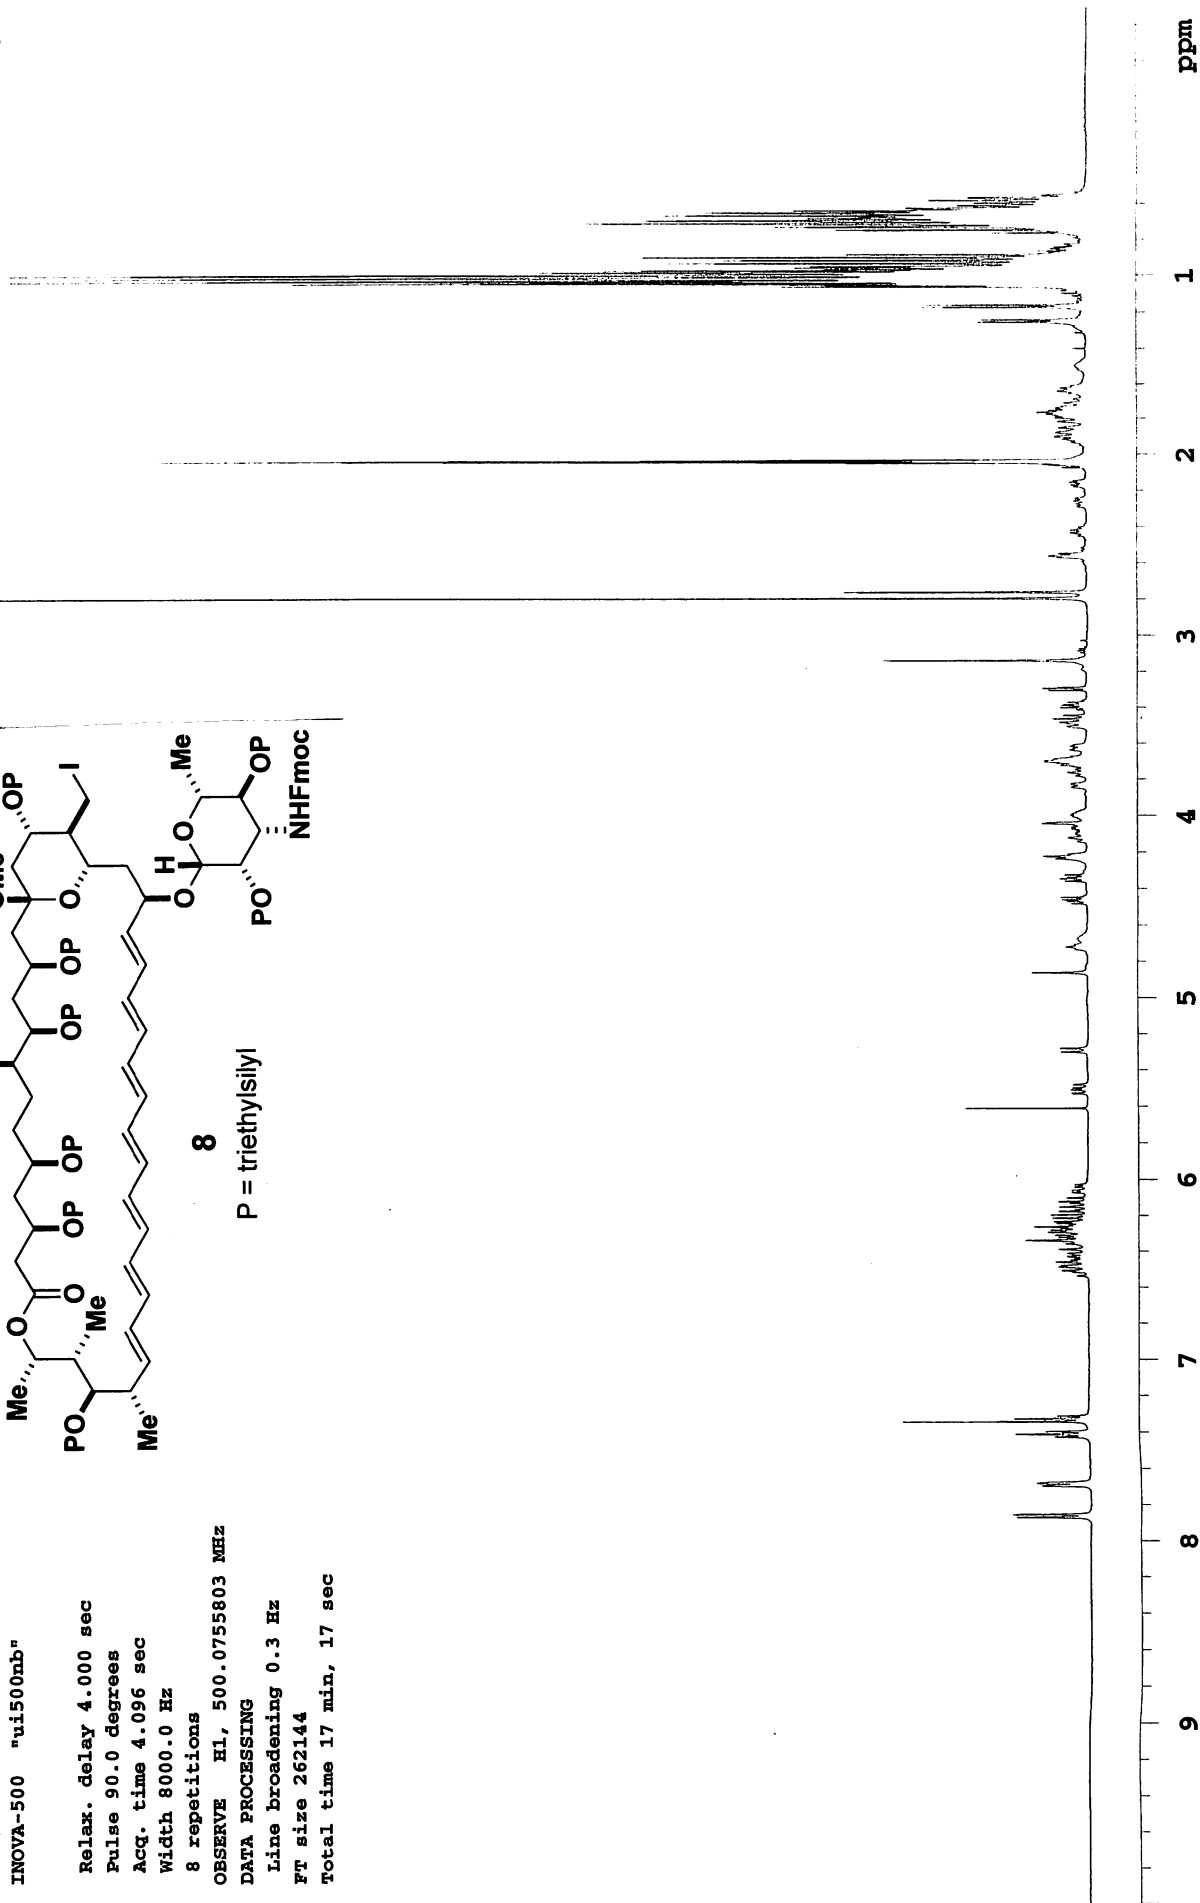

STANDARD CARBON PARAMETERS

```

exp1 s2pul
SAMPLE
date May 26 2007 dfreq 499.701
solvent Acetone dn H1
file /export/home/~ dpwr 44
data/u500/Burke/pa- dof -827.6
lacios/dsp.58c.13c- dm YYY
.fid dnm w
ACQUISITION
sfrq 125.663 dseq 12000
tn C13 dres 90.0
at 1.086 homo n
np 65536 DEC2
sw 30165.9 dfrq2 0
fb 16600 dm2 1
bs 16 dpwr2 0
ss 1 dof2 n
tpwr 53 dm2 c
pw 6.0 dnm2 10000
d1 1.000 dmf2
tof 1884.7 dseq2
nt 10000 dres2 1.0
ct 560 hcmo2 n
alock n PROCESSING
gain not used lb 1.00
wtfile
FLAGS
il n proc ft
in n fn not used
dp y math f
hs nn
DISPLAY
sp -1260.2 wexp
wp 30165.0 wbs
vs 293 wnt
sc 0
wc 250
hzmm 8.93
is 500.00
rfl 1261.1
rfp 0
th 22
ins 100.000
nm ph
    
```

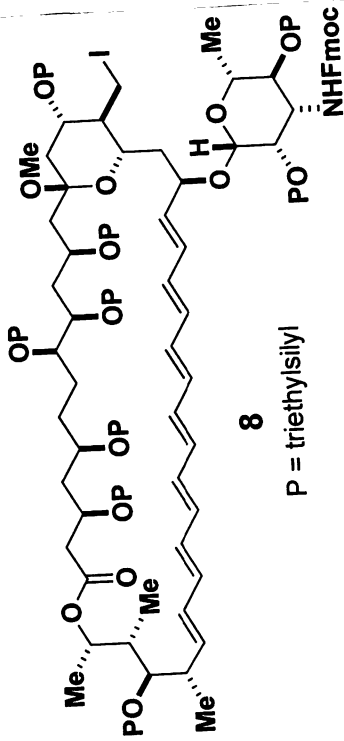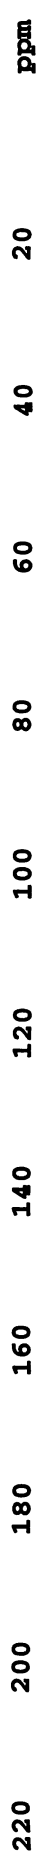

## STANDARD PROTON PARAMETERS

Pulse Sequence: s2pul

Solvent: Acetone

Ambient temperature

INOVA-500 "ui500nb"

Pulse 90.0 degrees

Acq. time 4.096 sec

Width 8000.0 Hz

16 repetitions

OBSERVE H1, 500.0755803 MHz

DATA PROCESSING

Line broadening 0.3 Hz

Ft size 262144

Total time 8 min, 45 sec

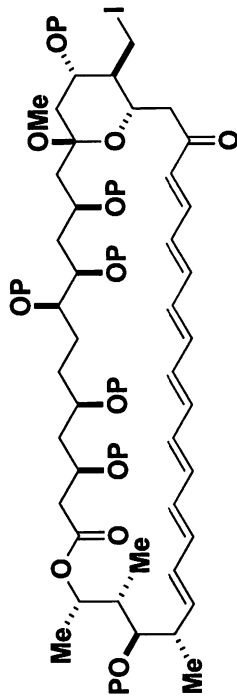

9

P = triethylsilyl

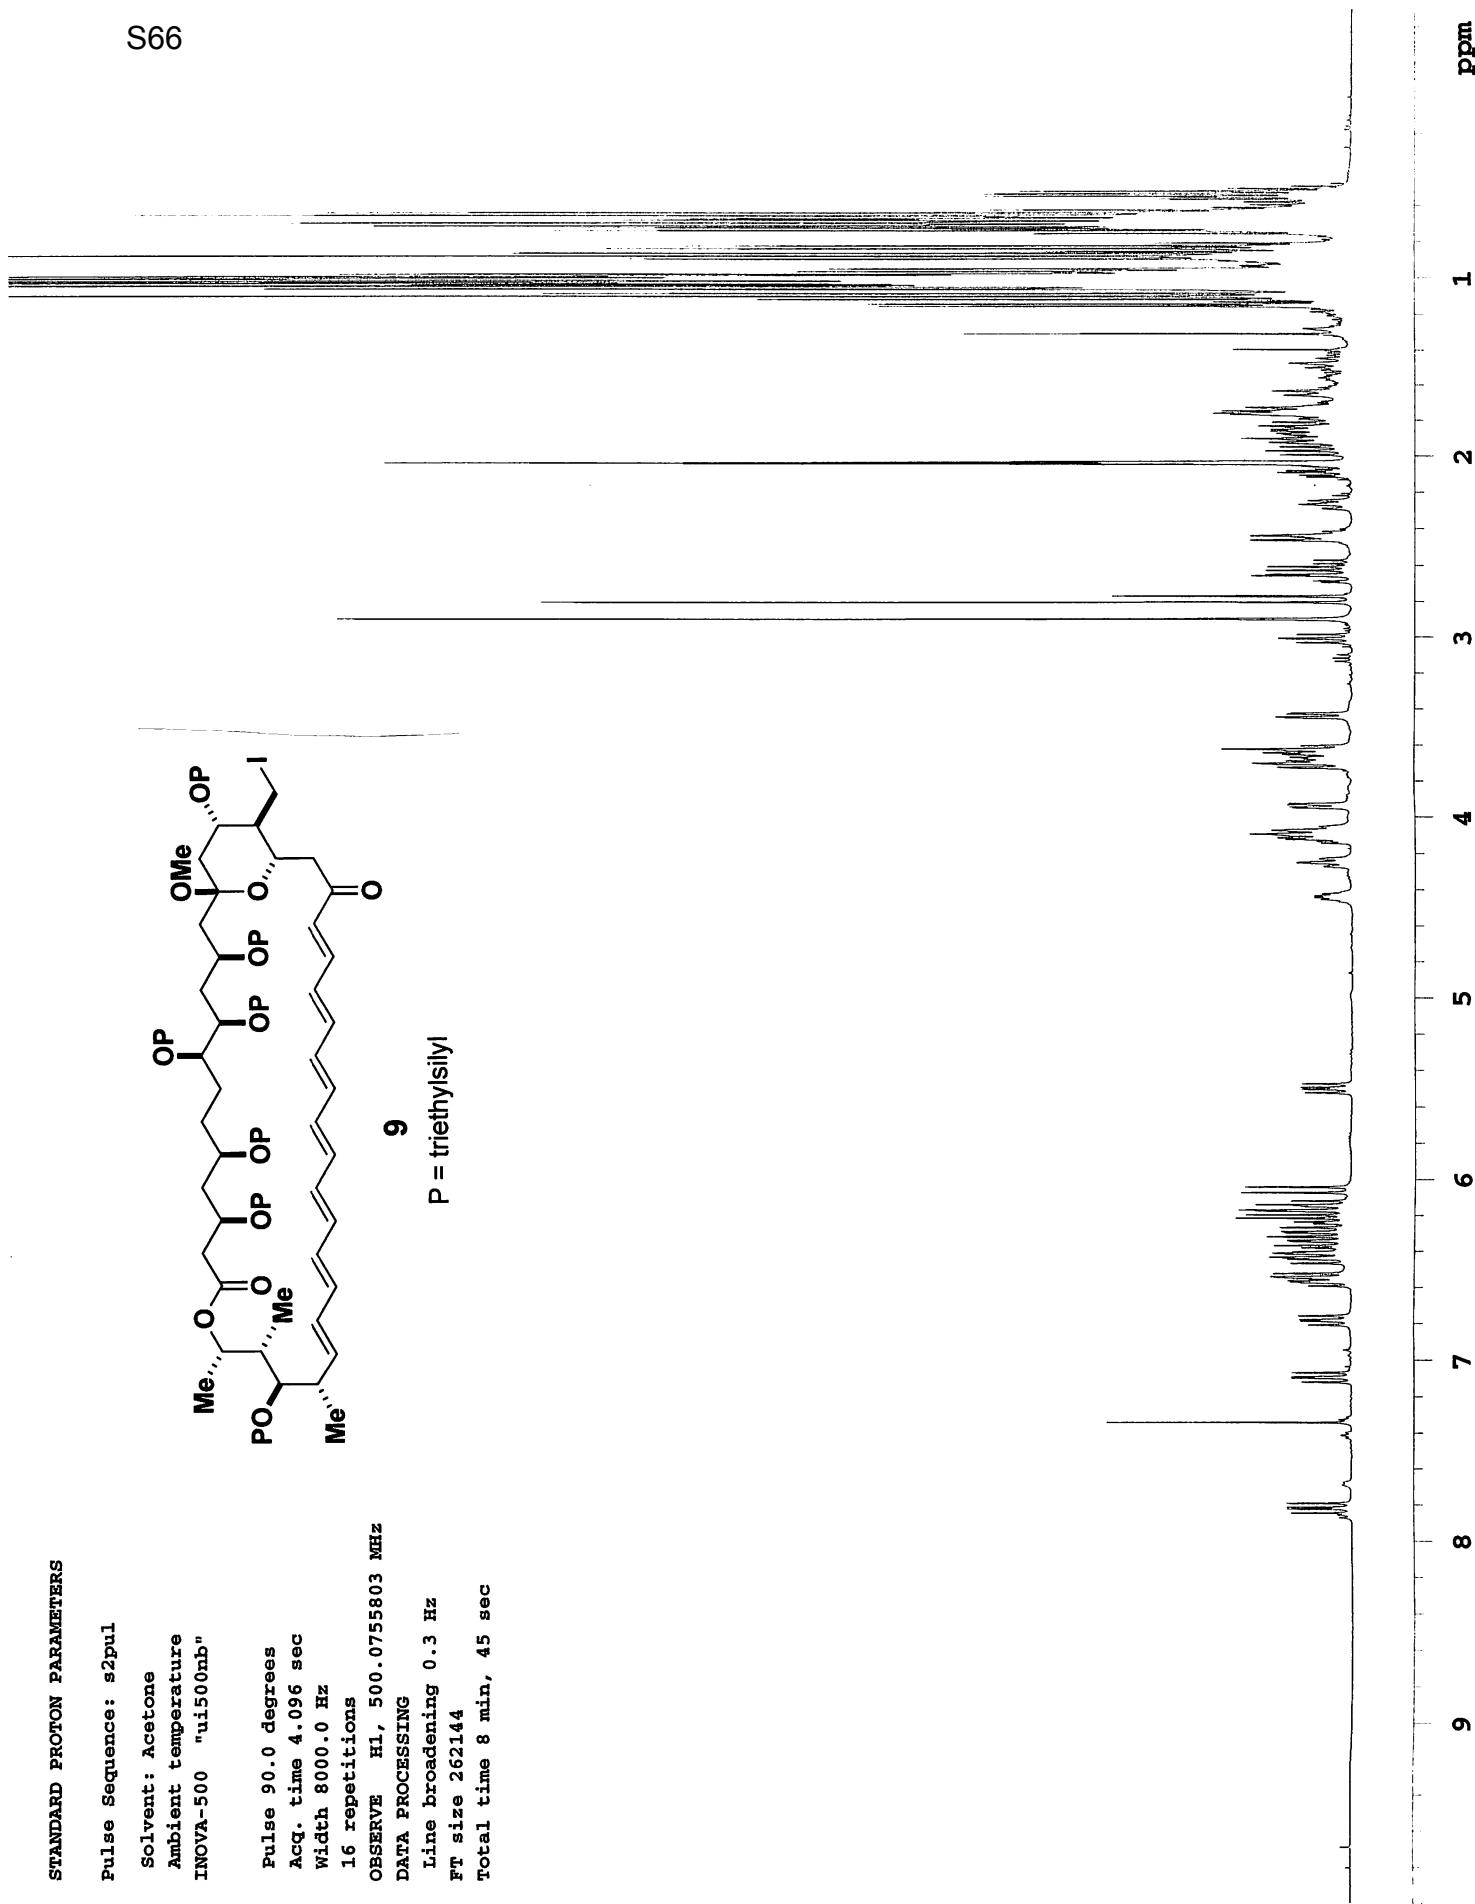

## STANDARD CARBON PARAMETERS

Pulse Sequence: s2pul

Solvent: Acetone

Ambient temperature

User: 1-14-87

UNITY-500 "u500"

Relax. delay 5.000 sec

Pulse 45.0 degrees

Acq. time 1.086 sec

Width 30165.9 Hz

4464 repetitions

OBSERVE C13, 125.6493934 MHz

DECOUPLE H1, 499.7007057 MHz

Power 42 dB

continuously on

WALTZ-16 modulated

DATA PROCESSING

Line broadening 1.0 Hz

Ft size 65536

Total time 16 hr, 56 min, 17 sec

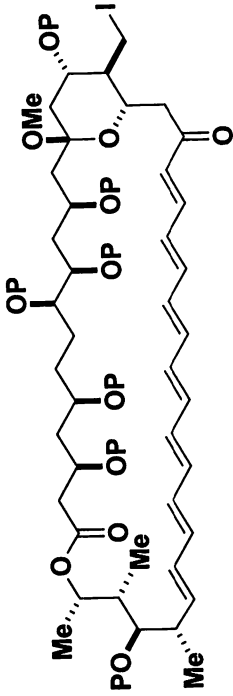

9

P = triethylsilyl

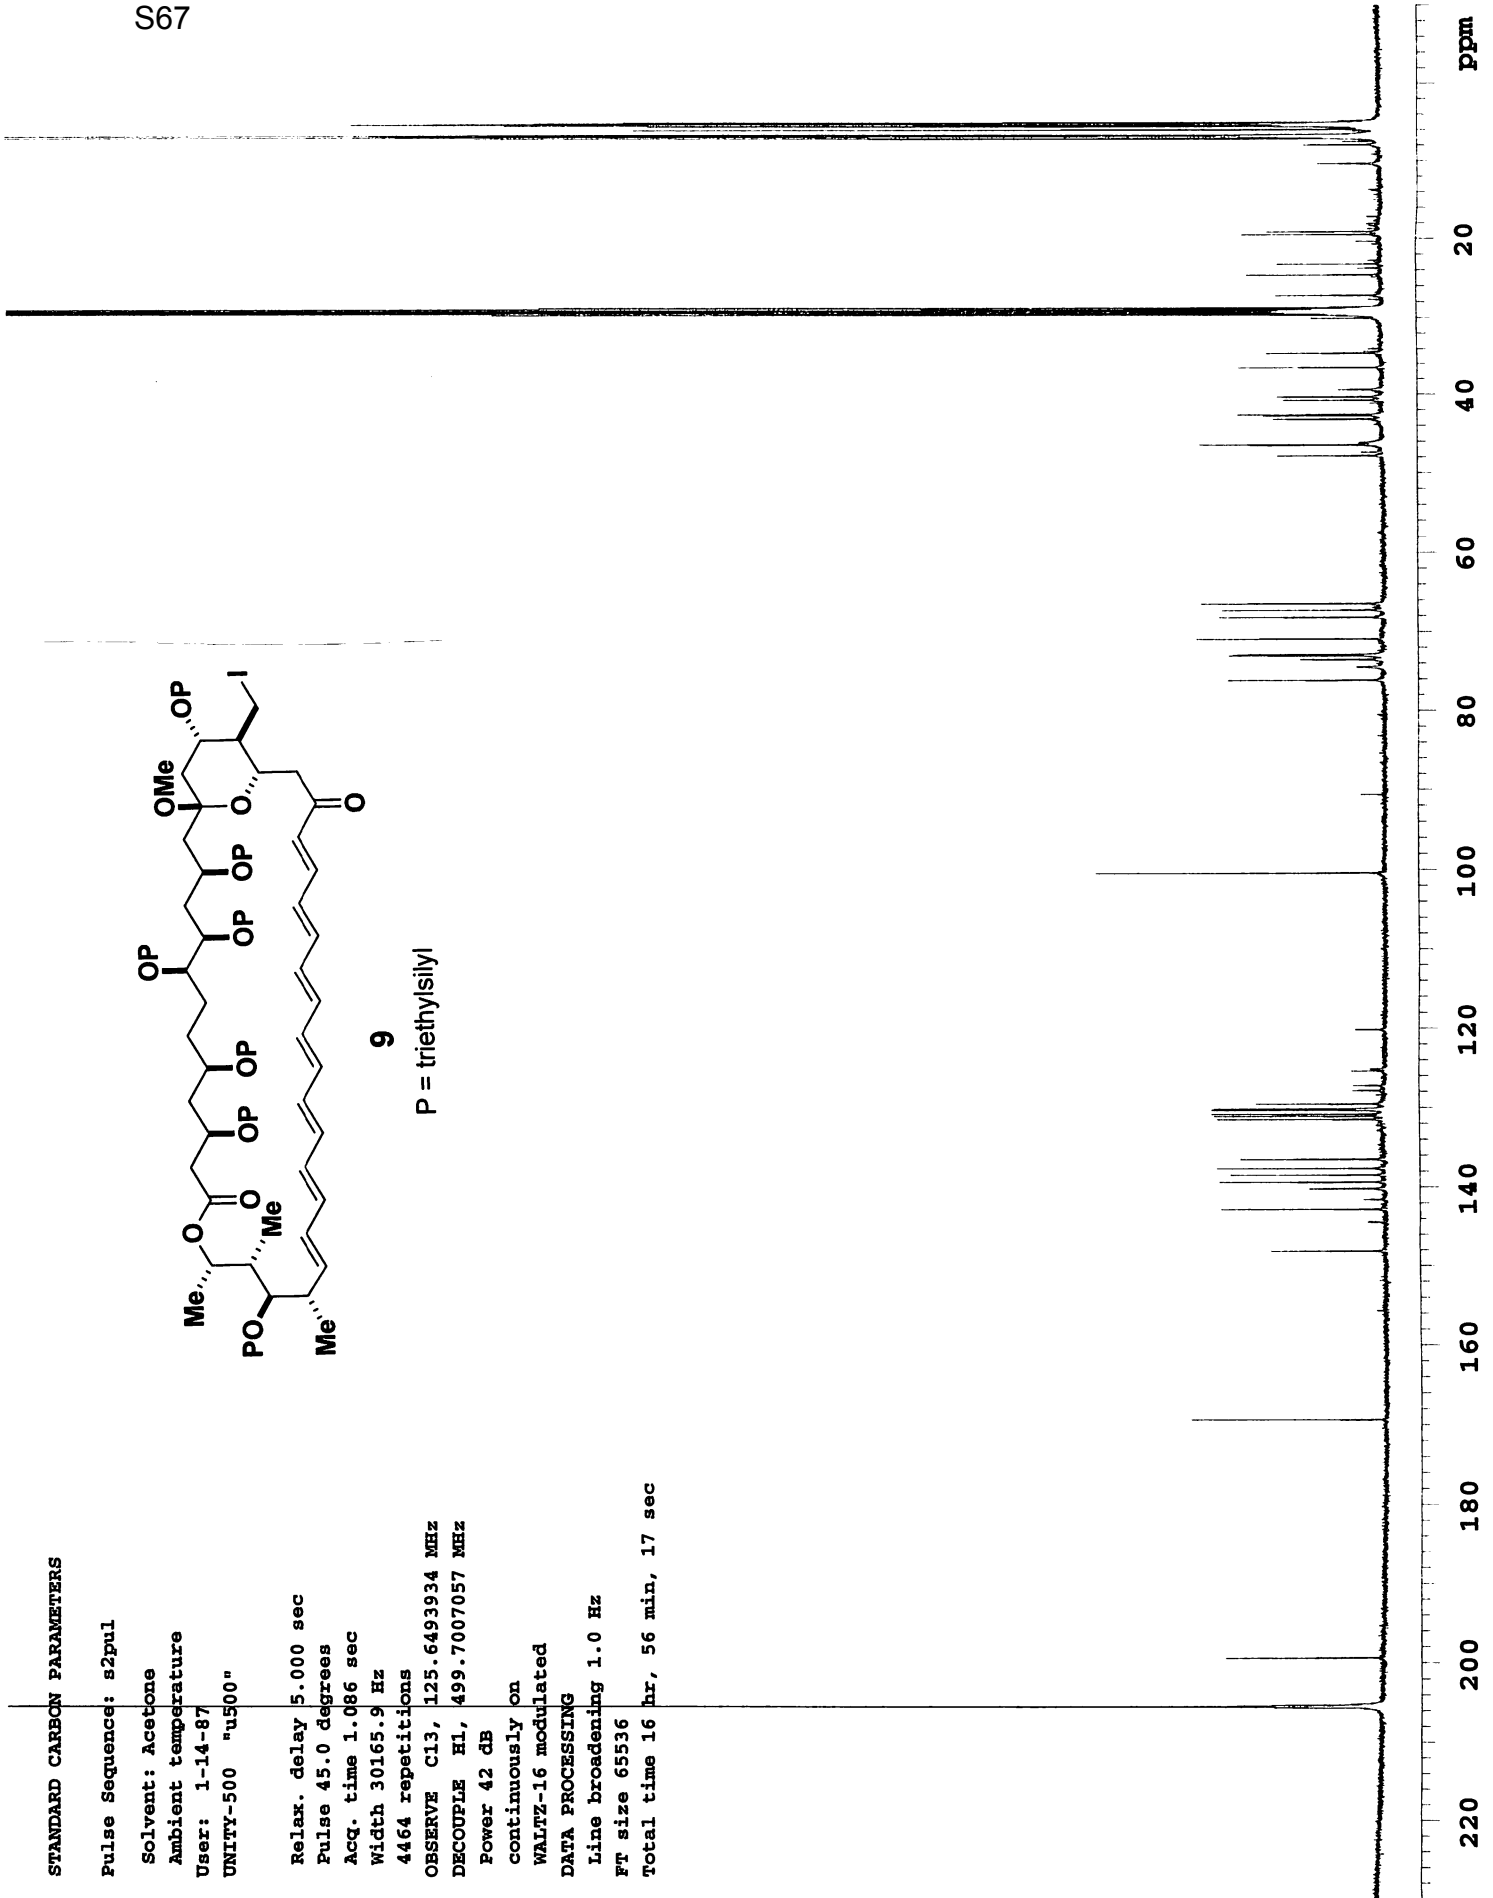

STANDARD PROTON PARAMETERS

```

exp3 s2pul
SAMPLE
date May 3 2007 dfrq 500.073 DEC. & VT
solvent Acetone dn H1
file /export/home/~ dpwr 18
data/Burke/palacio- dof 0
s/dsp.99c.1h.fid dm nnn
ACQUISITION
sfrq 500.073 dmf 200 c
tn H1 dseq 200
at 4.096 dres 1.0
np 65536 homo n
sw 8000.0 DEC2
fb 4000 dfrq2 0
bs 4 dn2
tpwr 55 dpwr2 1
pw 7.7 dof2 0
d1 0 dm2 n
tof 0 dnm2 c
nt 128 dmf2 200
ct 20 dseq2
alock n dres2 1.0
gain not used homo2 n
PROCESSING
il n lb 0.30
in n wfile
dp y proc ft
hs nn fn 262144
DISPLAY
sp -250.1 f
vp 5250.7 werr
vs 254 wexp
sc 0 wbs
wc 250 wnt
hzmm 21.00
is 33.57
rfl 2537.4
rfp 1020.1
th 7
ins 100.000
ai cdc ph
    
```

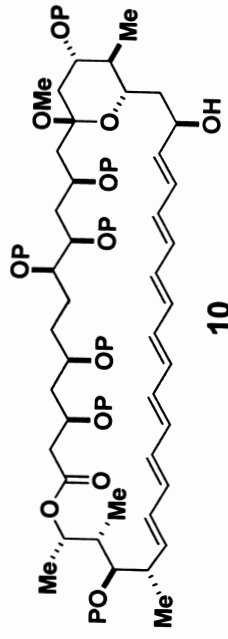

10  
P = triethylsilyl

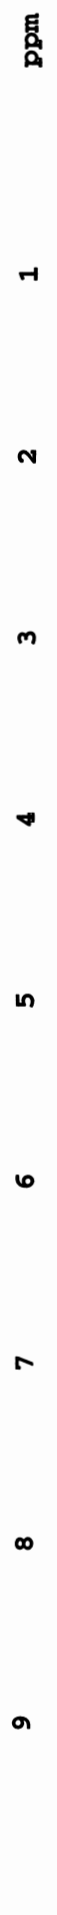

## STANDARD CARBON PARAMETERS

Pulse Sequence: s2pul

Solvent: Acetone

Ambient temperature

User: 1-14-87

INOVA-500 "vvr500"

Relax. delay 1.000 sec

Pulse 53.3 degrees

Acq. time 1.024 sec

Width 32000.0 Hz

16048 repetitions

OBSERVE C13, 125.5823684 MHz

DECOUPLE H1, 499.4341558 MHz

Power 44 dB

continuously on

WALTZ-16 modulated

DATA PROCESSING

Line broadening 1.0 Hz

FT size 65536

Total time 56 hr, 28 min, 10 sec

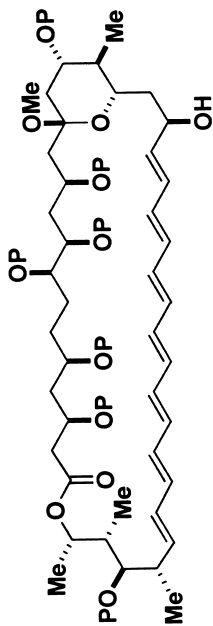

10

P = triethylsilyl

220 200 180 160 140 120 100 80 60 40 20 0 ppm



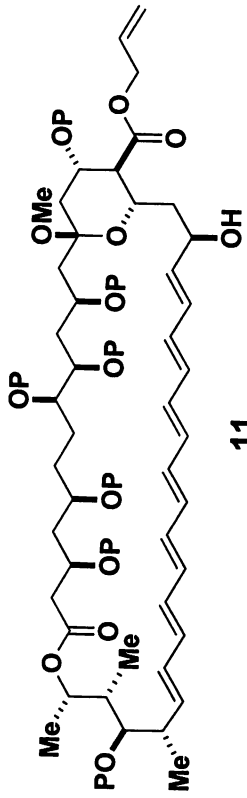

11

P = triethylsilyl

STANDARD PROTON PARAMETERS

Pulse Sequence: s2pul

Solvent: Acetone

Ambient temperature

File: dsp.96a.1h

INOVA-500 "ui500nb"

Pulse 90.0 degrees

Acq. time 4.096 sec

Width 8000.0 Hz

16 repetitions

OBSERVE H1, 500.0755708 MHz

DATA PROCESSING

Line broadening 0.3 Hz

FT size 65536

Total time 8 min, 45 sec

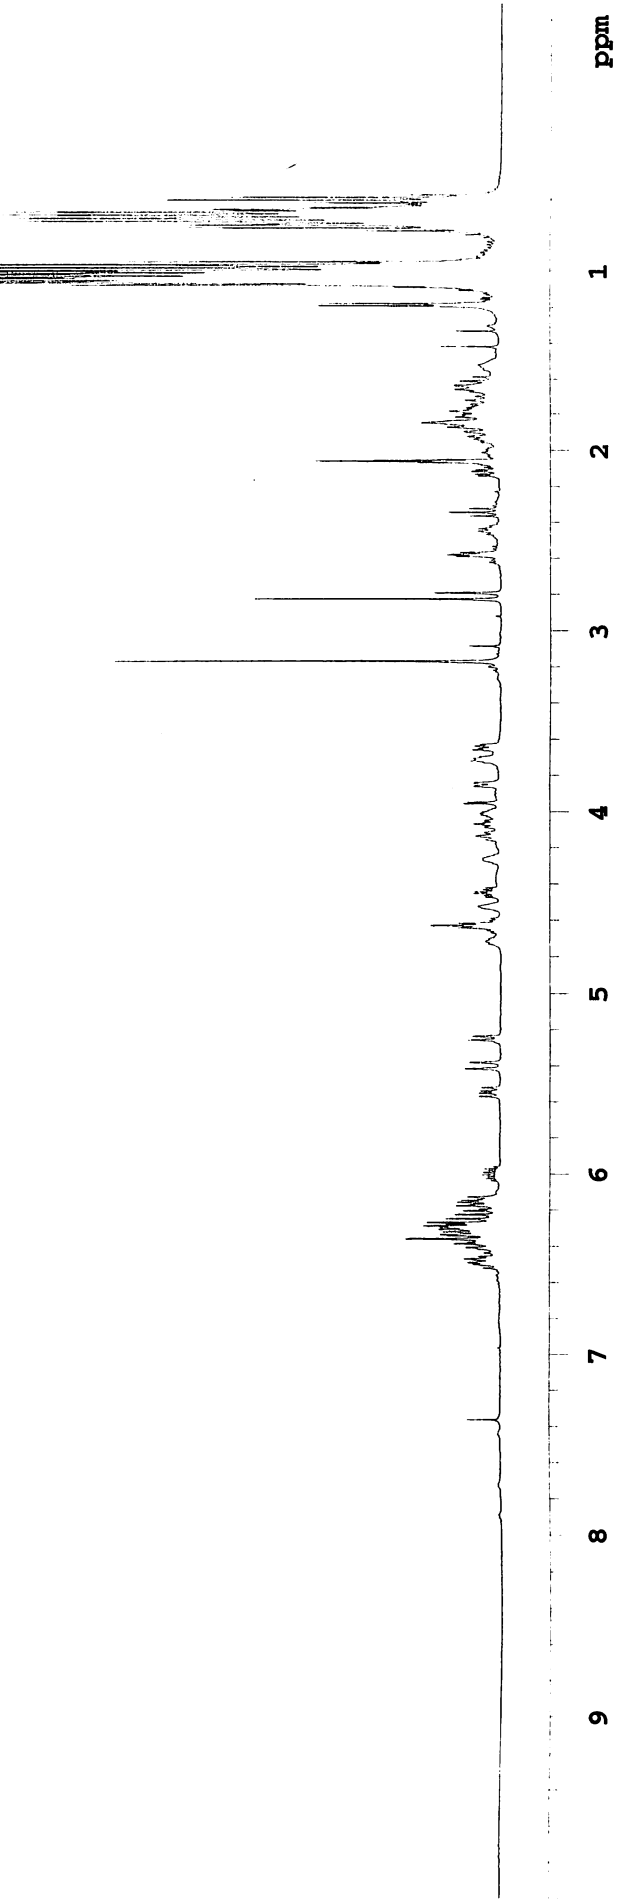

ppm

1

2

3

4

5

6

7

8

9

STANDARD CARBON PARAMETERS

```

exp1 s2pul
SAMPLE
date May 31 2007 dfrq DEC. & VT 499.434
solvent Acetone dn H1
file /export/homs/~ dpwr 44
data/vkr500/Burks/~ dof -827.0
palacios/dsp.96a.1- dm yyy
3c-fid dmm w
ACQUISITION dmf 20202
sfrq 125.596 dseq
tn C13 dres 1.0
at 1.024 homo n
np 65536 DEC2
sw 32000.0 dfrq2 0
fb 18000 dn2 1
bs 16 dpwr2 0
tpwr 53 dof2 n
pw 4.0 dmm2 C
dl 1.000 dmm2 C
tof 1880.0 dmf2 18519
nt 1e+06 dseq2
ct 17750 dres2 1.0
alock n homo2 n
gain not used PROCESSING
flags lb 1.00
il n wtfile
in n proc ft
dp y fn not used
hs nn math f
DISPLAY
sp -2112.1 werr
vp 31999.0 wexp
vs 1884 wbs
sc 0 wnt
wc 250
hzmm 5.57
is 500.00
rf1 5855.5
rfp 3742.4
th 55
nm pb
    
```

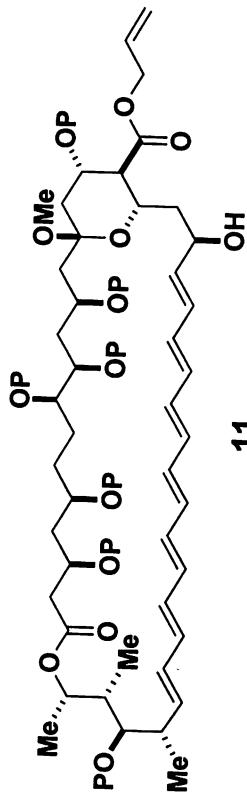

11

P = triethylsilyl

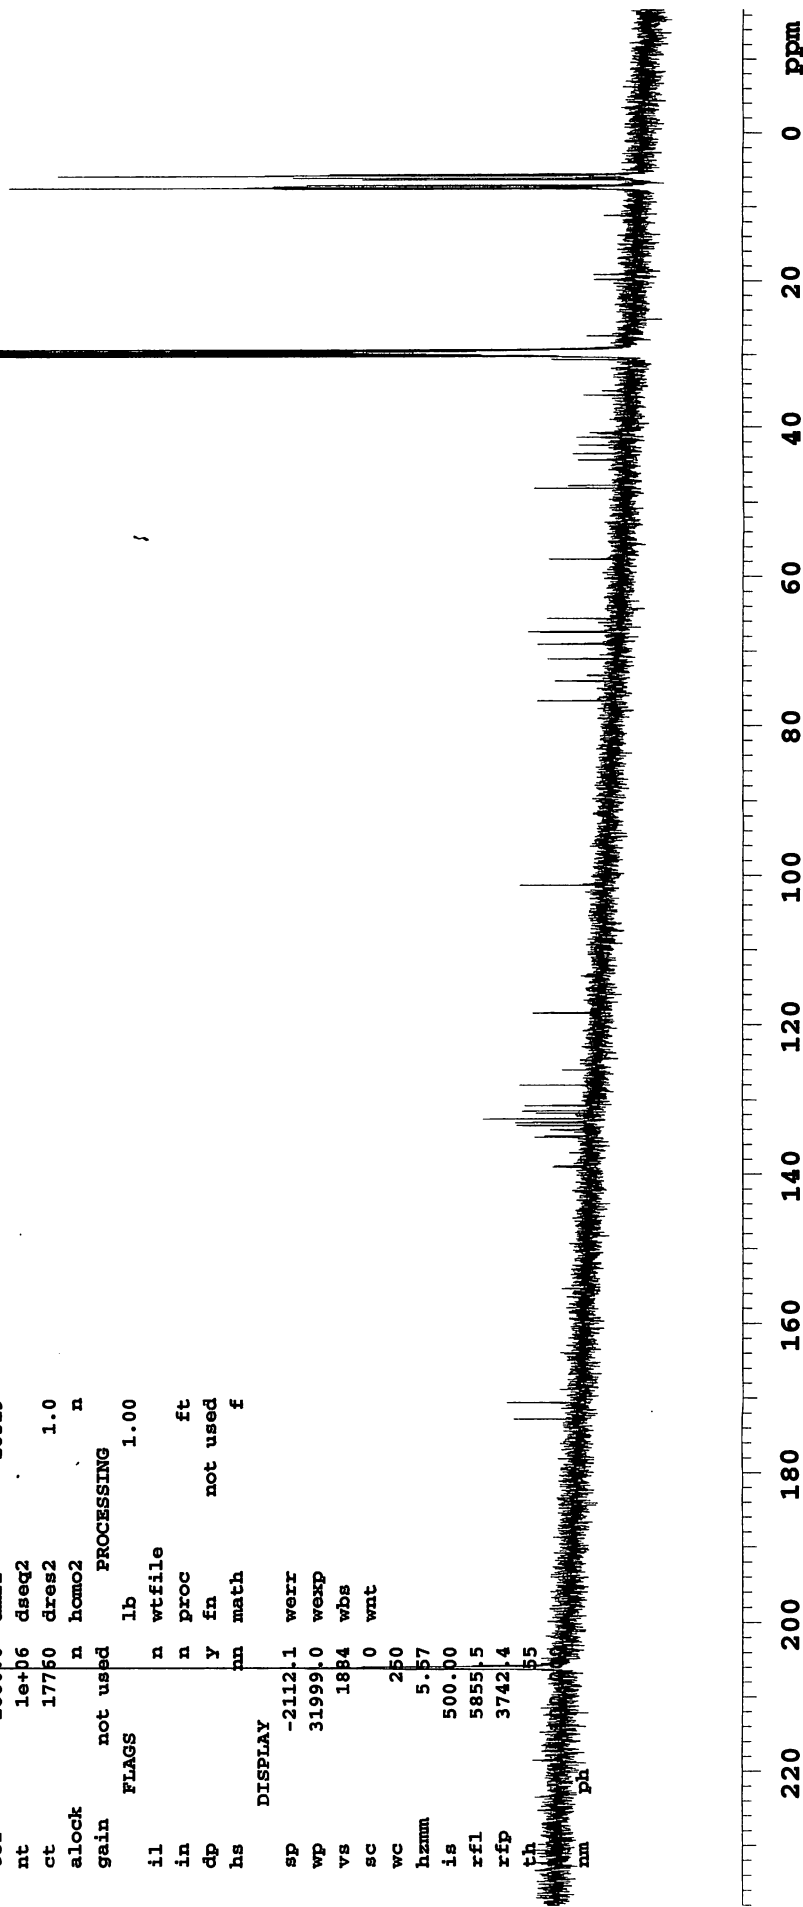

STANDARD PROTON PARAMETERS

```

exp1 s2pul
SAMPLE DEC. & VT
date May 29 2007 dfrq 500.072
solvent CD3OD dn H1
file /export/home/~ dpwr 18
data/ui500nb/Burke- dof 0
/palacios/dsp.62e.- dm nnn
lh.2.fid dnm c
ACQUISITION dmf 200
sfrq 500.072 dseq
tn H1 dres 1.0
at 4.096 homo n
np 65536 DEC2
sw 8000.0 dfrq2 0
fb 4000 dn2
bs 4 dpwr2 1
tpwr 55 dof2 0
pw 7.7 dm2 n
dl 0 dnm2 c
tof 0 dmf2 200
nt 128 dseq2
ct 24 dres2 1.0
alock n homo2 n
gain not used PROCESSING
flags lb 0.30
il n wtfile
in n proc ft
dp y fn 262144
hs nn math f
DISPLAY
sp -250.1 werr
wp 5250.7 wexp
vs 1439 wbs
sc 0 wnt
wc 250
hzmm 21.00
is 33.57
rf1 1510.8
rfp 0
th 7
ins 100.000
ai cdc ph
    
```

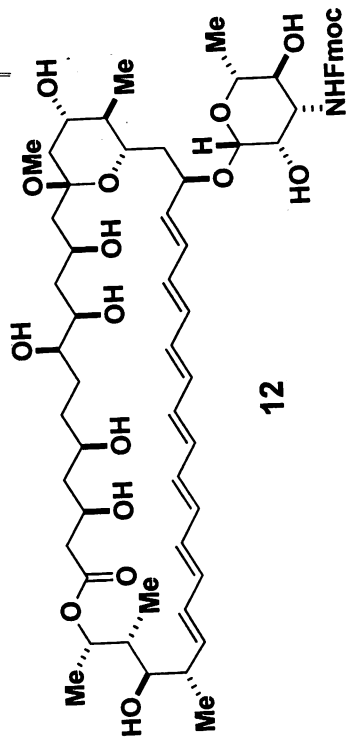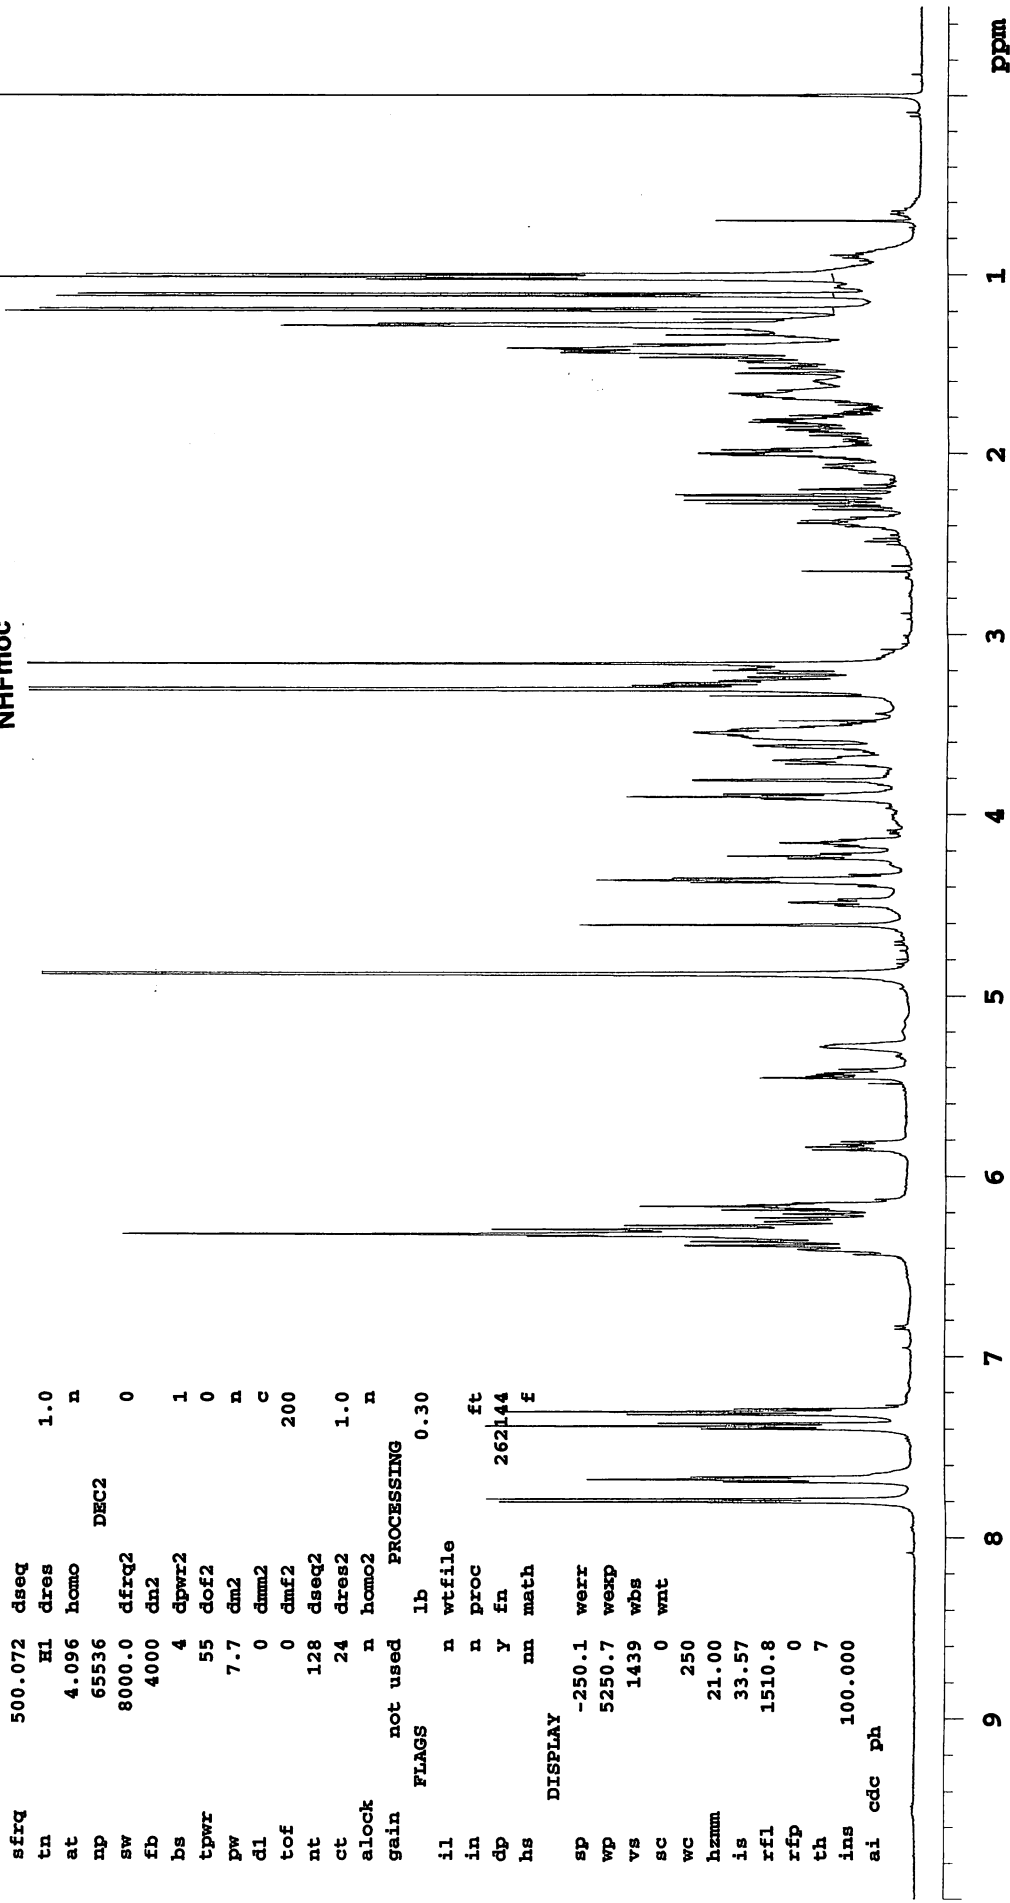

STANDARD CARBON PARAMETERS

exp1 s2pul

|                  |              |
|------------------|--------------|
| SAMPLE           | DEC. & VT    |
| date May 28 2007 | dfrq 499.700 |
| solvent CD3OD    | dn H1        |
| file exp         | dpwr 44      |
| ACQUISITION      | dof -827.6   |
| sfrq 125.663     | dm YYY       |
| tn C13           | dmm w        |
| at 1.086         | dmf 12000    |
| np 65536         | dseq 90.0    |
| sw 30165.9       | dres n       |
| fb 16600         | hcmo n       |
| bs 16            | PROCESSING   |
| ss 1             | lb 1.00      |
| tpwr 53          | wtfile       |
| pw 6.0           | proc ft      |
| d1 1.000         | fn not used  |
| tof 1884.7       | math f       |
| nt 100000        |              |
| ct 12960         | werr         |
| alock n          | wexp         |
| gain not used    | wbs          |
| FLAGS            | wnt          |
| il n             |              |
| in n             |              |
| dp y             |              |
| hs nn            |              |
| DISPLAY          |              |
| sp -1261.2       |              |
| wp 30165.9       |              |
| vs 3829          |              |
| sc 0             |              |
| wc 250           |              |
| hzmm 12.61       |              |
| is 500.00        |              |
| rfl 1261.2       |              |
| rfp 0            |              |
| th 68            |              |
| ins 100.000      |              |
| nm ph            |              |

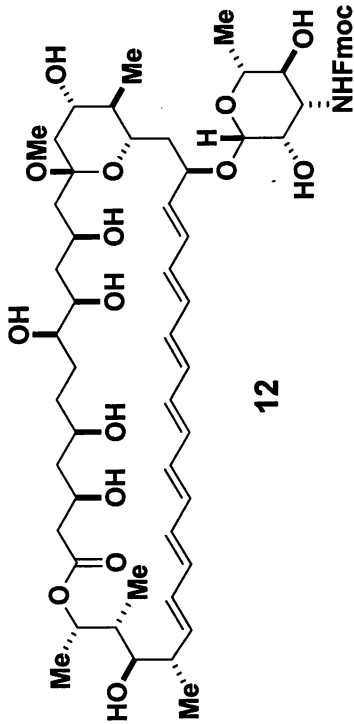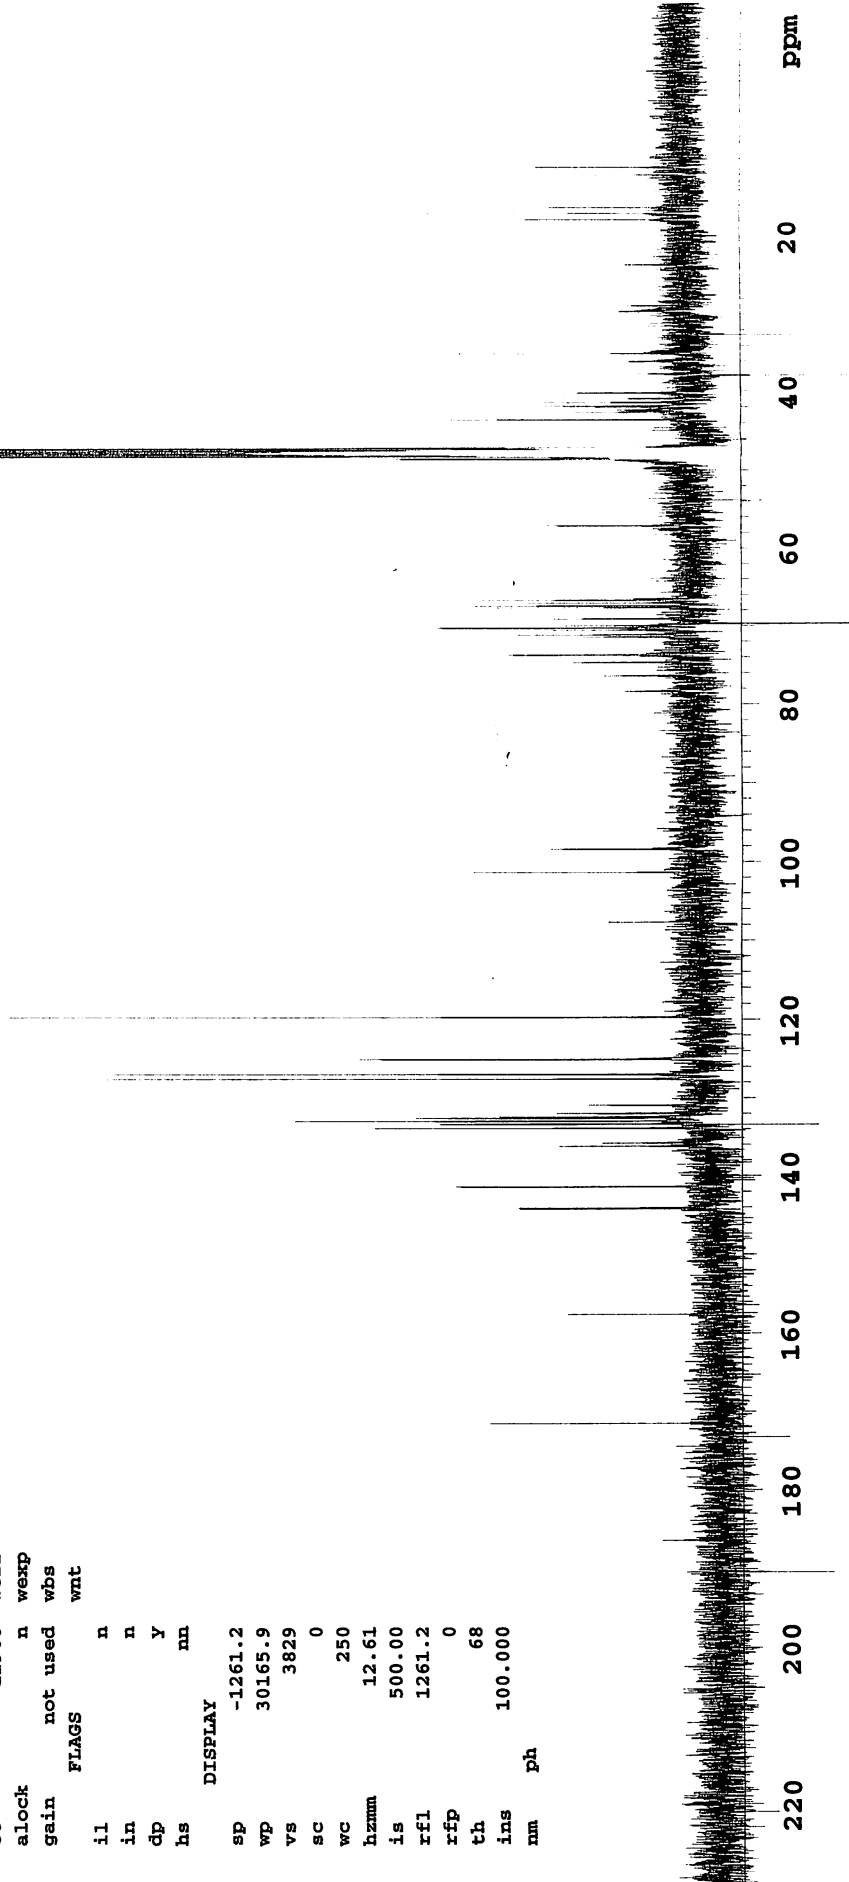

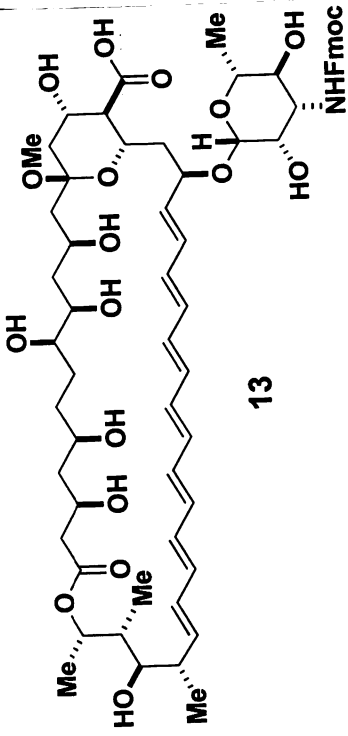

13

## STANDARD PROTON PARAMETERS

Pulse Sequence: s2pul  
 Solvent: pyridine  
 Ambient temperature  
 File: dsp.5n.1h  
 INOVA-500 "ui500nb"  
 Pulse 90.0 degrees  
 Acq. time 4.096 sec  
 Width 8000.0 Hz  
 16 repetitions  
 OBSERVE H1, 500.0729277 MHz  
 DATA PROCESSING  
 Line broadening 0.3 Hz  
 FT size 262144  
 Total time 8 min, 45 sec

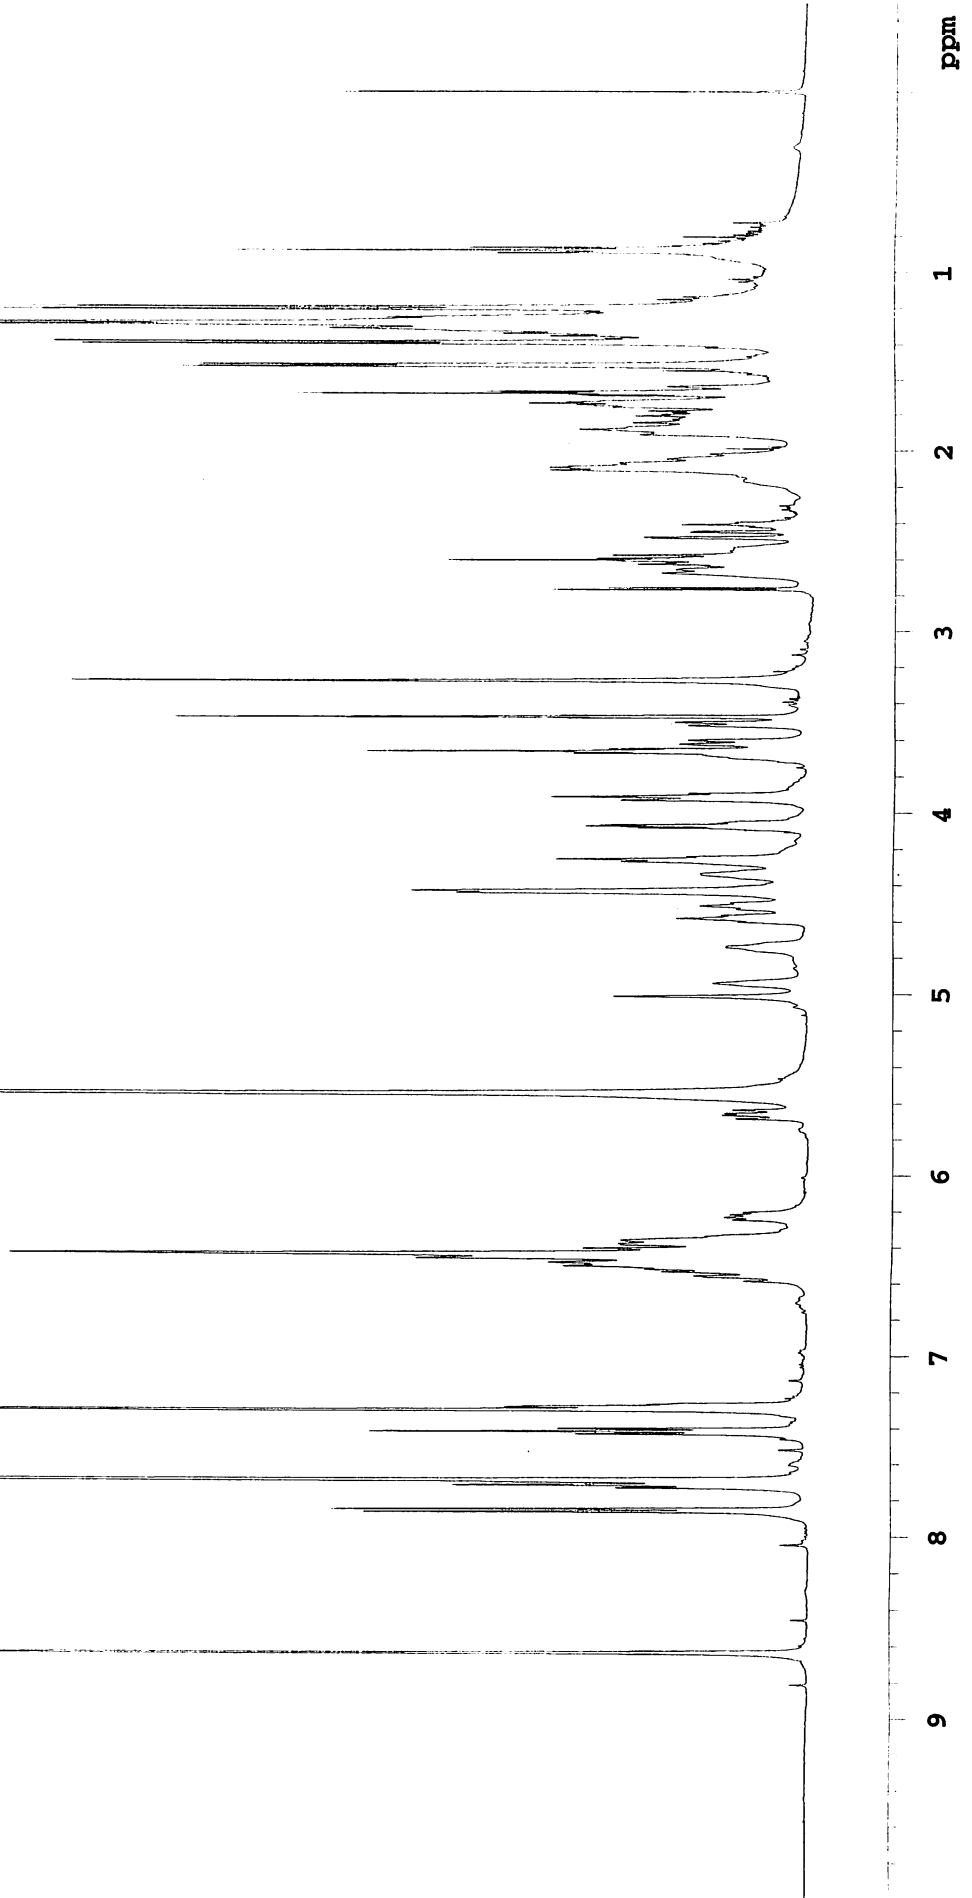

ppm

1

2

3

4

5

6

7

8

9

STANDARD CARBON PARAMETERS

Pulse Sequence: s2pul  
 Solvent: pyridine  
 Ambient temperature  
 User: 1-14-87  
 INOVA-500 "vkr500"

Relax. delay 2.000 sec  
 Pulse 53.3 degrees  
 Acq. time 1.022 sec  
 Width 32051.3 Hz  
 9504 repetitions  
 OBSERVE C13, 125.5816777 MHZ  
 DECOUPLE H1, 499.4314090 MHZ  
 Power 44 dB  
 continuously on  
 WALTZ-16 modulated  
 DATA PROCESSING  
 Line broadening 1.0 Hz  
 FT size 65536  
 Total time 842 hr, 1 min, 5 sec

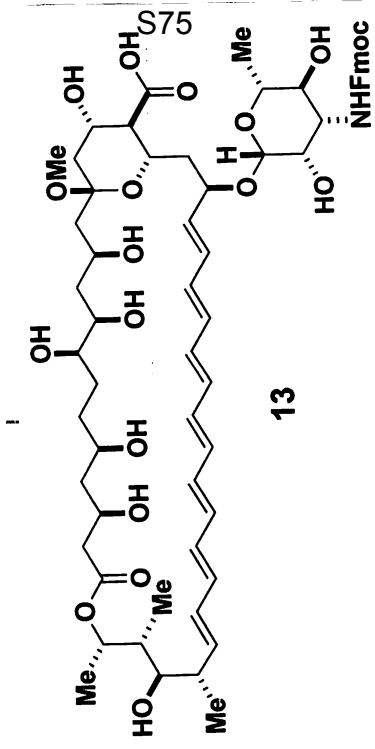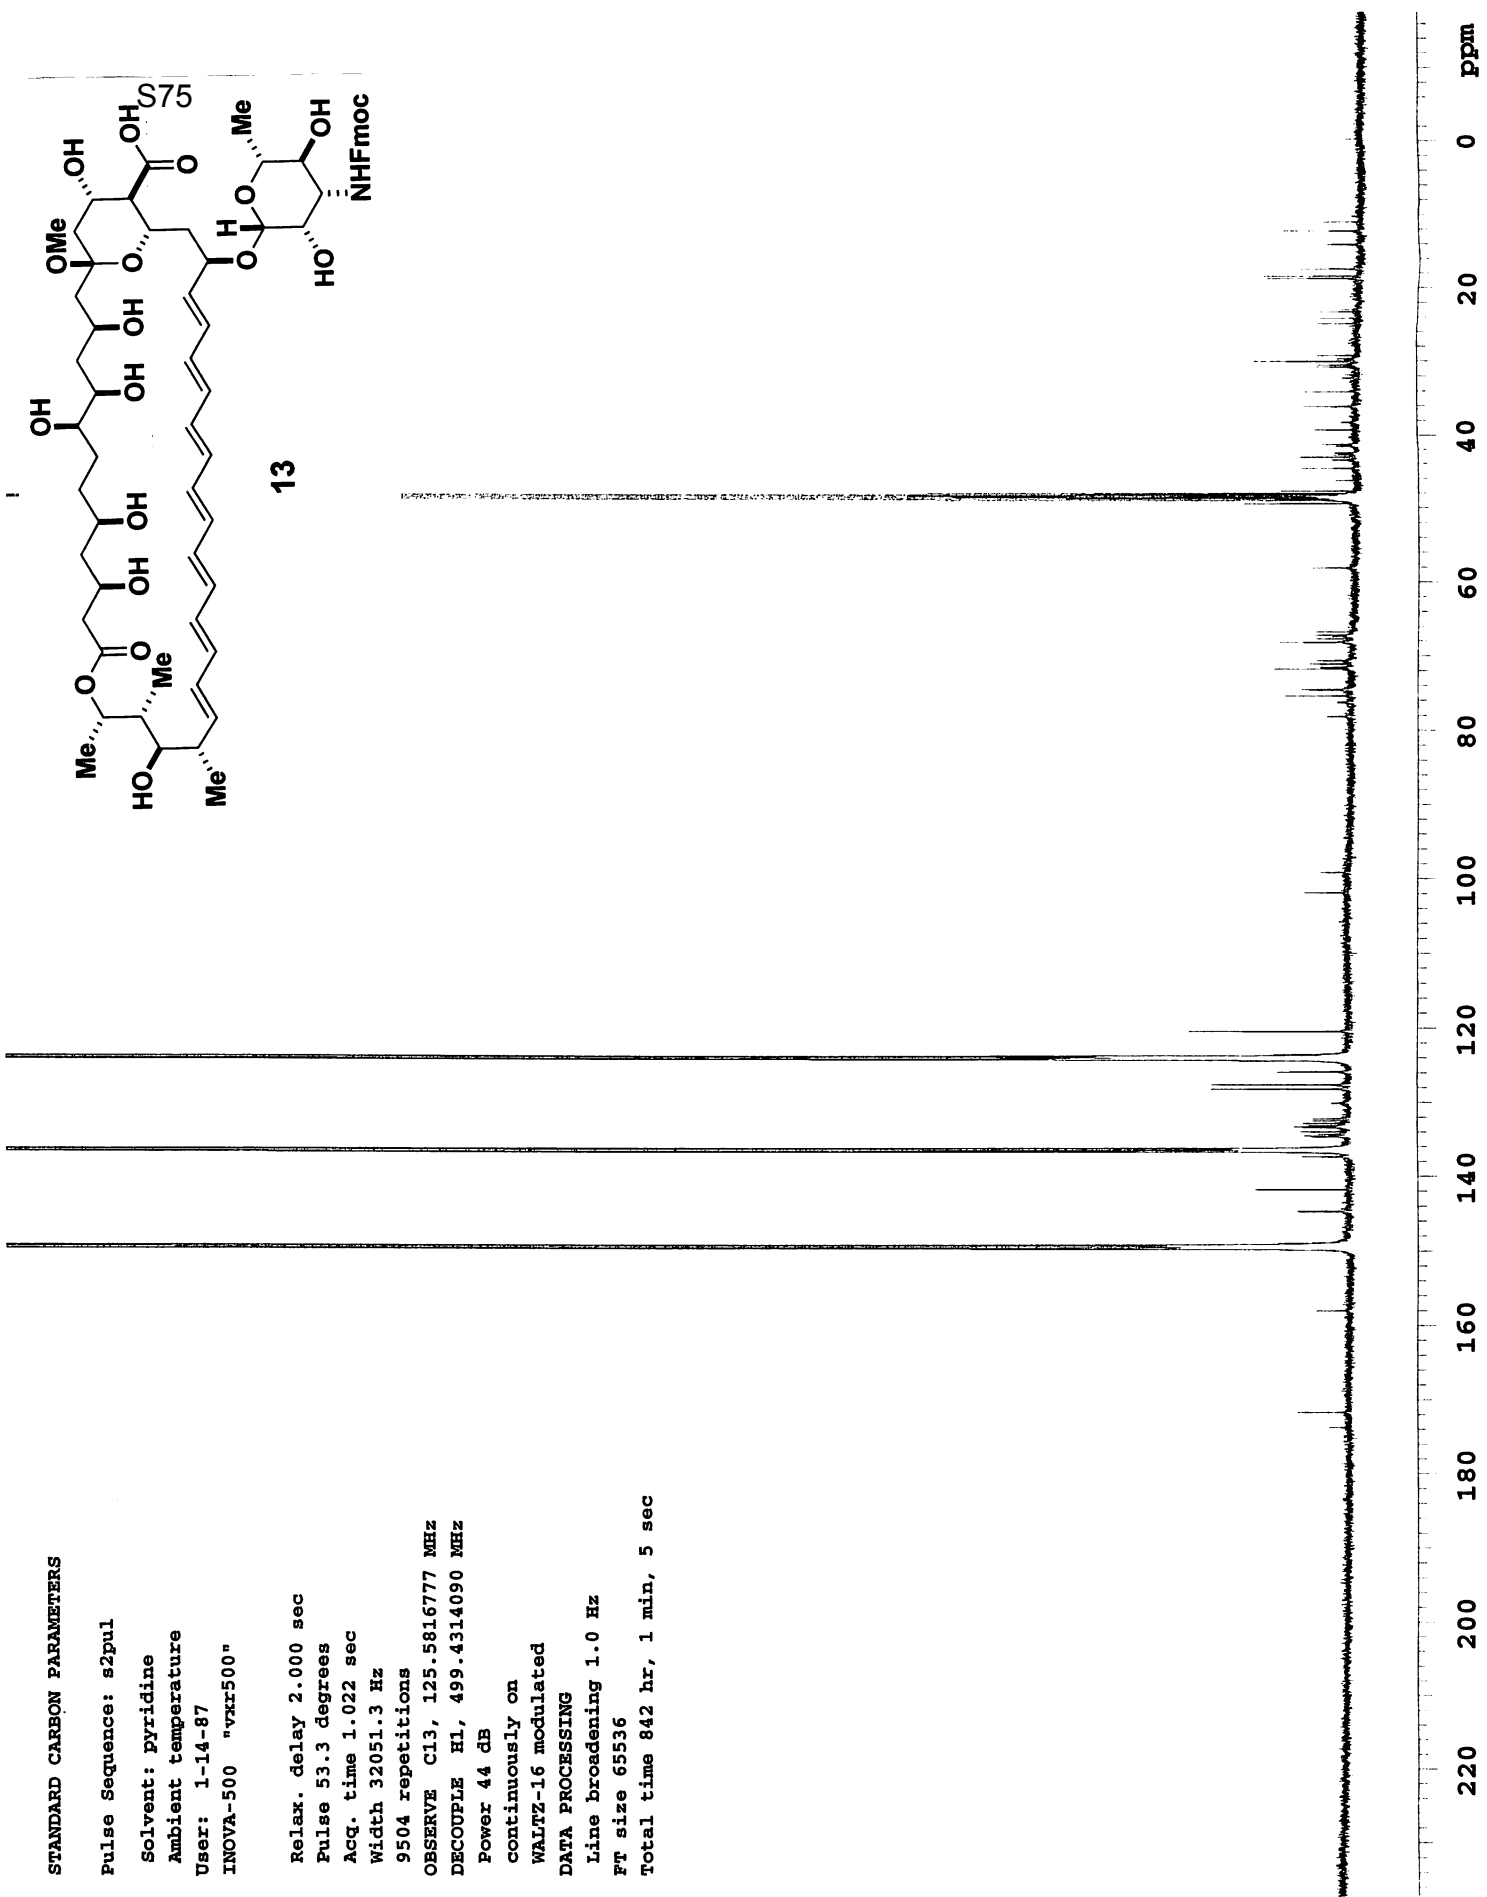

## STANDARD PROTON PARAMETERS

Pulse Sequence: s2pul

Solvent: Acetone  
Ambient temperature  
File: dsp52c.9.2.06  
INOVA-500 "ui500nb"Pulse 90.0 degrees  
Acq. time 4.096 sec  
Width 8000.0 Hz  
12 repetitions  
OBSERVE H1, 500.0755801 MHz  
DATA PROCESSING  
Line broadening 0.3 Hz  
Ft size 131072  
Total time 8 min, 45 sec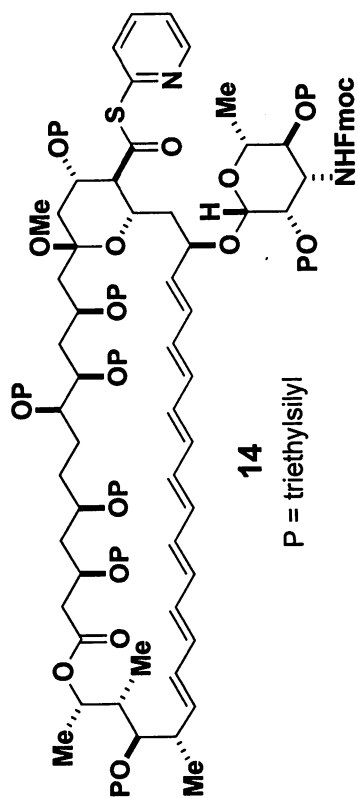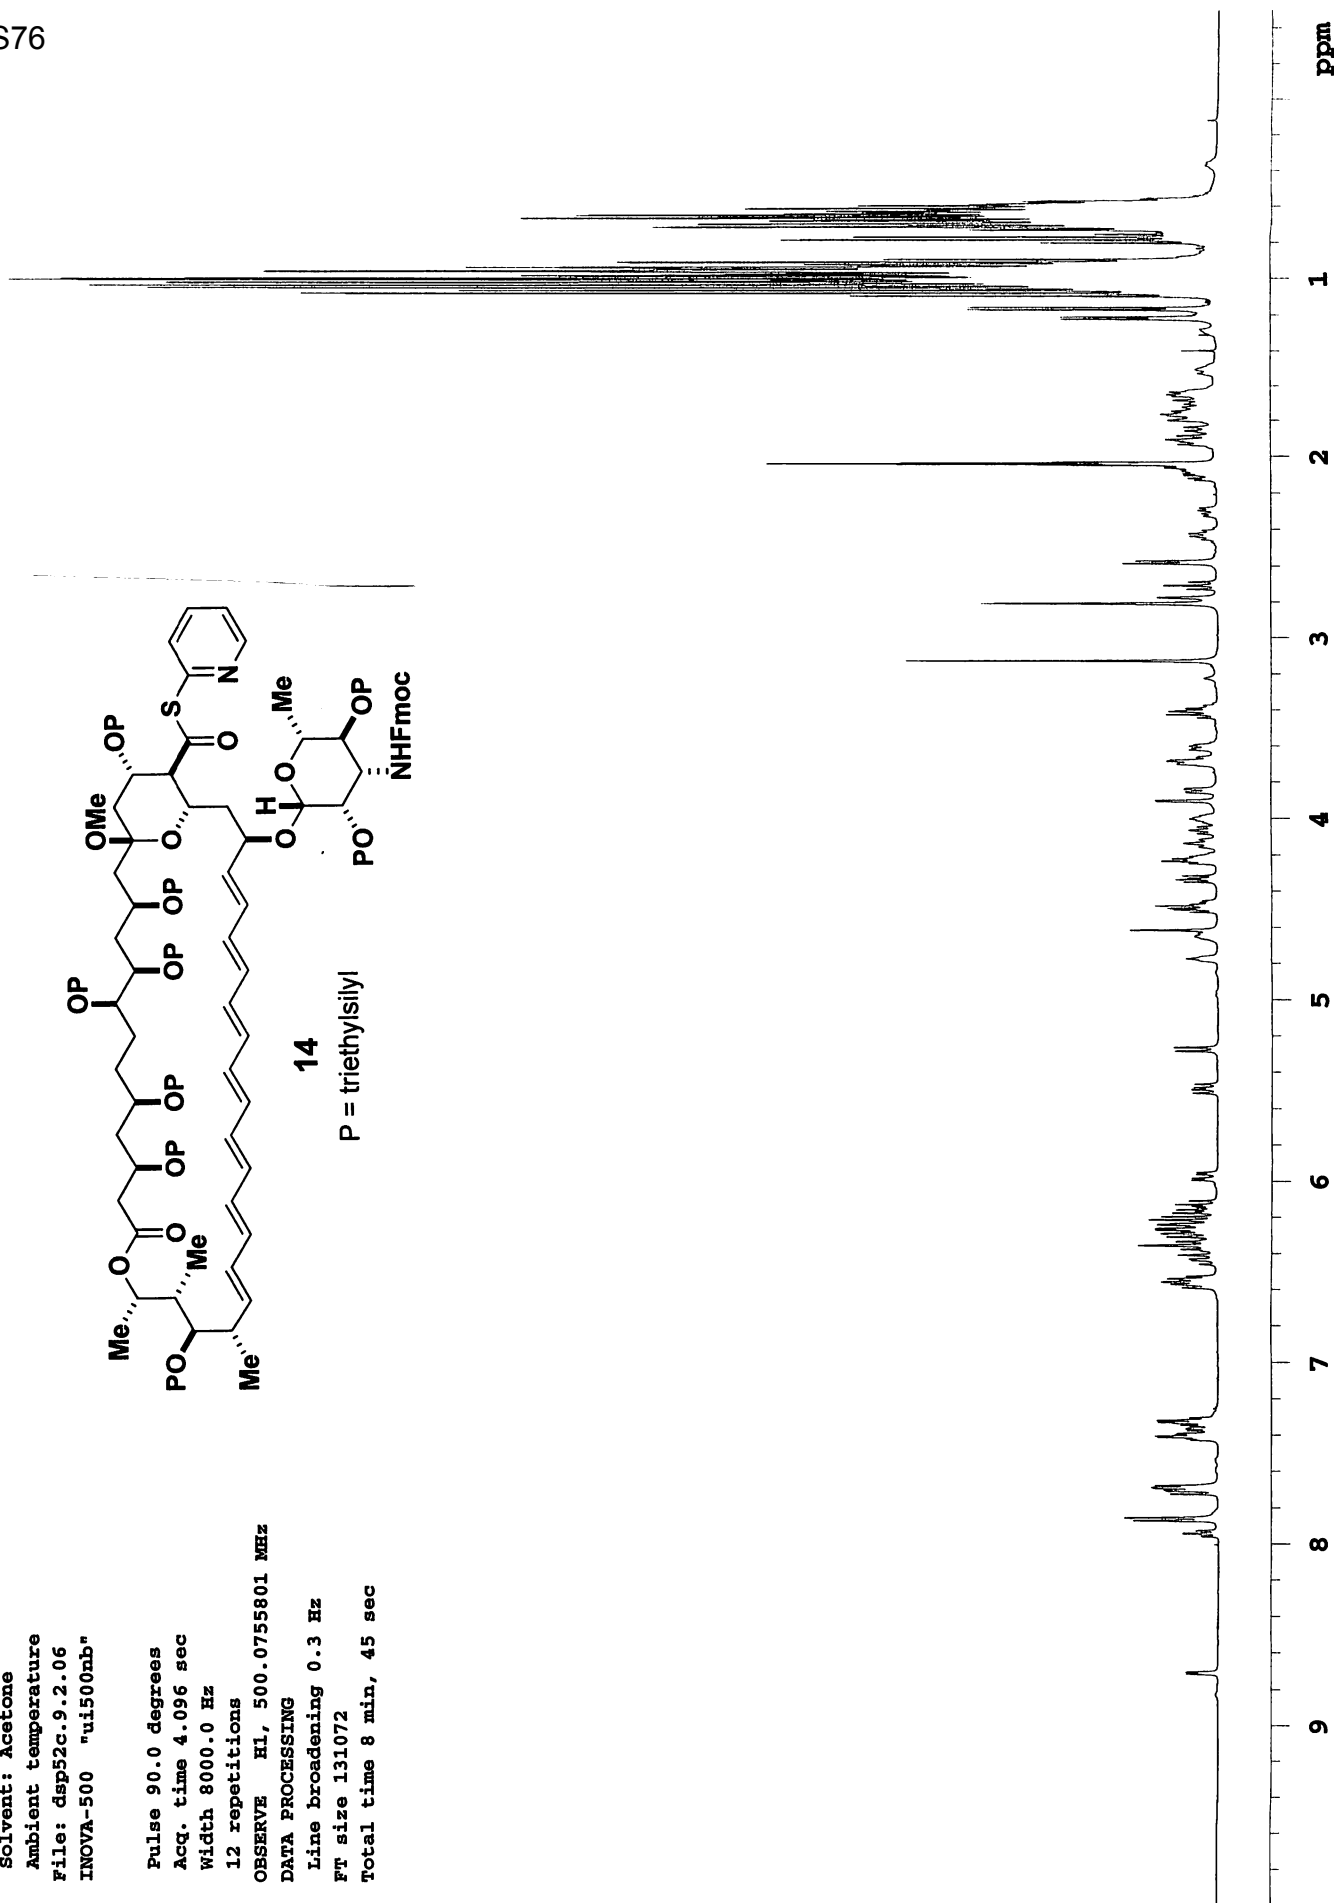

STANDARD CARBON PARAMETERS

Pulse Sequence: s<sup>2</sup>pul

Solvent: Acetone

Ambient temperature

User: 1-14-87

UNITY-500 "vvr500"

Relax. delay 3.000 sec

Pulse 55.4 degrees

Acq. time 1.024 sec

Width 32000.0 Hz

7488 repetitions

OBSERVE C13, 125.5838716 MHz

DECOUPLE H1, 499.4401296 MHz

Power 44 dB

continuously on

WALTZ-16 modulated

DATA PROCESSING

Line broadening 1.0 Hz

FT size 65536

Total time 112 hr, 4 min, 50 sec

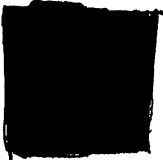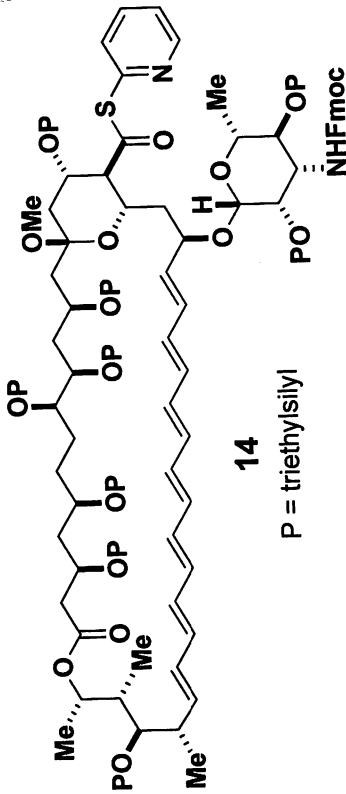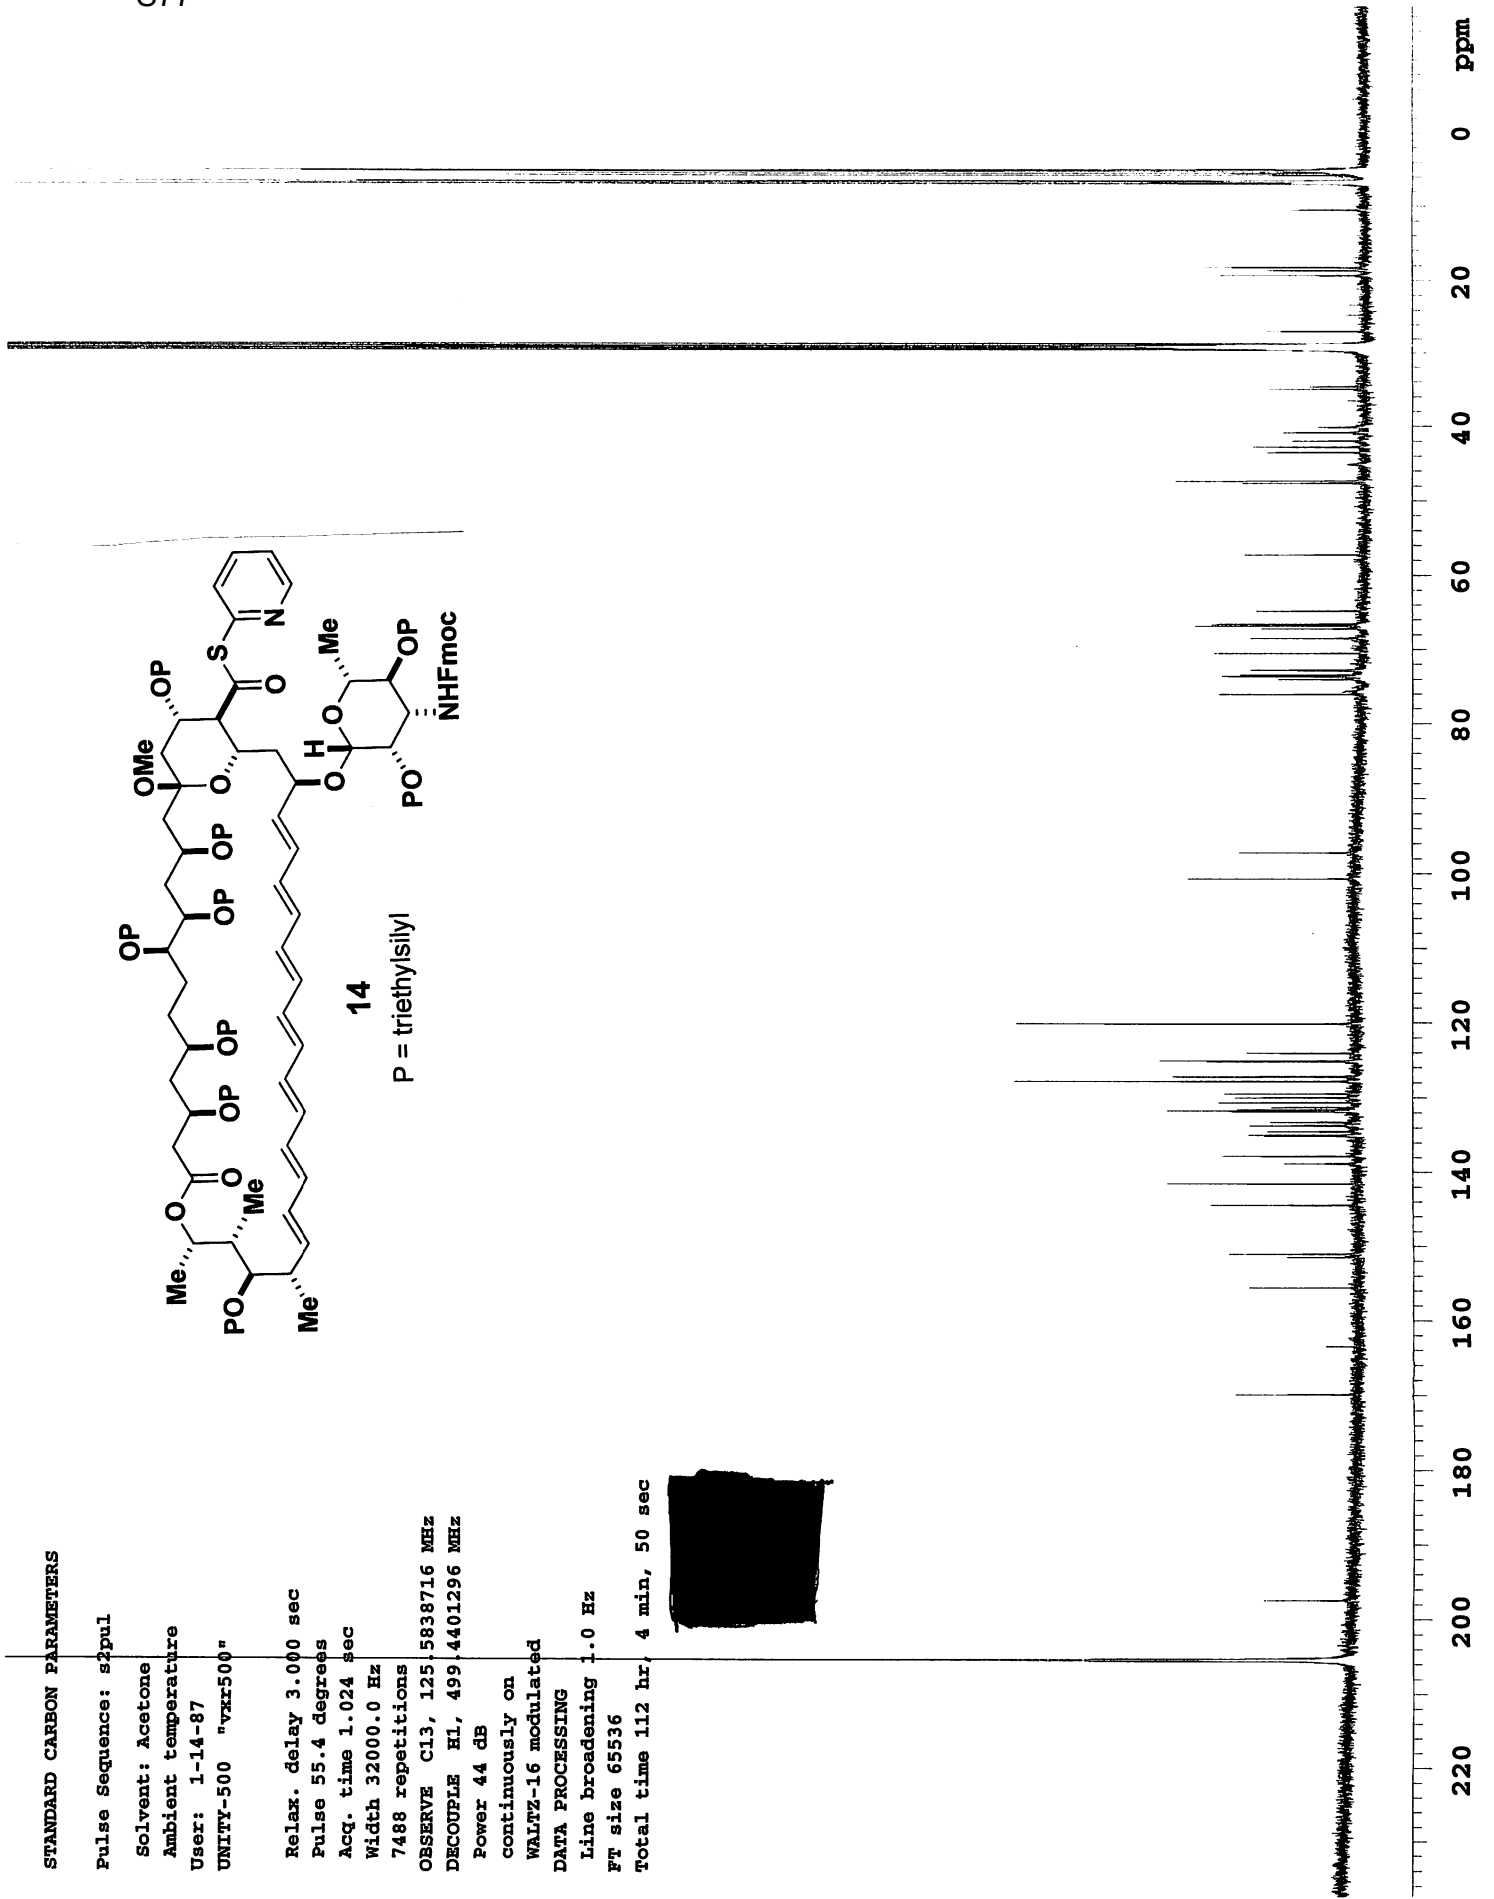



STANDARD PROTON PARAMETERS

Pulse Sequence: s2pul

Solvent: Acetone

Ambient temperature

INOVA-500 "ui500nb"

Pulse 90.0 degrees

Acq. time 4.096 sec

Width 8000.0 Hz

16 repetitions

OBSERVE H1, 500.075801 MHz

DATA PROCESSING

Line broadening 0.3 Hz

FT size 262144

Total time 8 min, 45 sec

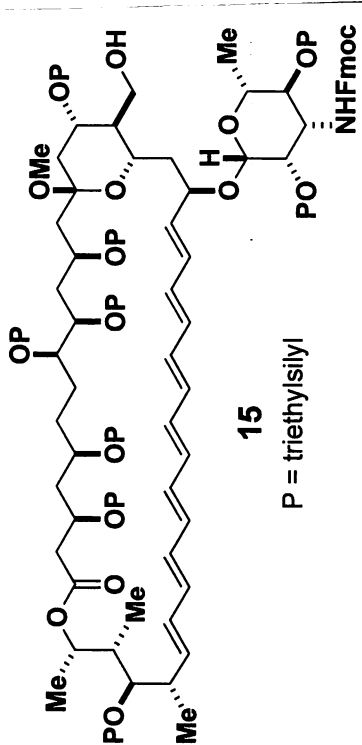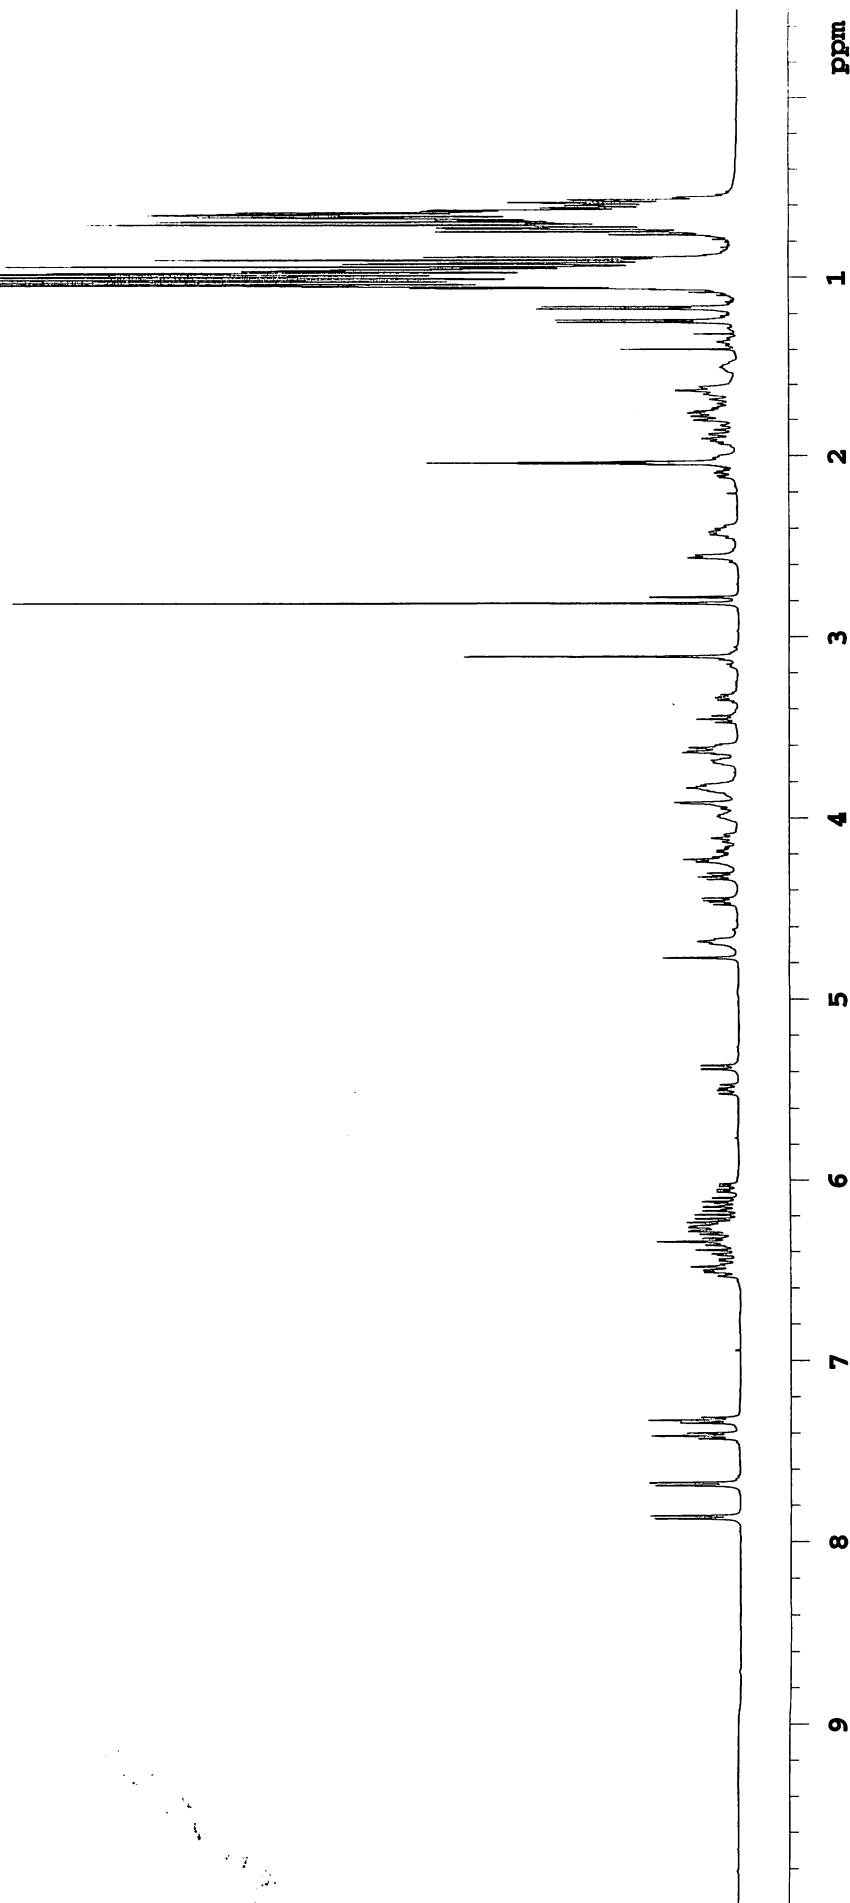

STANDARD CARBON PARAMETERS

```

exp1 s2pul
SAMPLE
date May 26 2007 dfrq 499.701
solvent Acetone dn H1
file exp dn 44
ACQUISITION
sfrq 125.663 dm -827.6
tn C13 dnm w
at 1.086 dmf 12000
np 65536 dseq 90.0
sw 30165.9 dres n
fb 16600 homo n
bs 16 PROCESSING
ss 1 lb 1.00
tpwr 53 wtfile
pw 6.0 proc ft
dl 1.000 fn not used f
tof 1884.7 math f
nt 10000
ct 512 werr
alock n wexp
gain not used wbs
FLAGS
il n
in n
dp y
hs nn
DISPLAY
sp -1261.1
wp 30165.9
vs 140
sc 0
wc 250
hzmm 4.90
is 500.00
rfl 1261.1
rfp 0
th 68
ins 100.000
nm ph
    
```

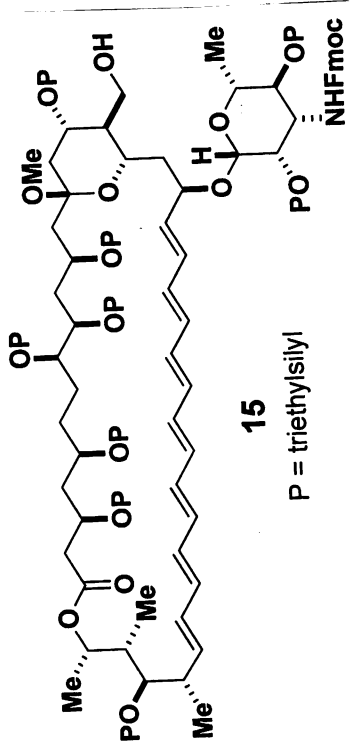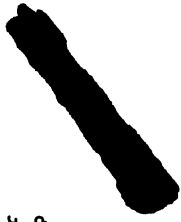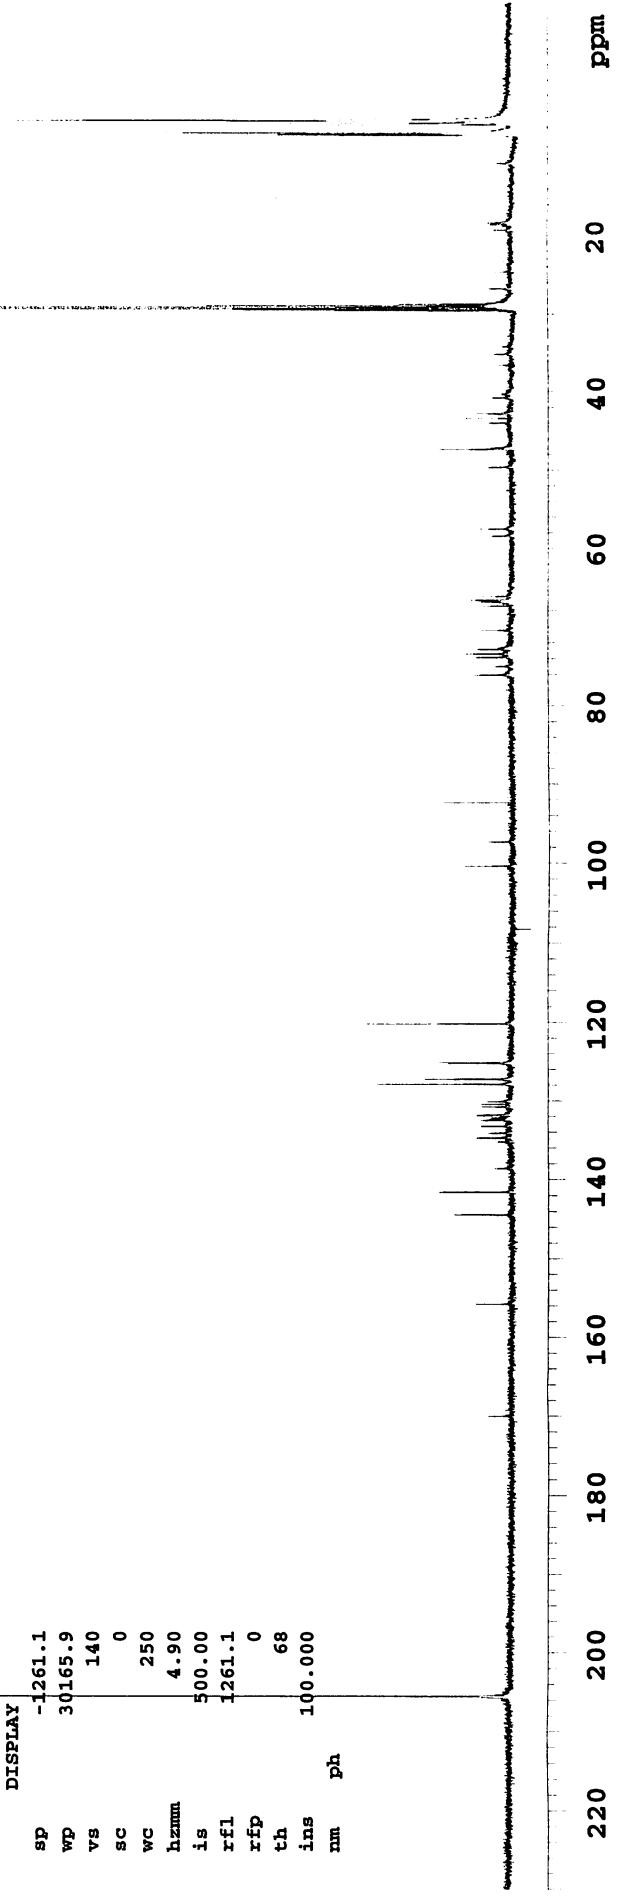

STANDARD PROTON PARAMETERS

```

exp1 s2pul
SAMPLE DEC. & VT
date May 2 2007 dfrq 500.070
solvent CDCl3 dn H1
file exp dpwr 18
ACQUISITION dof 0
sfrq 500.070 dm nmn
tn H1 dnm c
at 4.096 dmf 200
np 98300 dseq 1.0
sw 11999.4 dres n
fb 7000 homo
bs 4 DEC2
tpwr 55 dfrq2 0
pw 7.7 dn2
d1 0 dpwr2 1
tof 0 dof2 0
nt 128 dm2 n
ct 12 dnm2 c
alock n dmf2 200
gain not used dseq2
flags dres2 1.0
il n homo2 n
in n PROCESSING
dp y lb 0.30
hs mn wfile
DISPLAY proc ft
sp -250.2 fn not used
wp 5250.7 math f
vs 205
sc 0 werr
wc 250 wexp
hzmm 21.00 wbs
is 33.57 wnt
rf1 7132.5
rfp 1020.1
th 7
ins 100.000
ai cdc ph
    
```

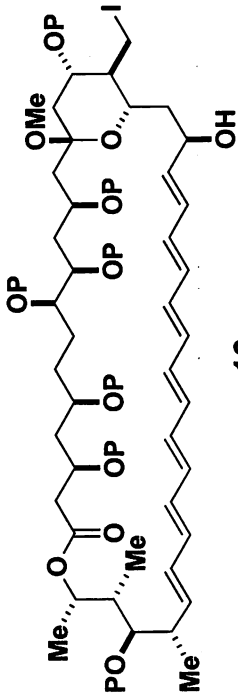

16

P = triethylsilyl

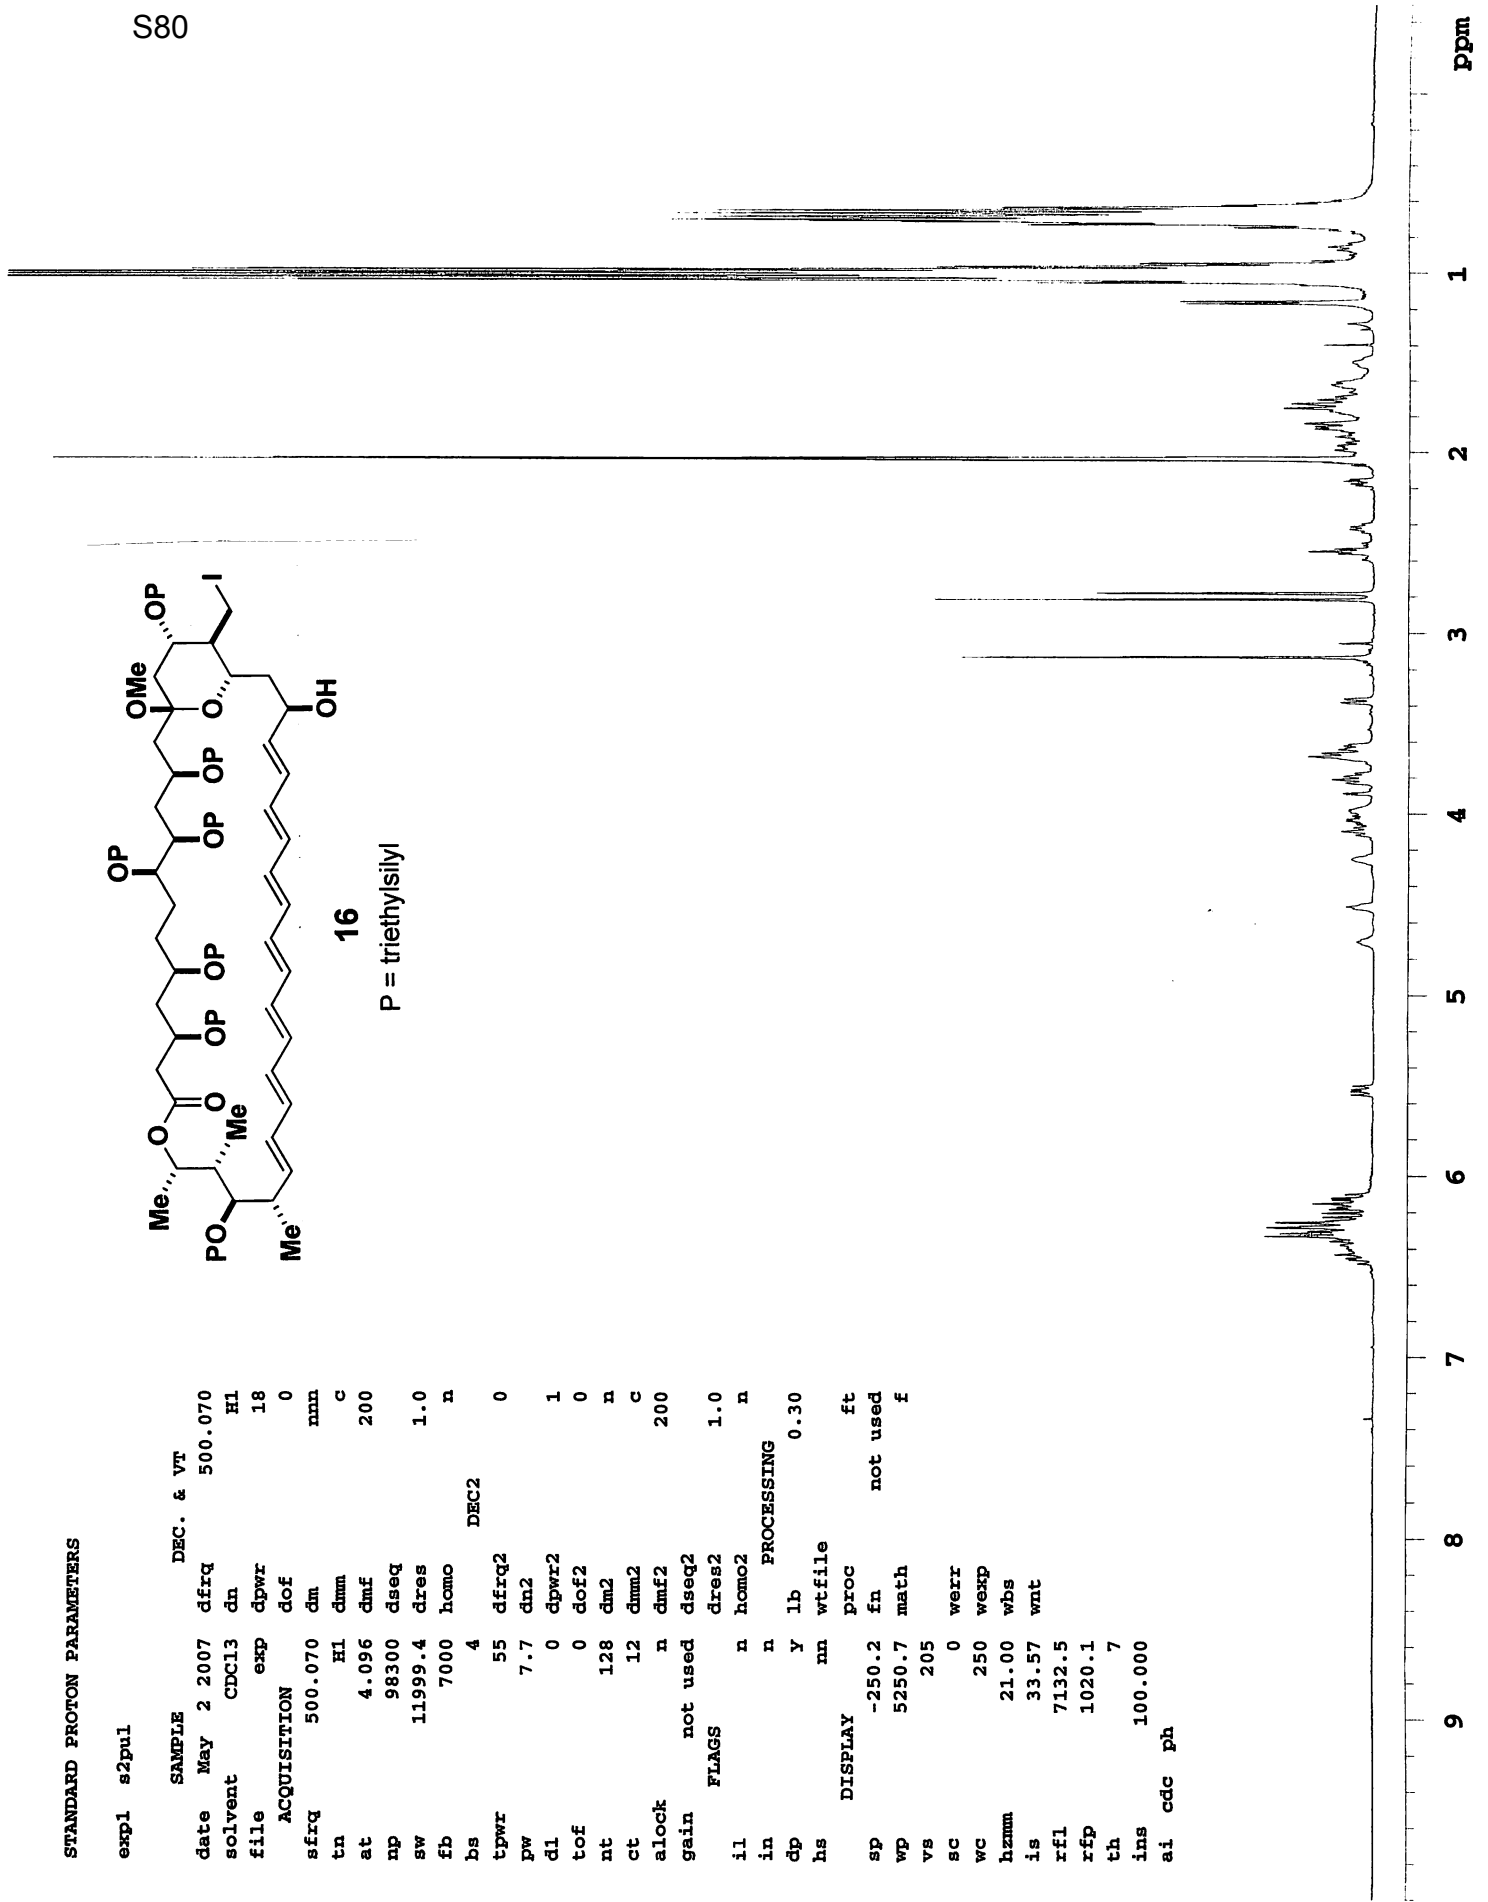

ppm

1

2

3

4

5

6

7

8

9

STANDARD CARBON PARAMETERS

Pulse Sequence: s2pul

Solvent: Acetone

Ambient temperature

User: 1-14-87

File: dsp.80e.13c

INOVA-500 "sunds1"

Relax. delay 1.000 sec

Pulse 53.3 degrees

Acq. time 0.511 sec

Width 32051.3 Hz

22608 repetitions

OBSERVE C13, 125,5819257 MHZ

DECOUPLE H1, 499,4341558 MHZ

Power 44 dB

continuously on

WALTZ-16 modulated

DATA PROCESSING

Line broadening 1.0 Hz

FT size 262144

Total time 42 hr, 13 min, 28 sec

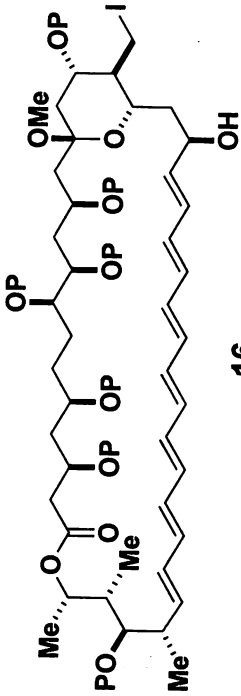

16

P = triethylsilyl

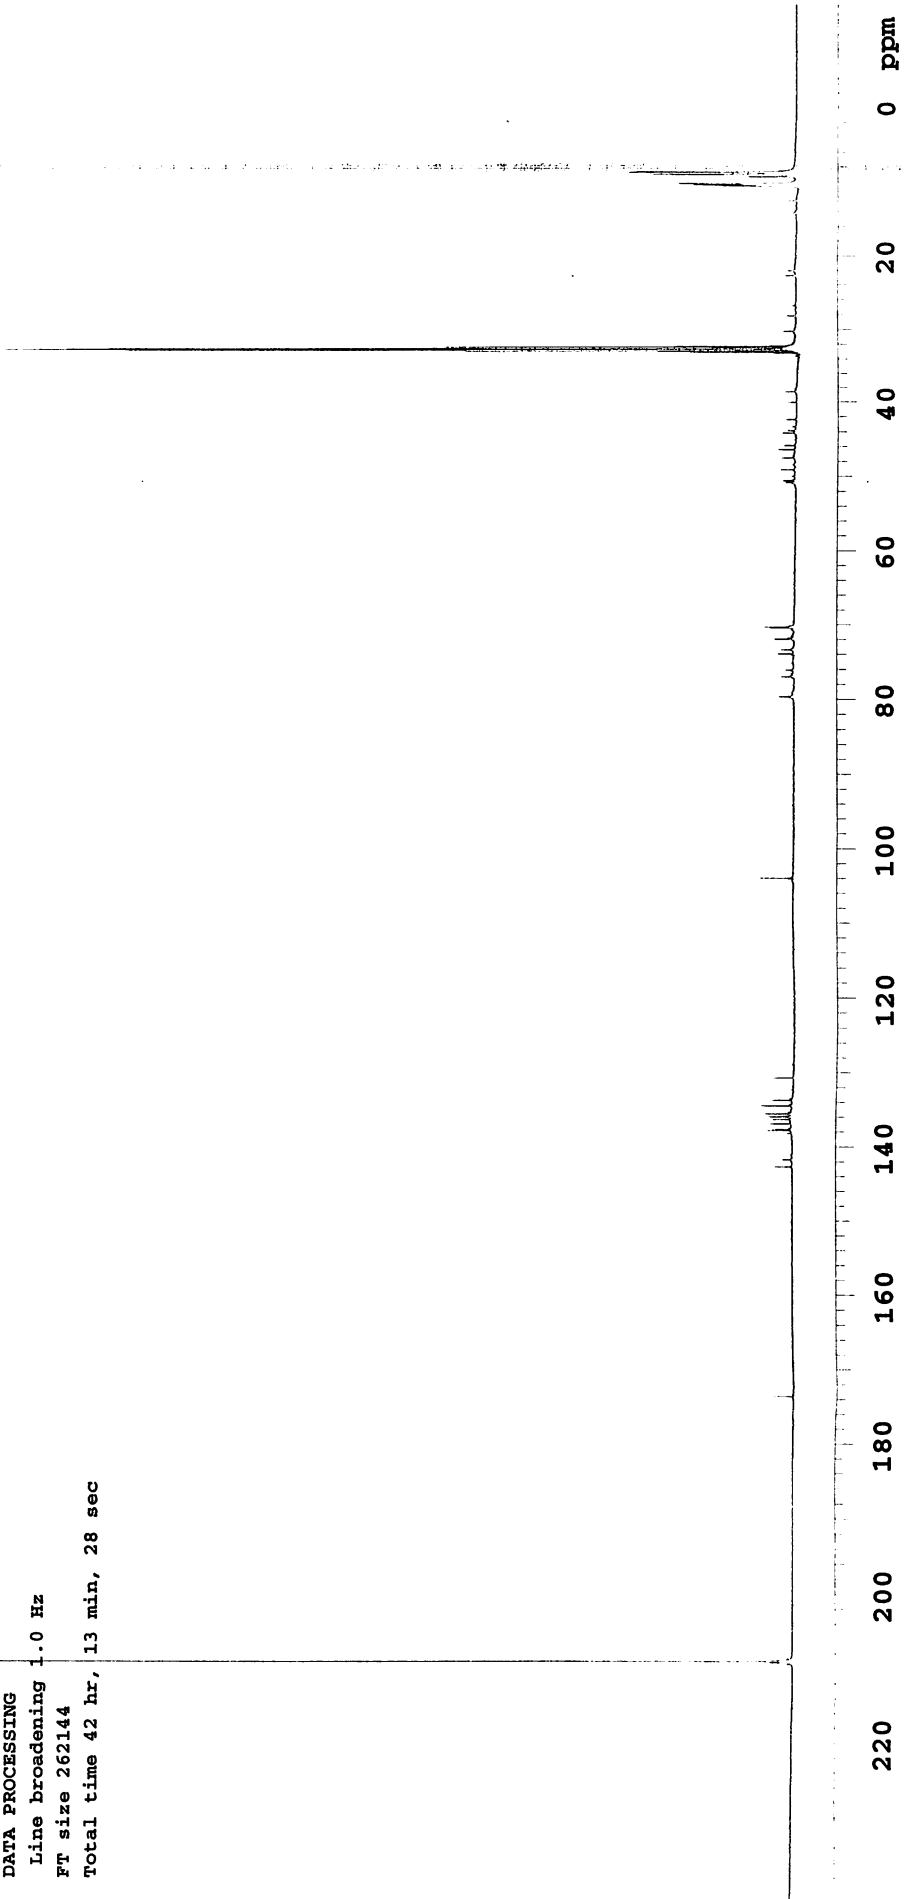

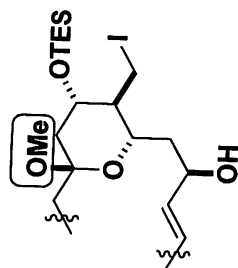

d.r. was obtained by integrating the methyl ketal singlet in the crude mixture

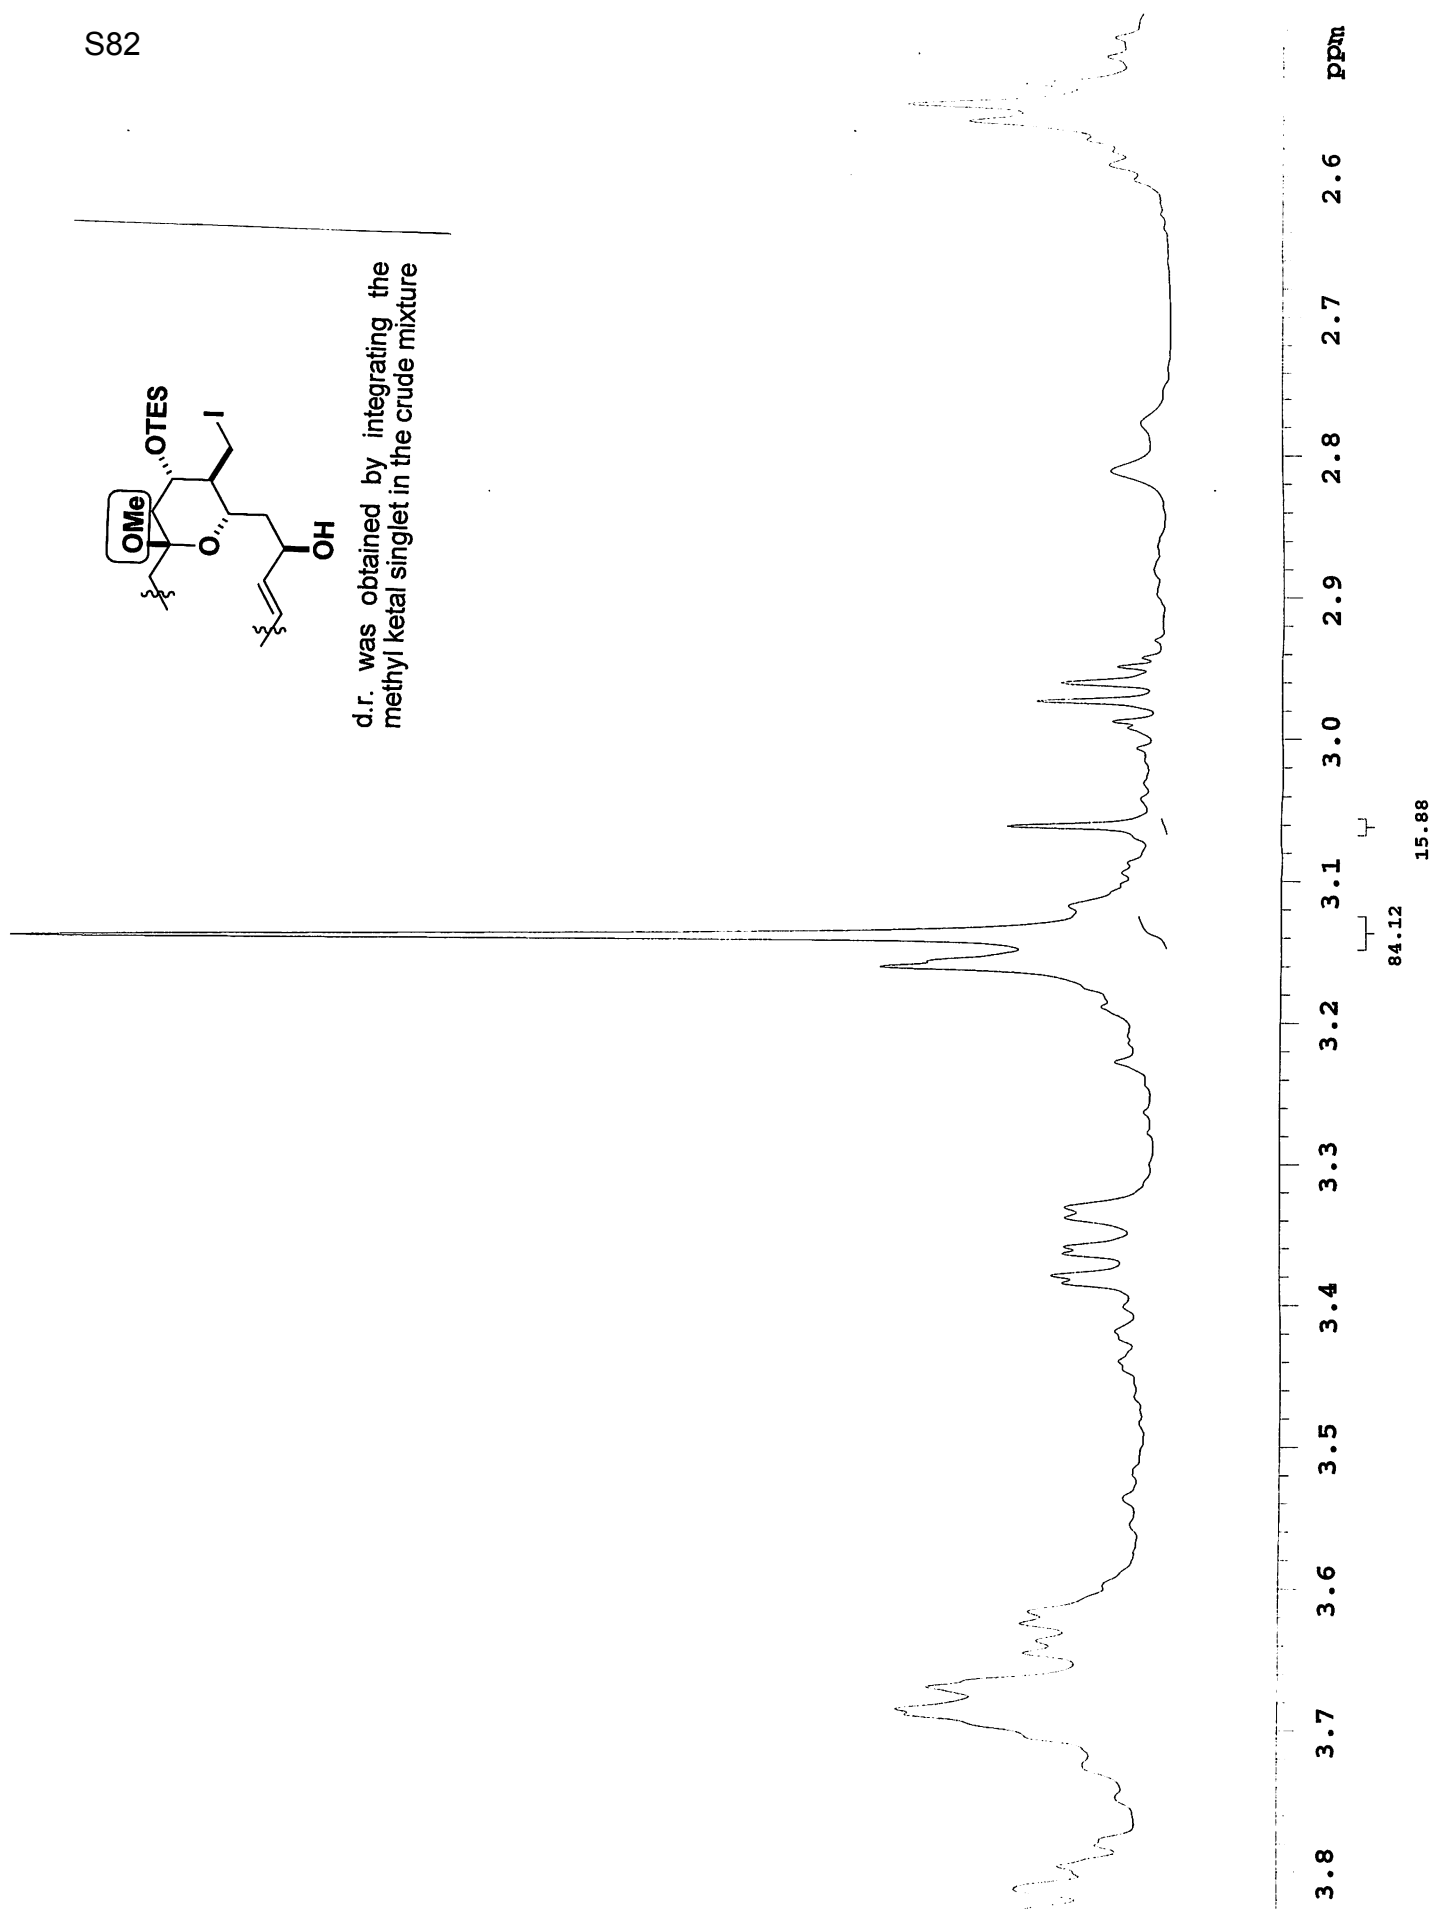

TMA.4E.Purified.1E.PyrMeOE.11.17.06

Pulse Sequence: s2pul

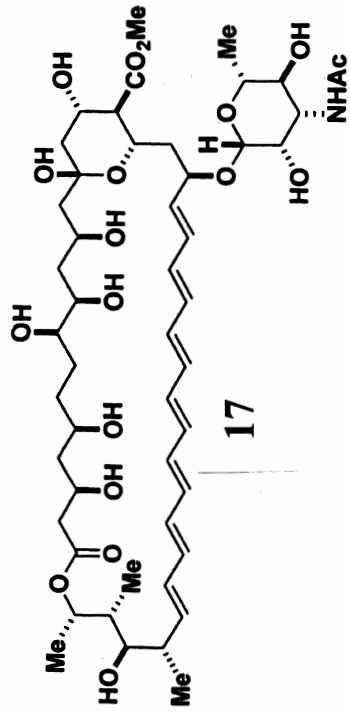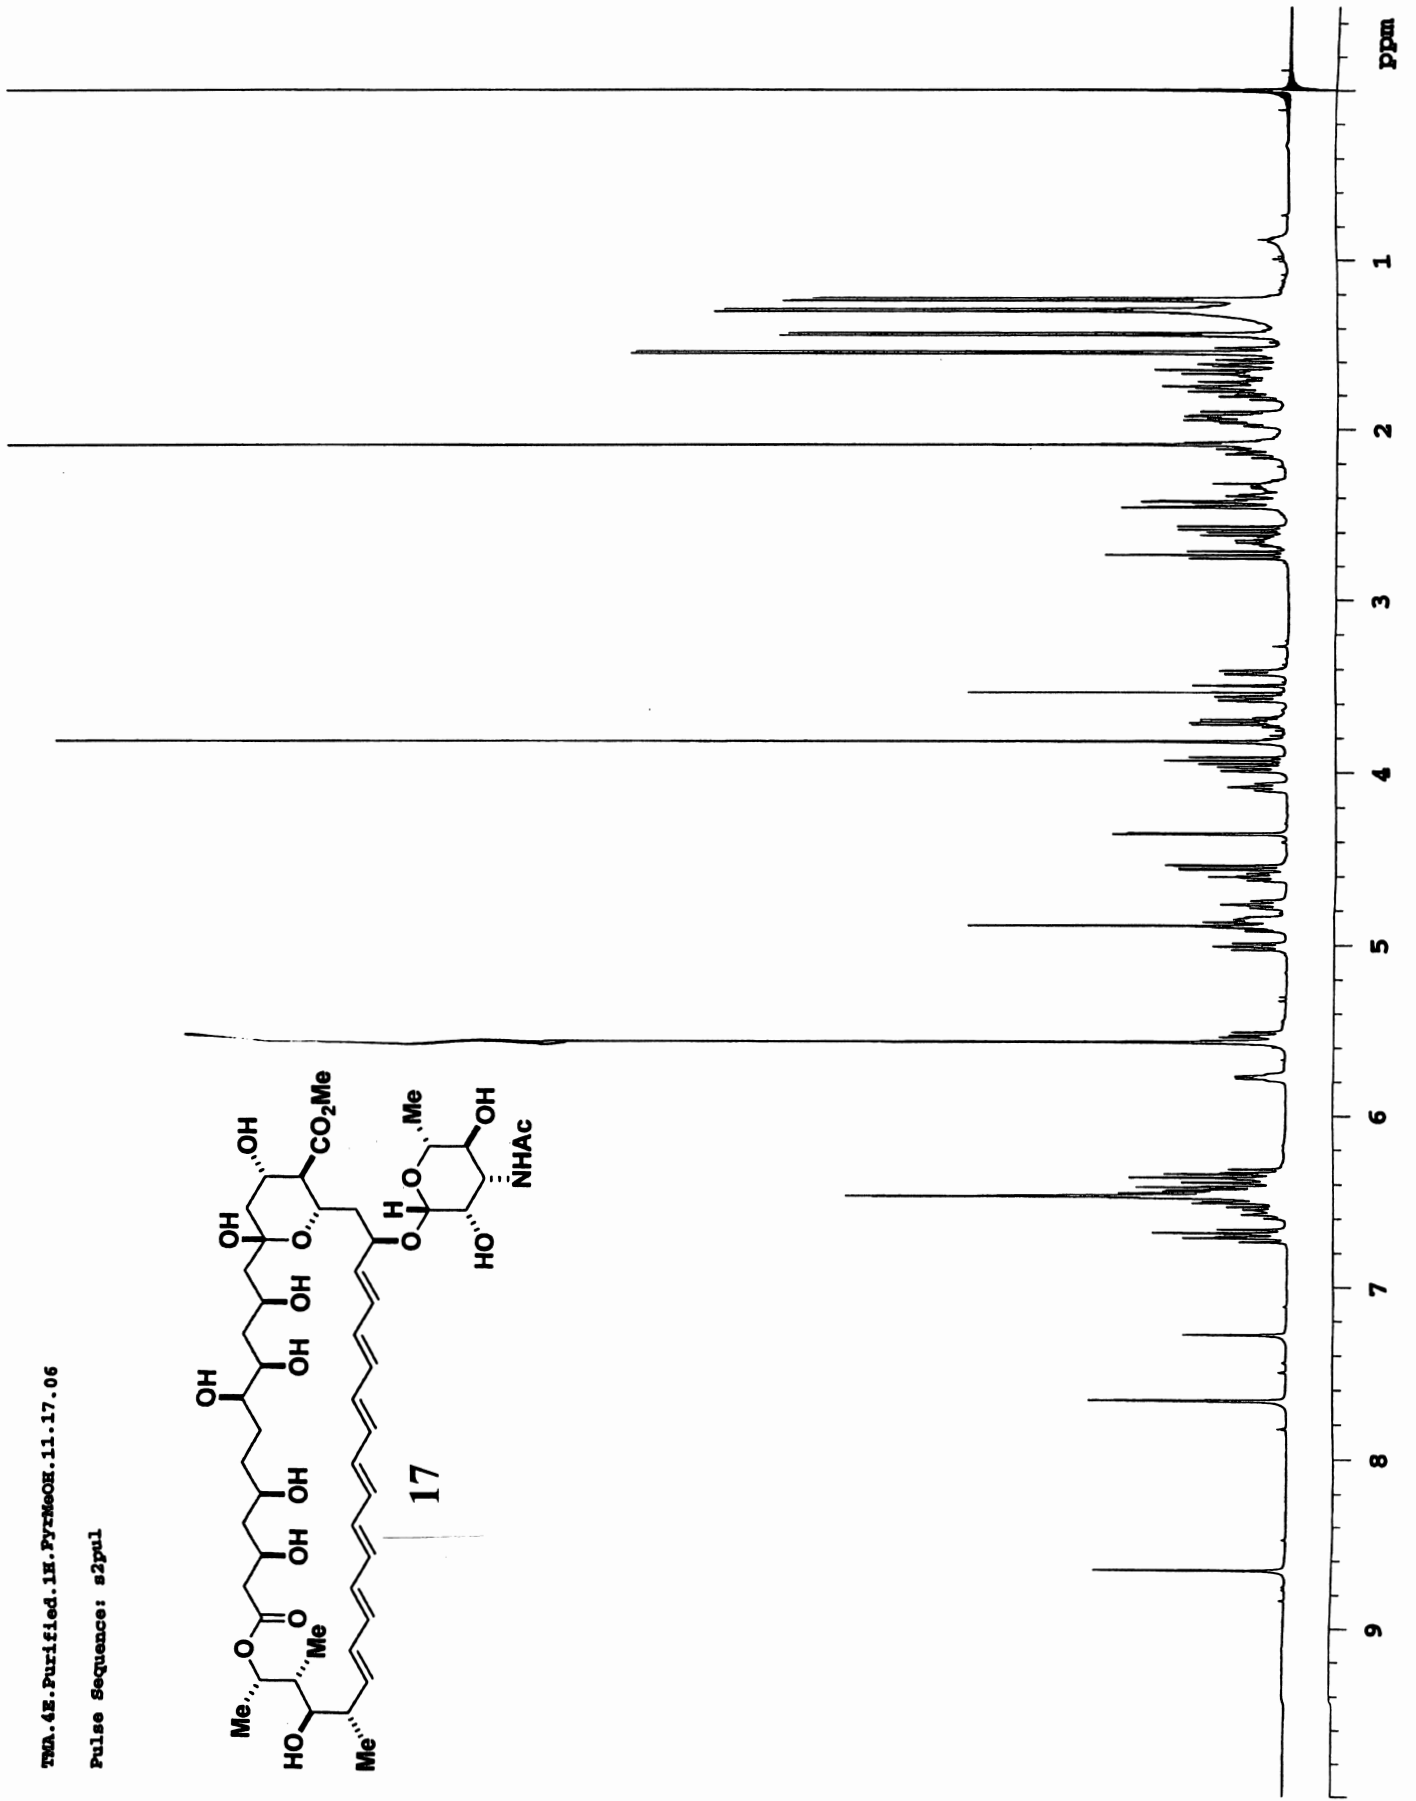

N-Acyl Methyl Ester 13C

Pulse Sequence: s2pul

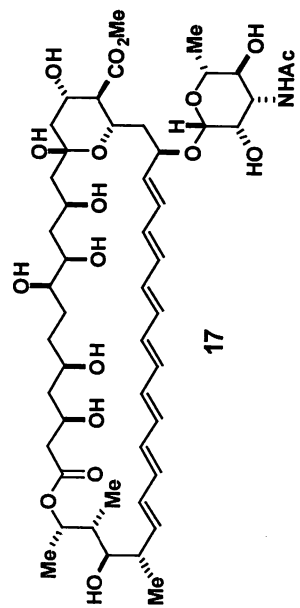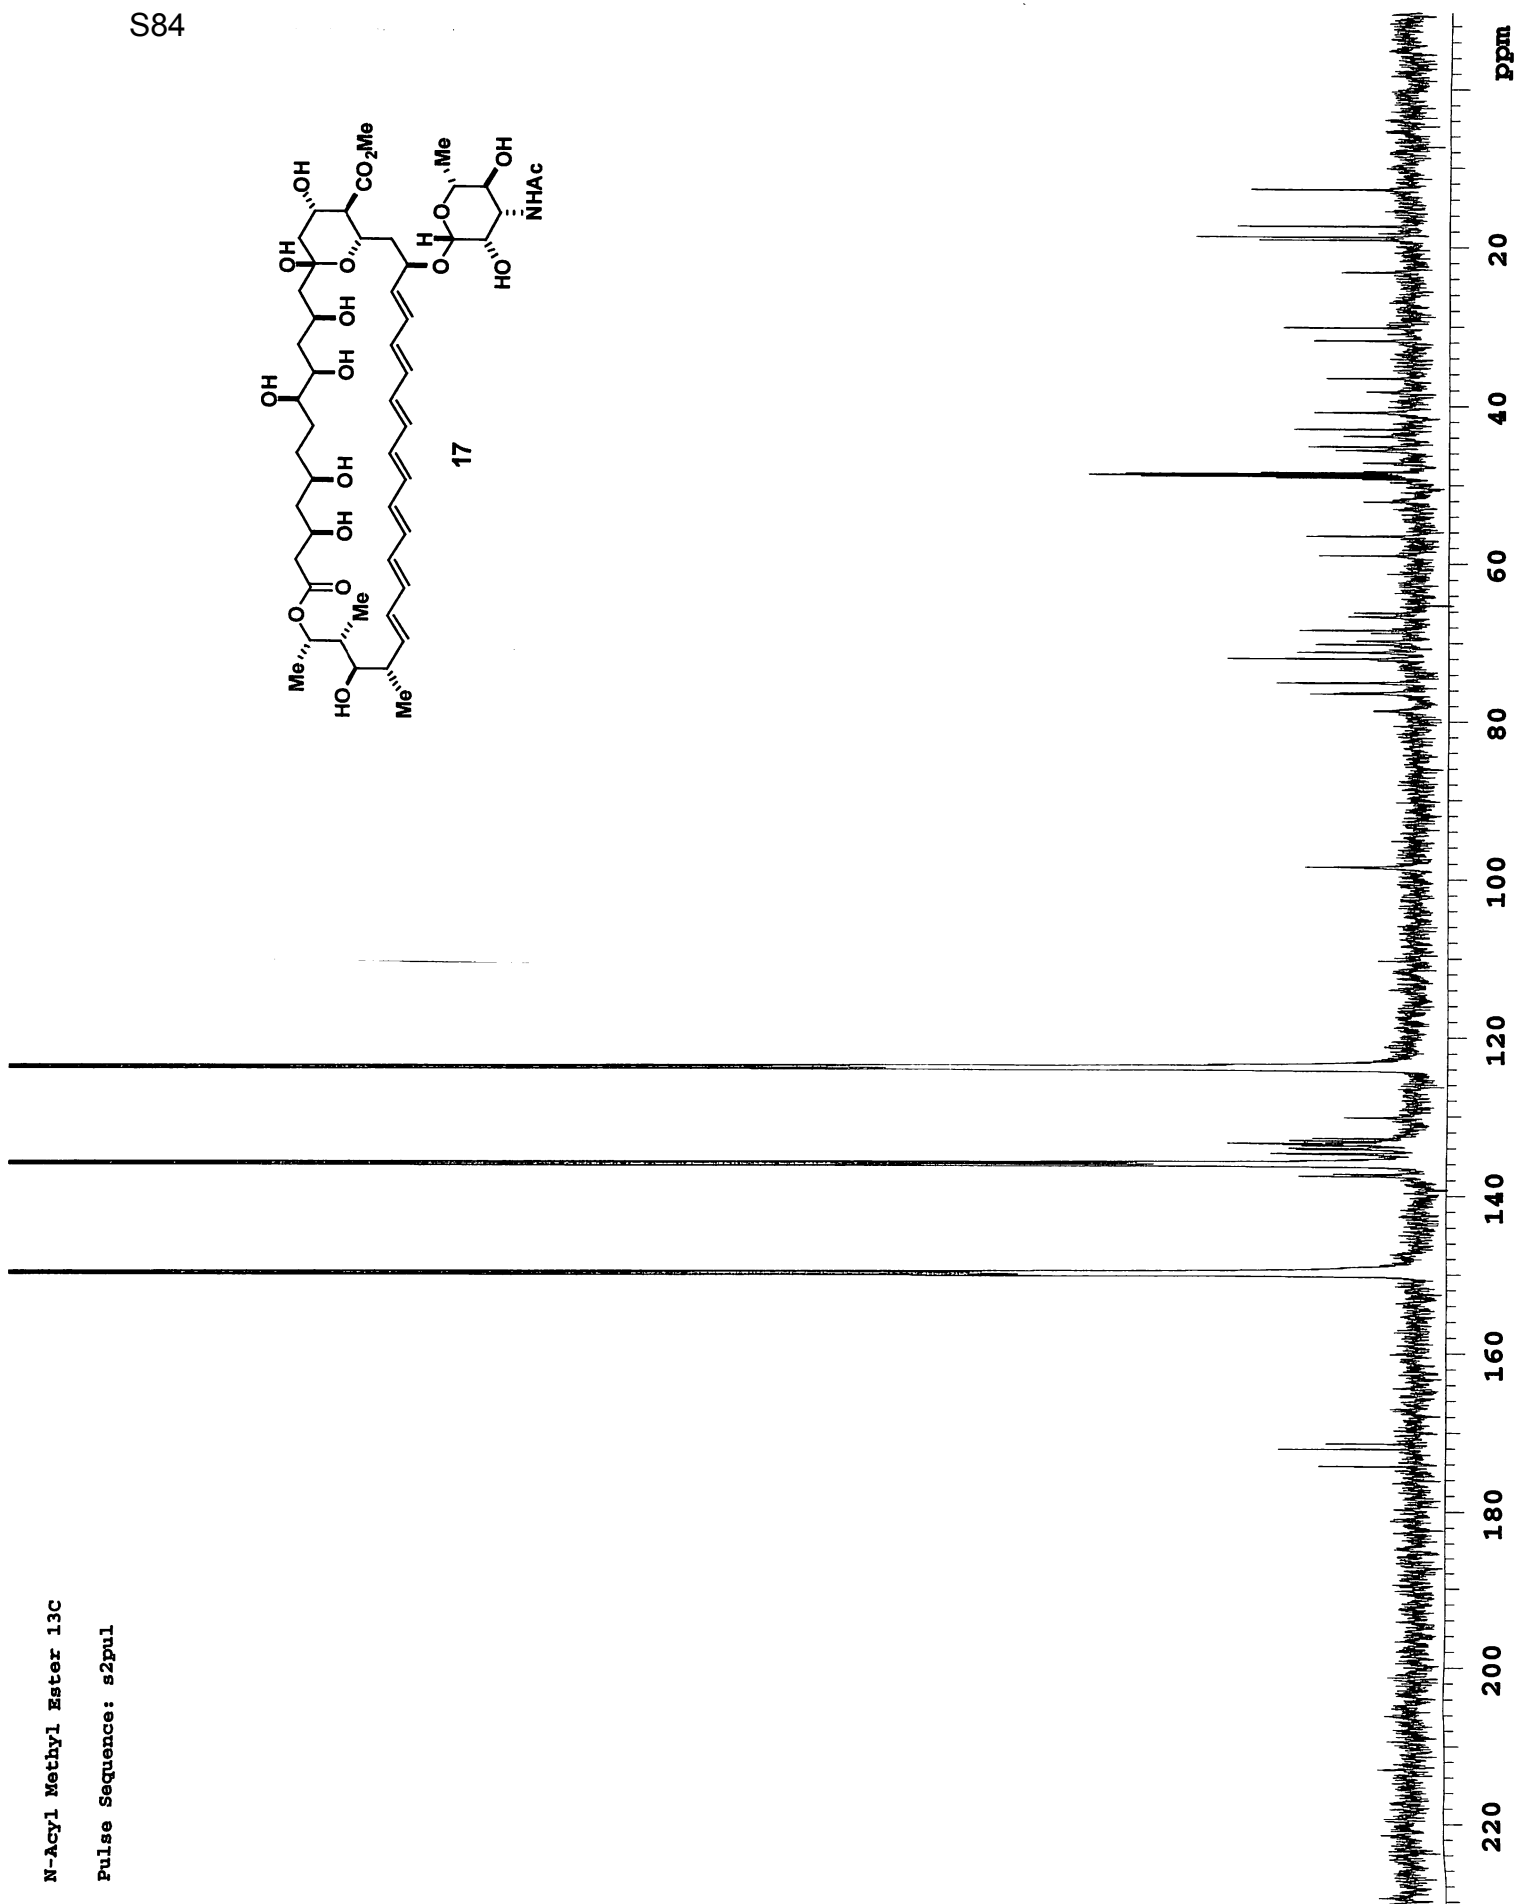

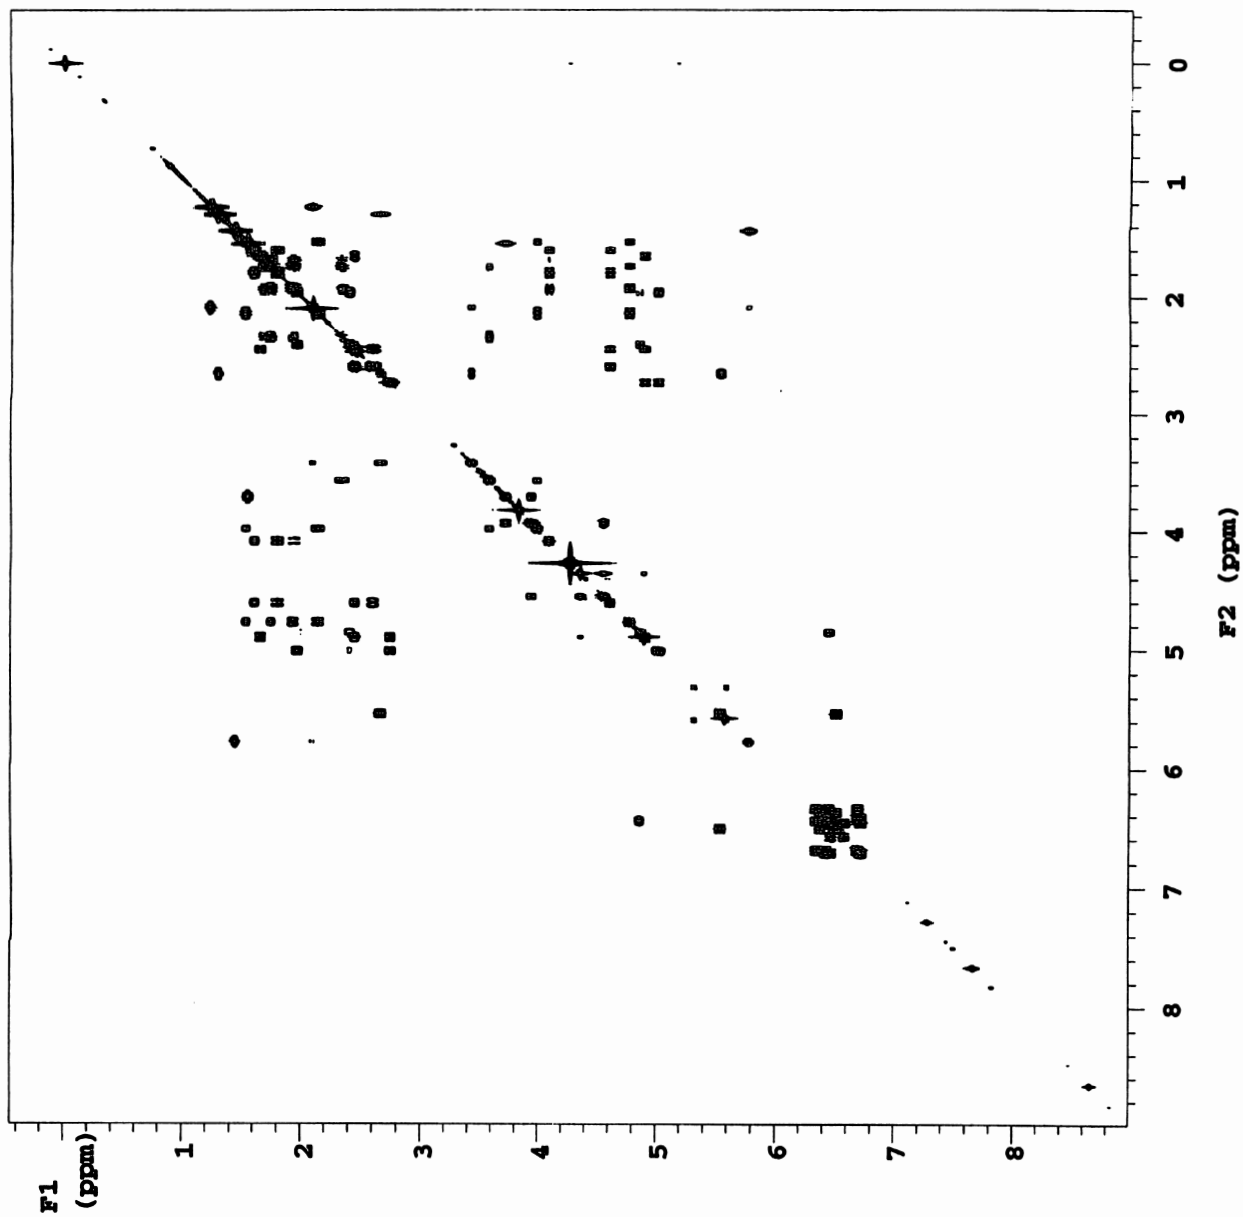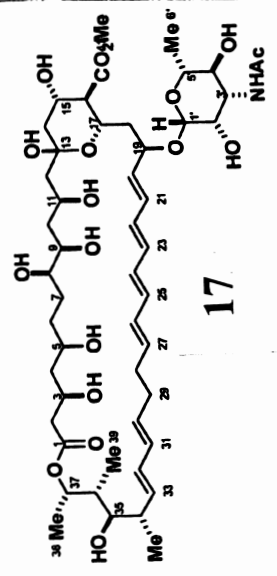



TMA-4E-EMSC-11.28.06

Pulse Sequence: gHMBC

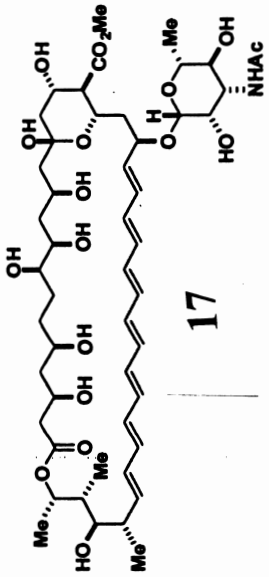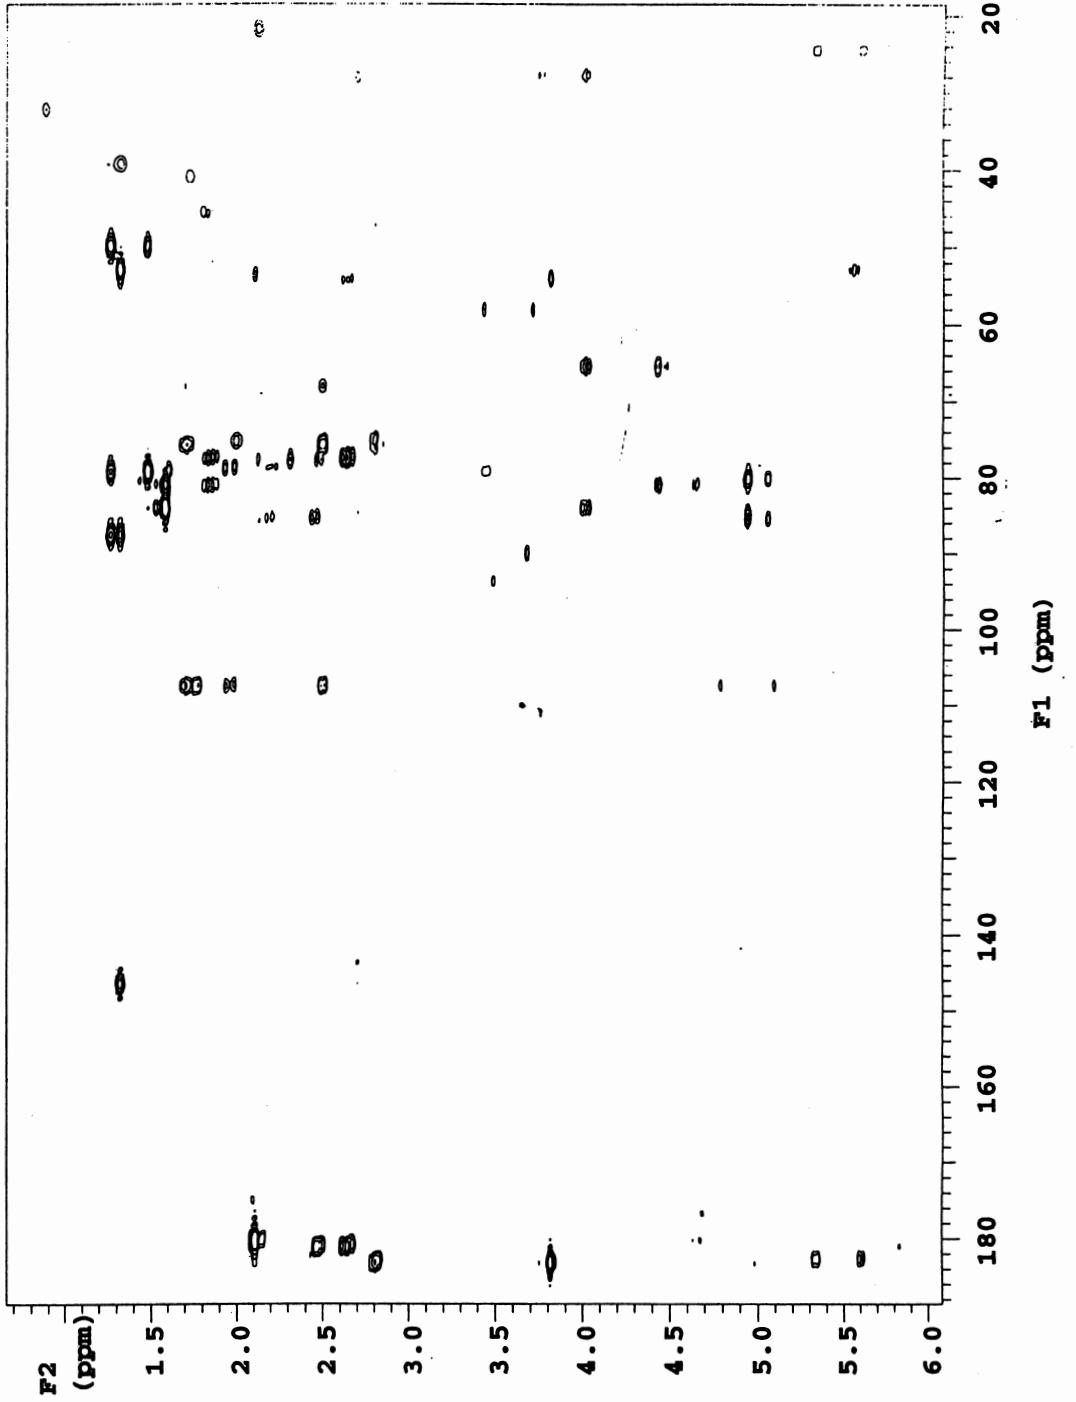

S87

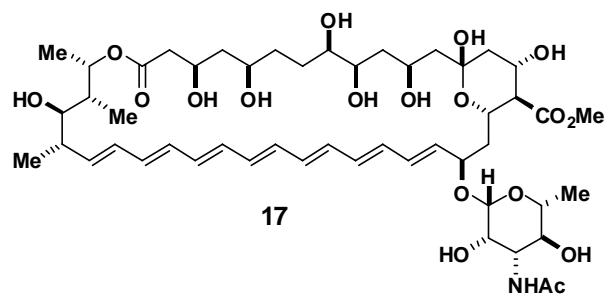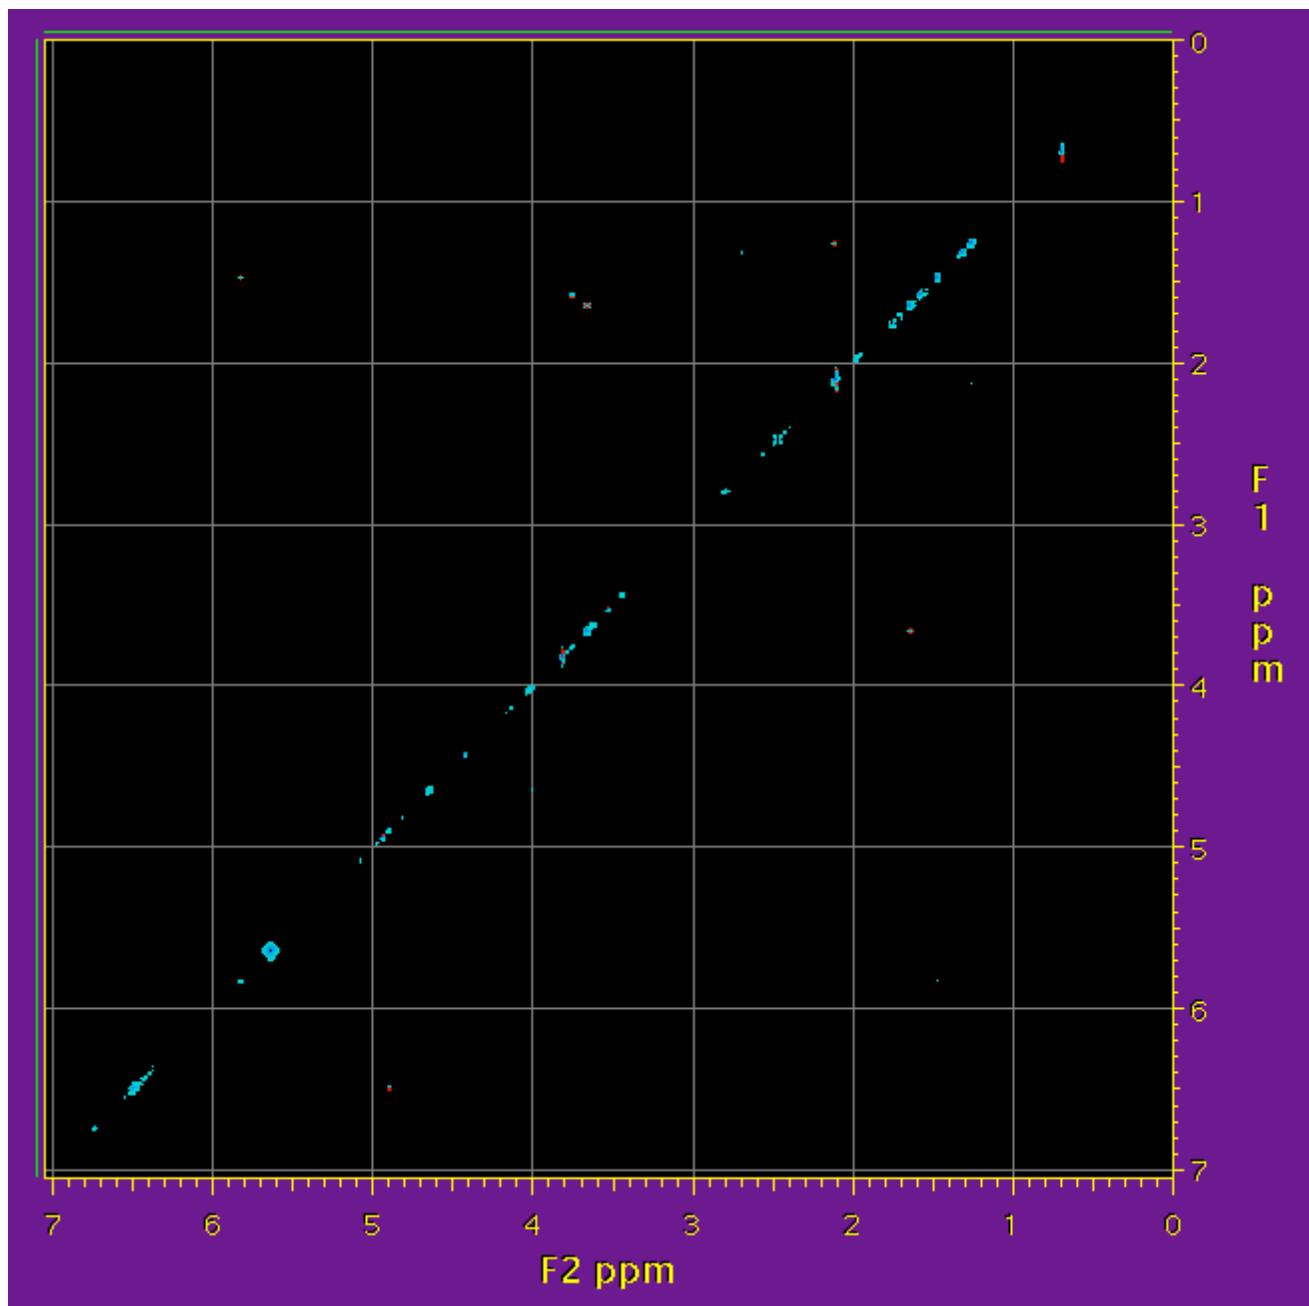

500 MHz diagonal COSYPS spectrum of 17

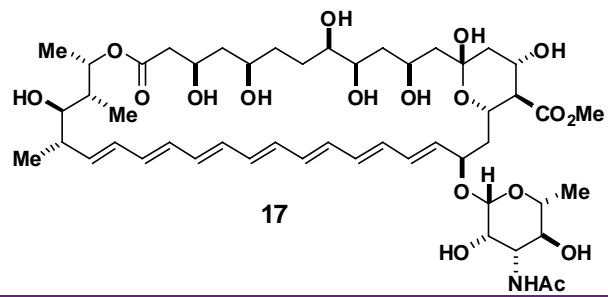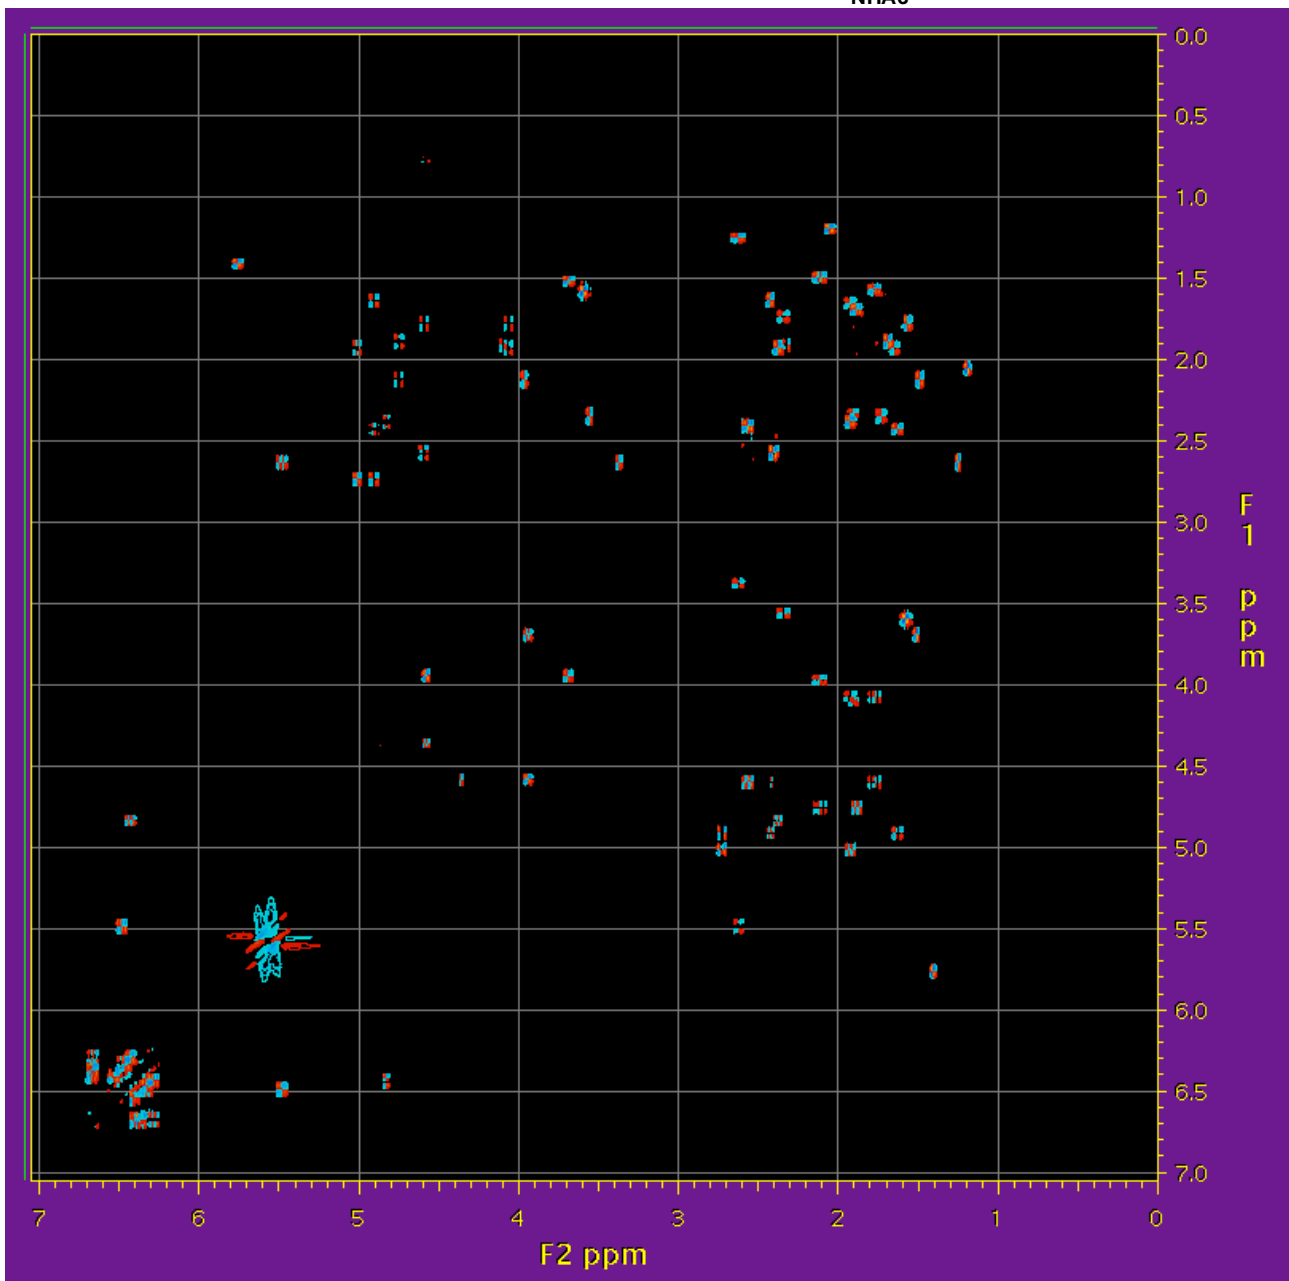

**500 MHz diagonal-suppressed COSYPS spectrum of 17**

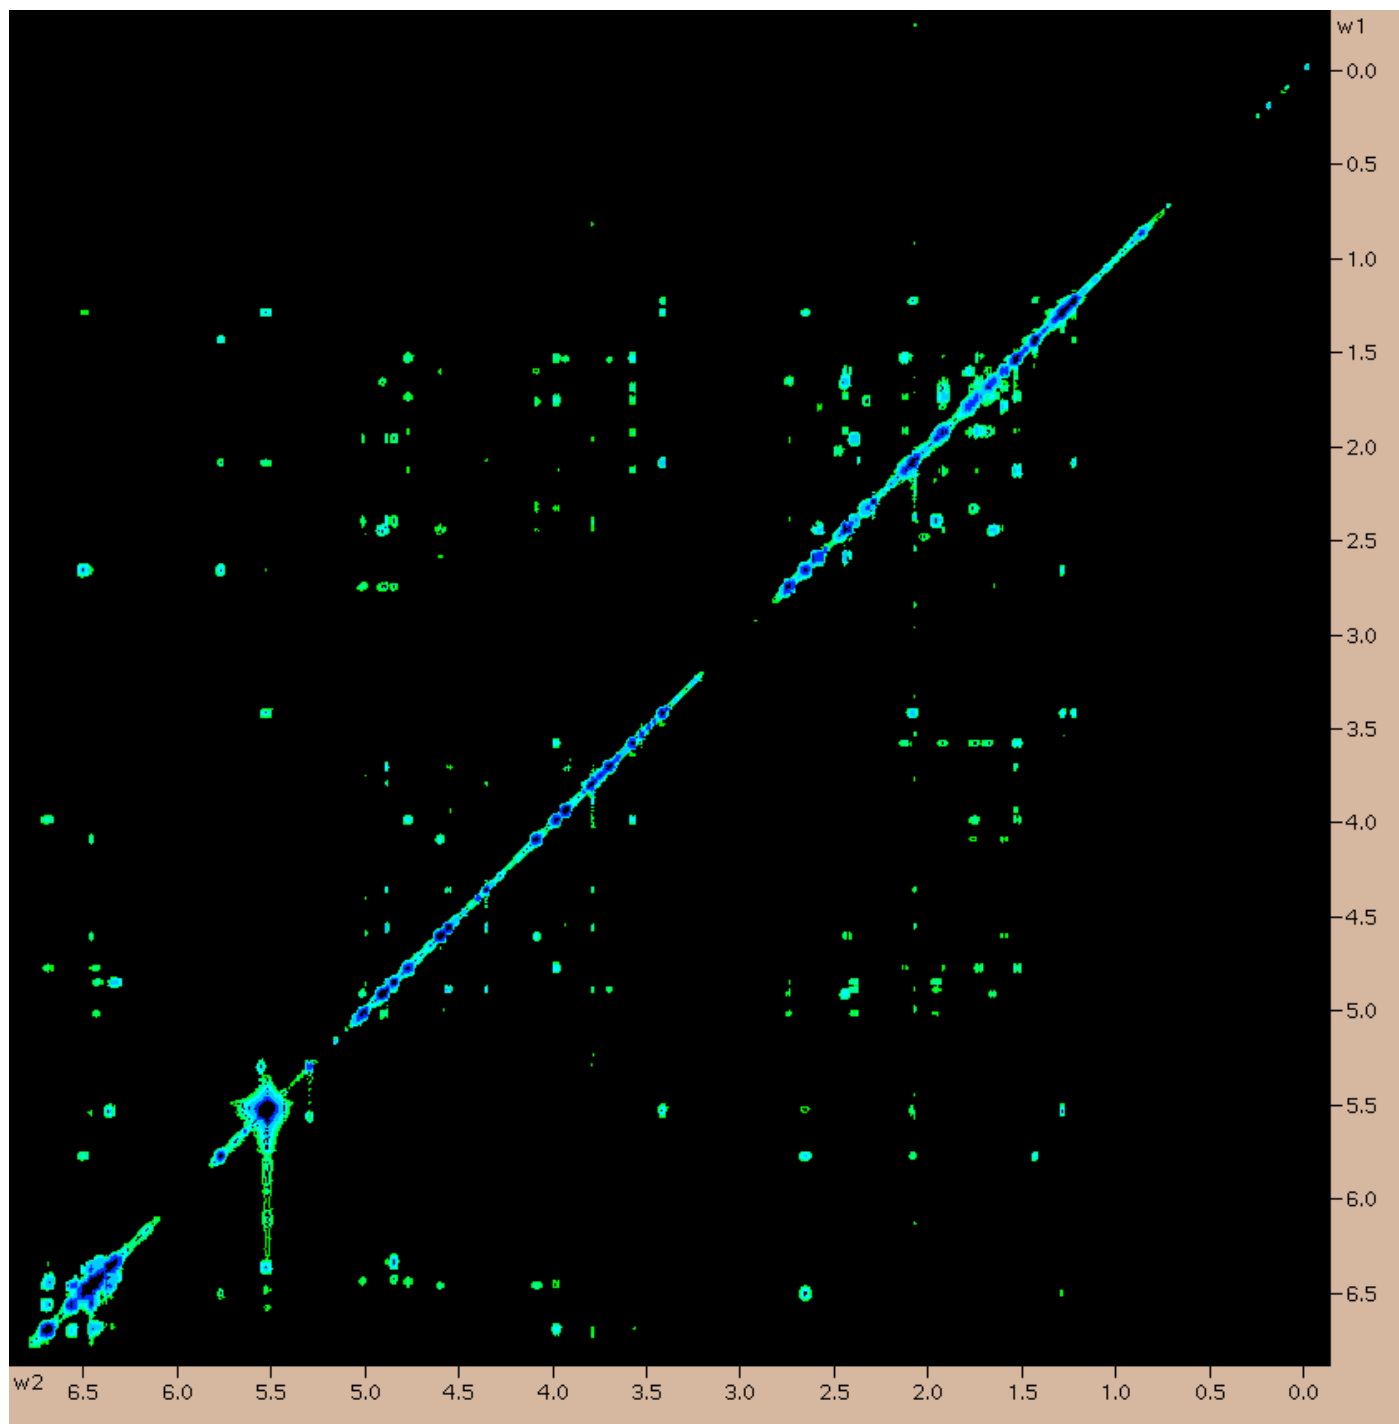

600 MHz NOESY spectrum of 17

## STANDARD PROTON PARAMETERS

Pulse Sequence: s2pul

Solvent: Acetone

Ambient temperature

INOVA-500 "ui500mb"

Pulse 90.0 degrees

Acq. time 4.096 sec

Width 8000.0 Hz

12 repetitions

OBSERVE H1, 500.0755708 MHz

DATA PROCESSING

Line broadening 0.3 Hz

FT size 65536

Total time 8 min, 45 sec

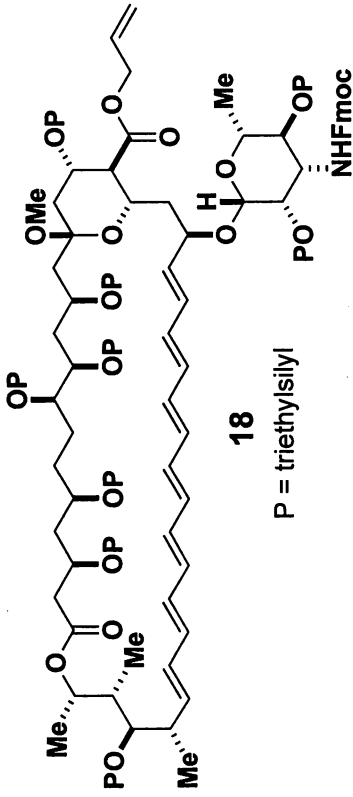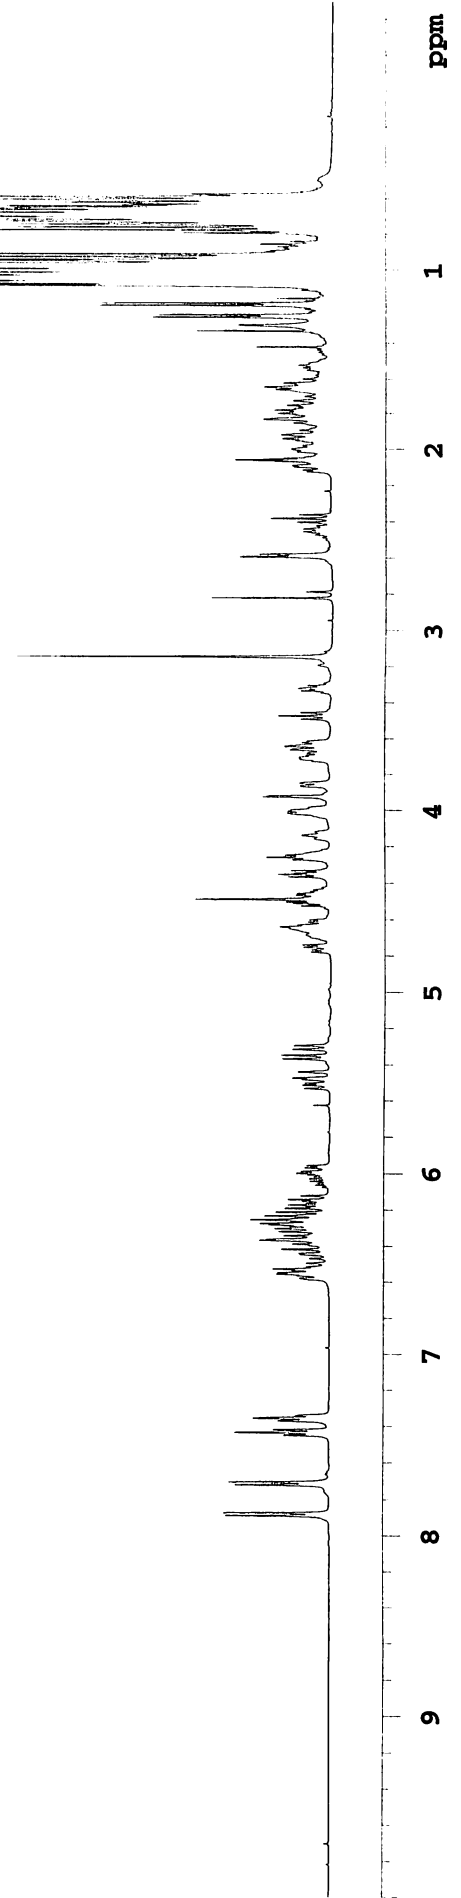

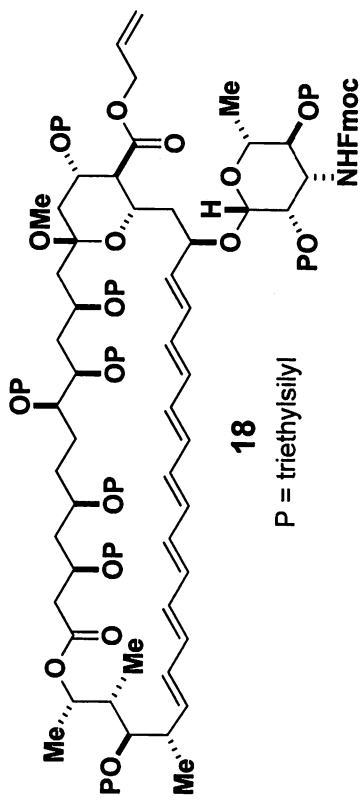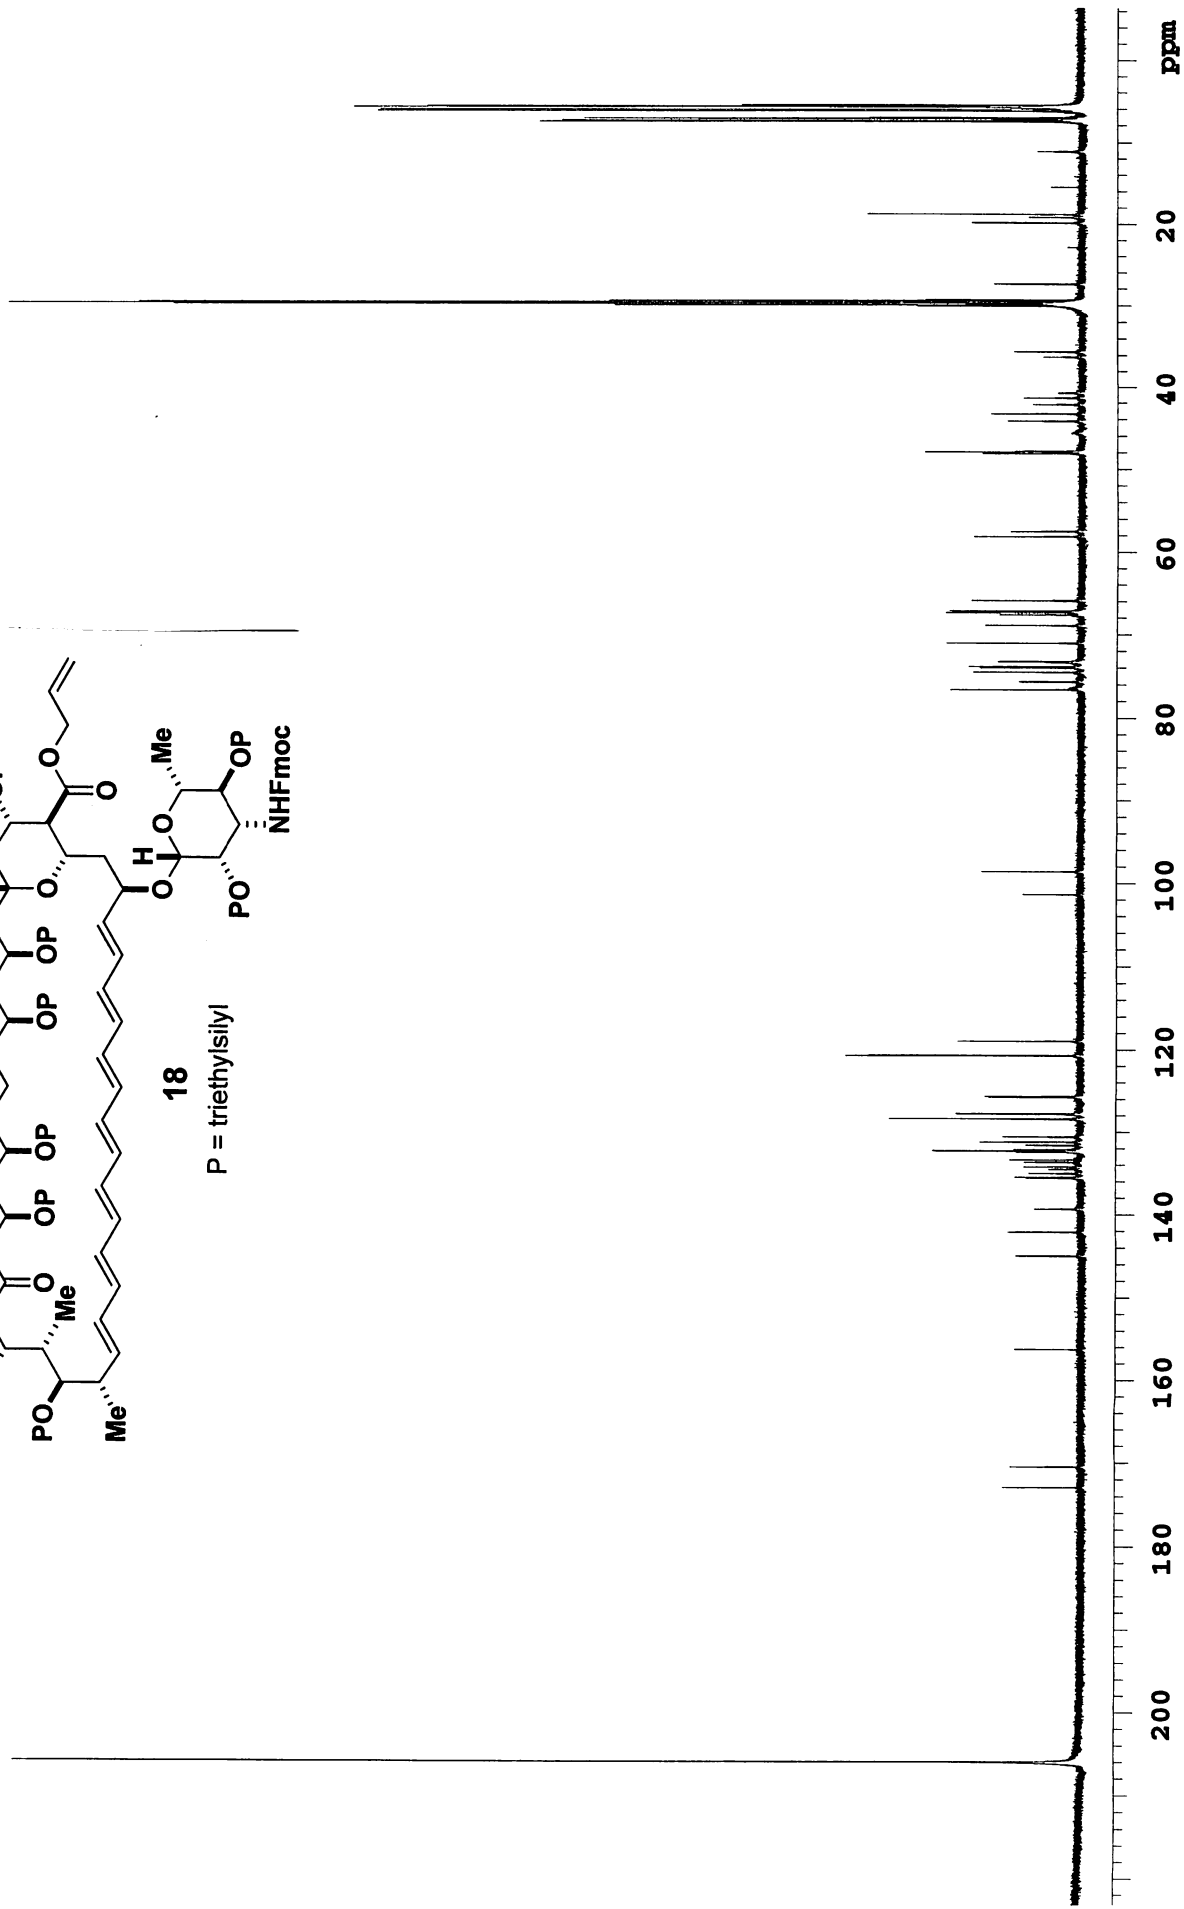

## STANDARD PROTON PARAMETERS

Pulse Sequence: s2pul

Solvent: Acetone

Ambient temperature

File: dsp.95a

INOVA-500 "ui500mb"

Pulse 90.0 degrees

Acq. time 4.096 sec

Width 8000.0 Hz

16 repetitions

OBSERVE H1, 500.0755708 MHz

DATA PROCESSING

Line broadening 0.3 Hz

FT size 65536

Total time 8 min, 45 sec

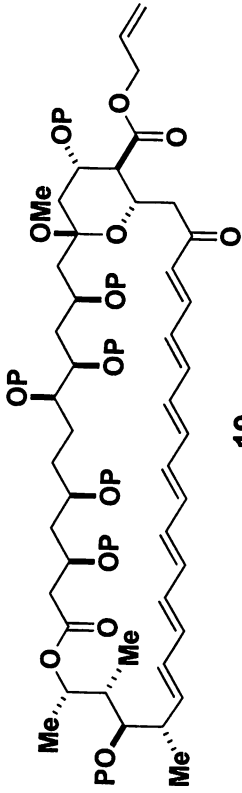

19

P = triethylsilyl

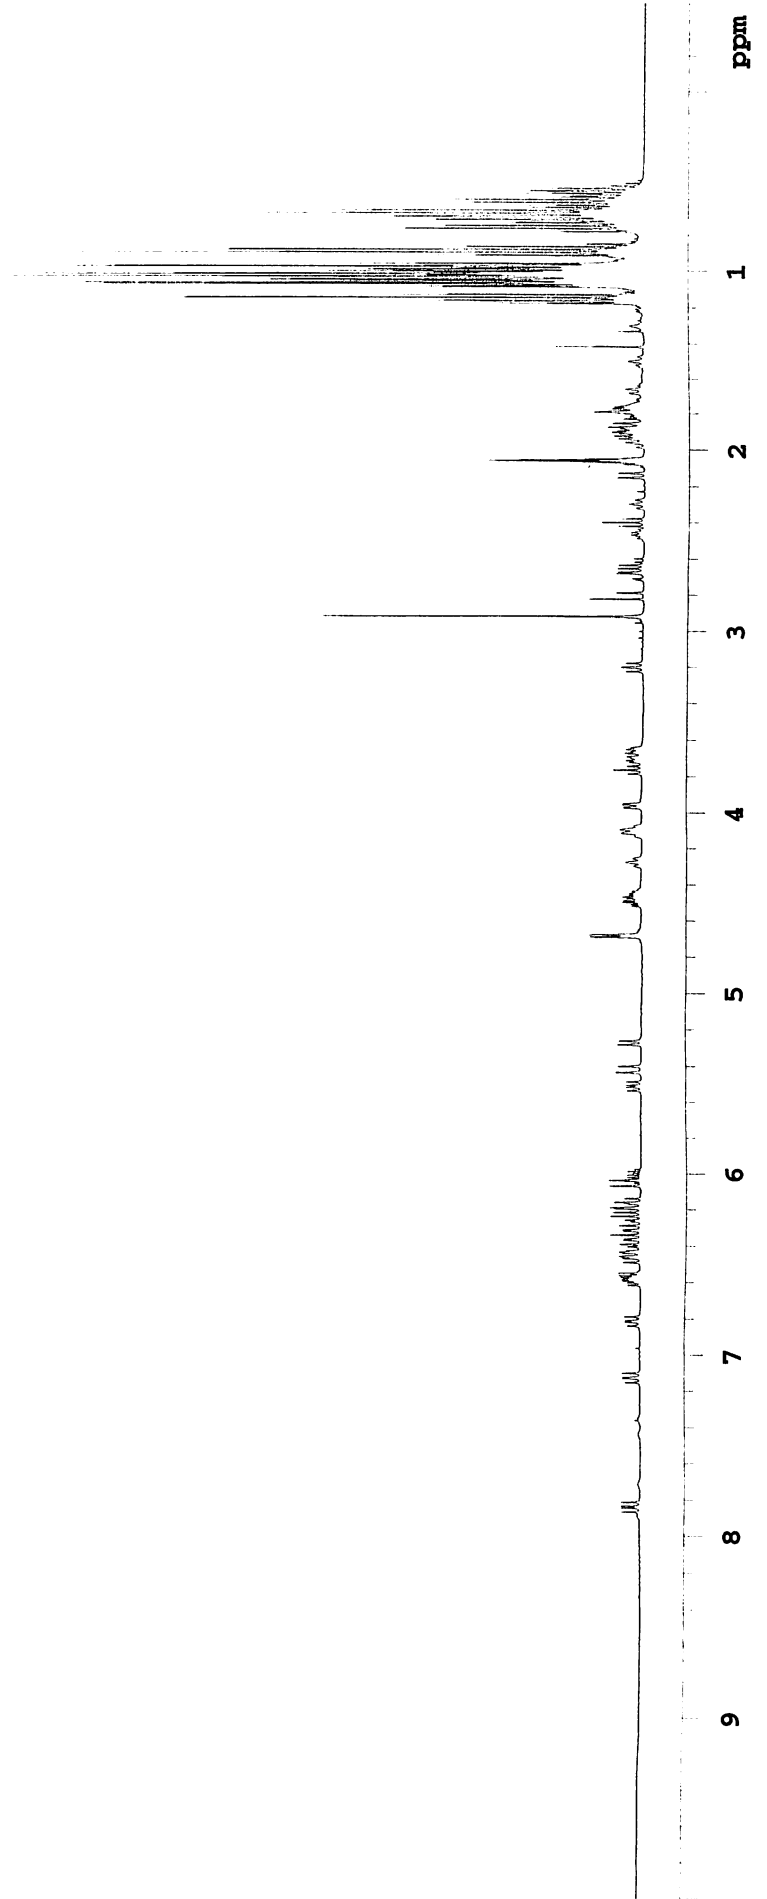

TMA.18.13C.Acetone.150.MHz

Pulse Sequence: s2pul

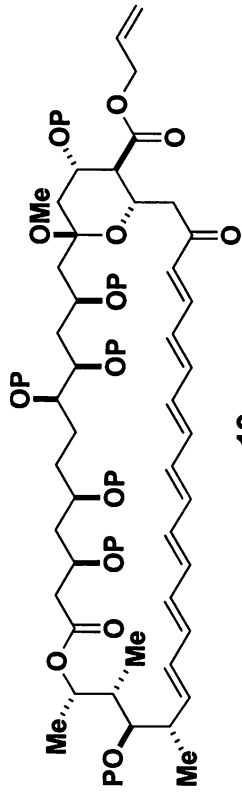

19

P = triethylsilyl

S93

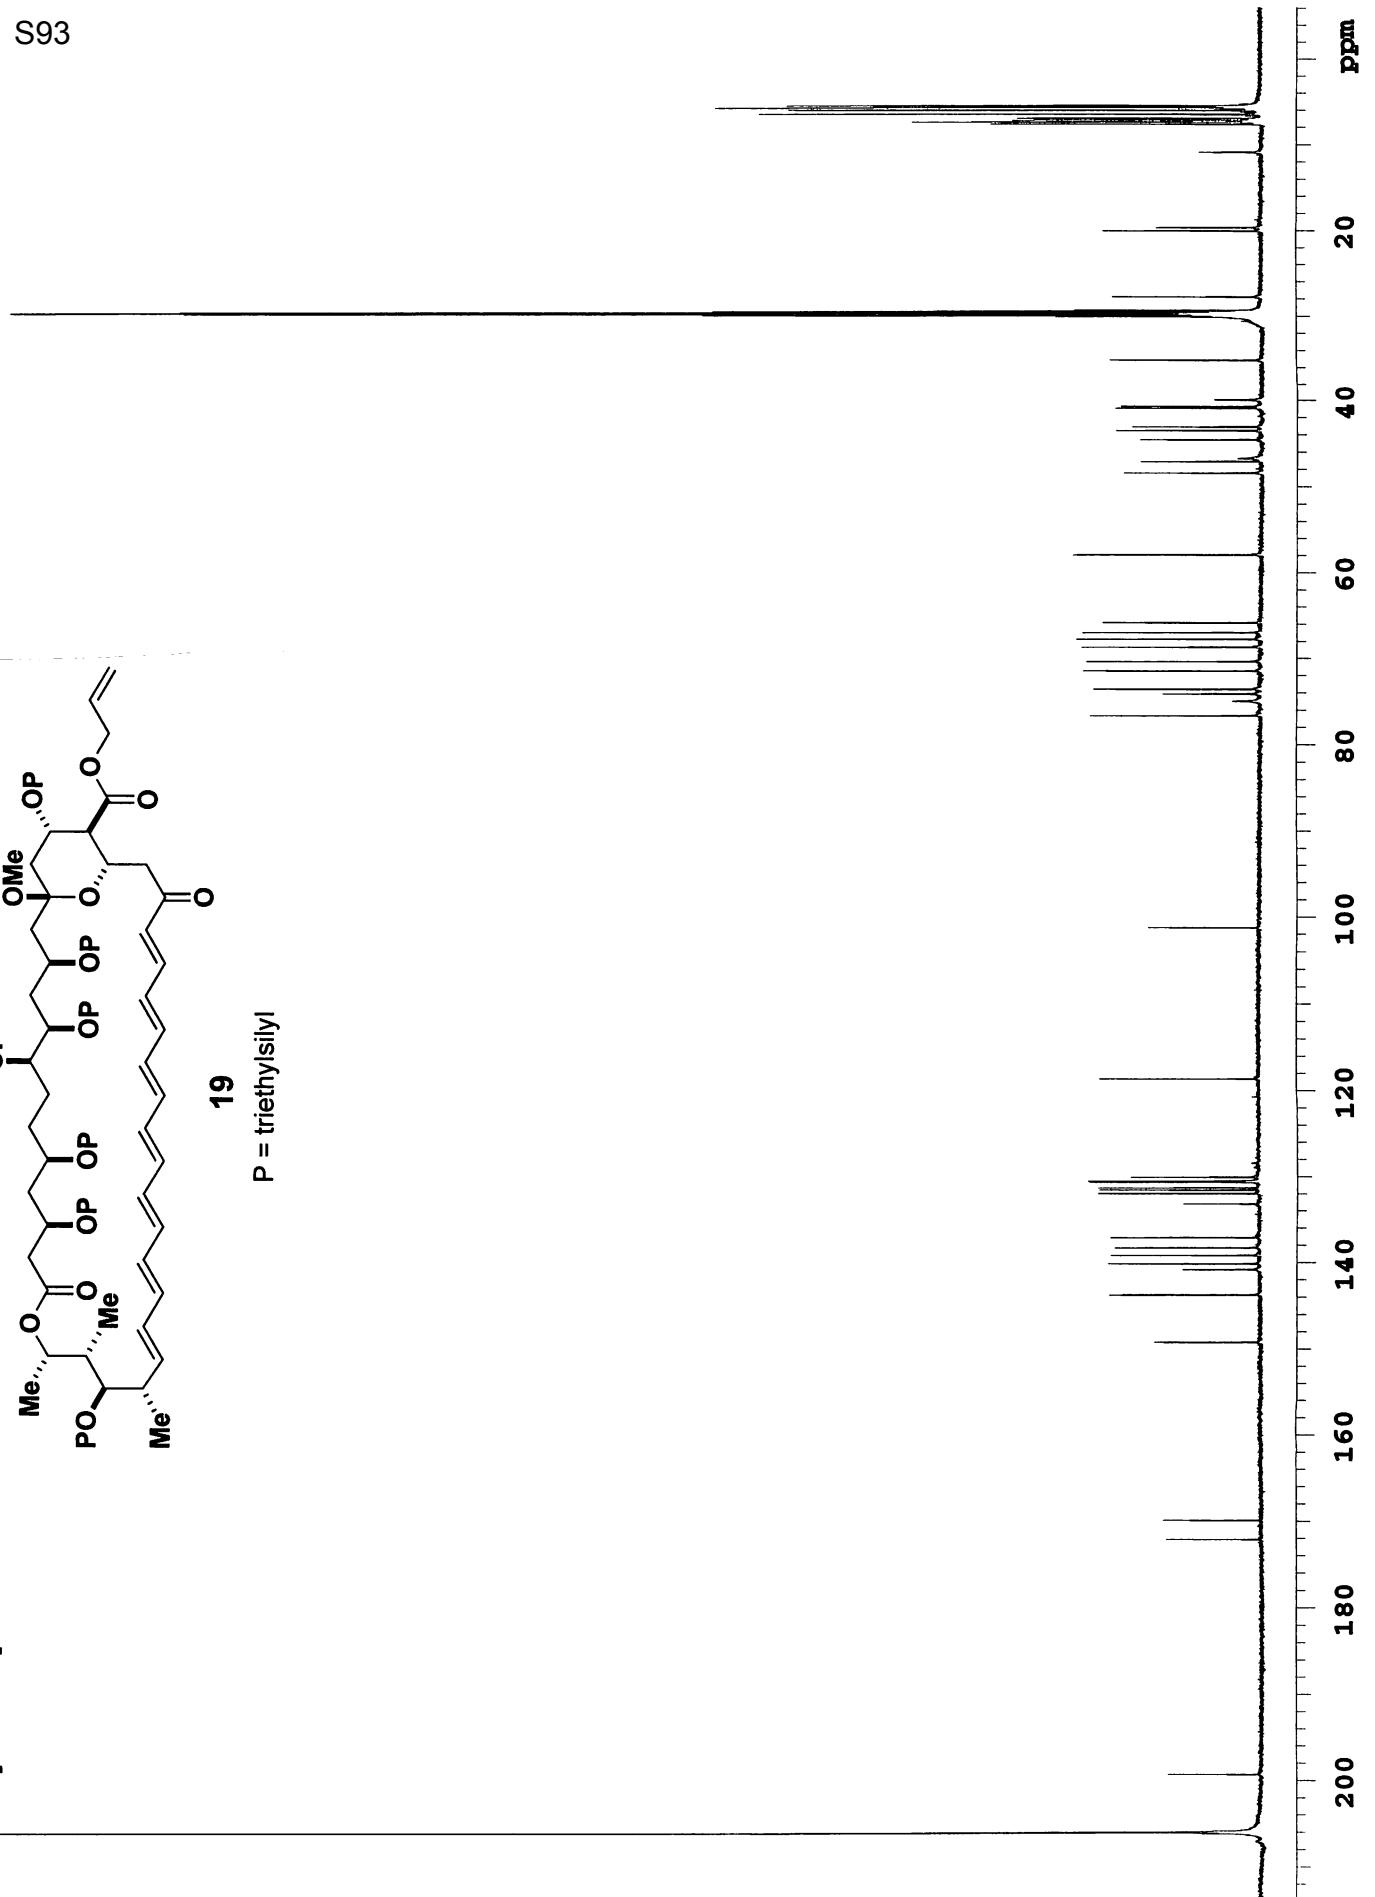



## STANDARD PROTON PARAMETERS

Pulse Sequence: s2pul

Solvent: CD3OD

Ambient temperature

File: dsp.97a.1h

INOVA-500 "ui500nb"

Pulse 90.0 degrees

Acq. time 4.096 sec

Width 8000.0 Hz

16 repetitions

OBSERVE H1, 500.0749488 MHz

DATA PROCESSING

Line broadening 0.3 Hz

FT size 262144

Total time 8 min, 45 sec

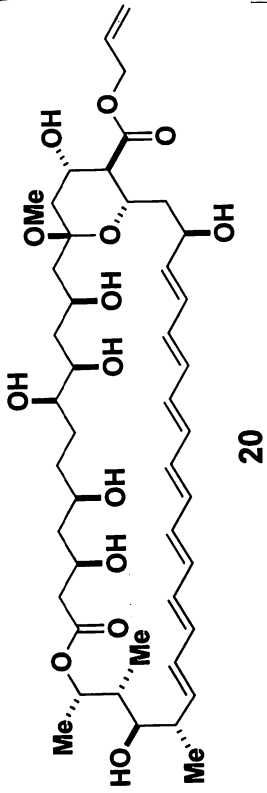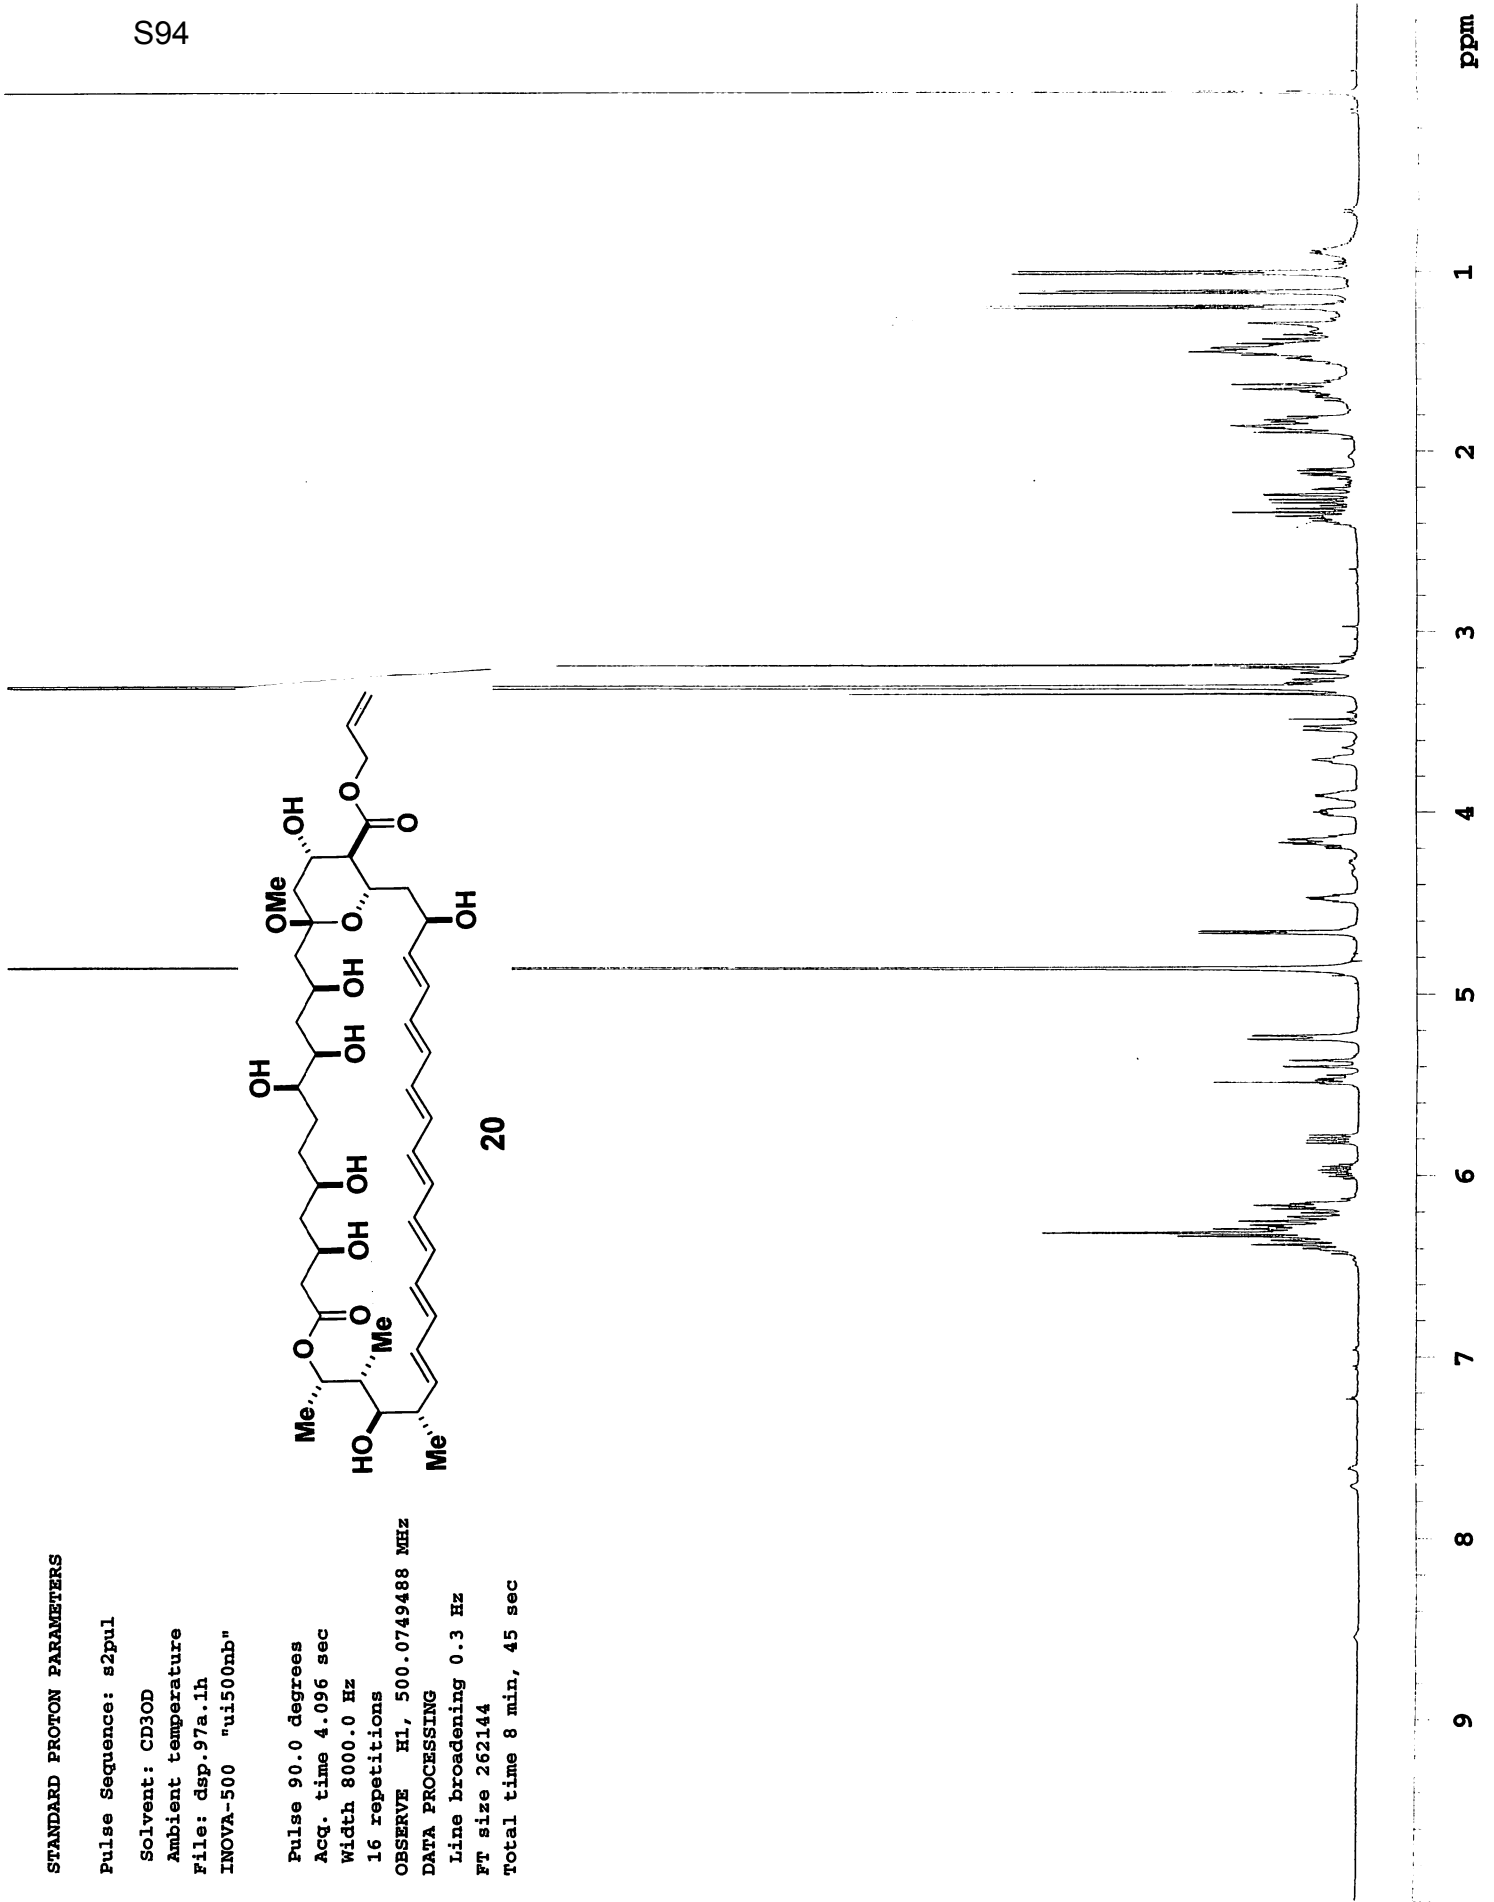

STANDARD CARBON PARAMETERS

```

exp1 s2pul
SAMPLE DEC. & VT
date Jan 5 2007 dfrq 499.431
solvent pyridine dn H1
file /export/home/~ dpwr 44
data/vxr500/Burke/~ dof -827.0
palacios/dsp.97a.1- dm yyy
3c.fid dmm w
ACQUISITION dmf 19000
sfrq 125.595 dseq
tn C13 dres 1.0
at 1.022 homo n
np 65536 DEC2
sw 32051.3 dfrq2 0
fb not used dn2
bs 16 dpwr2 1
tpwr 63 dof2 0
pw 4.0 dm2 n
d1 2.000 dmm2 c
tof 1880.0 dmf2 18519
nt 100000 dseq2
ct 13008 dres2 1.0
alock n homo2 n
gain not used PROCESSING
FLAGS lb 1.00
il n wtfile
in n proc ft
dp y fn 262144
hs nn math f
DISPLAY
sp -2213.6 werr
wp 32051.0 wexp
vs 1305 wbs
sc 0 wnt
wc 250
hzmm 20.36
is 500.00
rfl 2213.9
rfp 0
th 30
ins 100.000
nm ph
  
```

S95

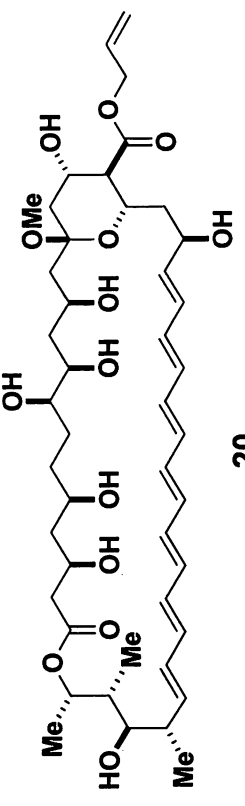

20

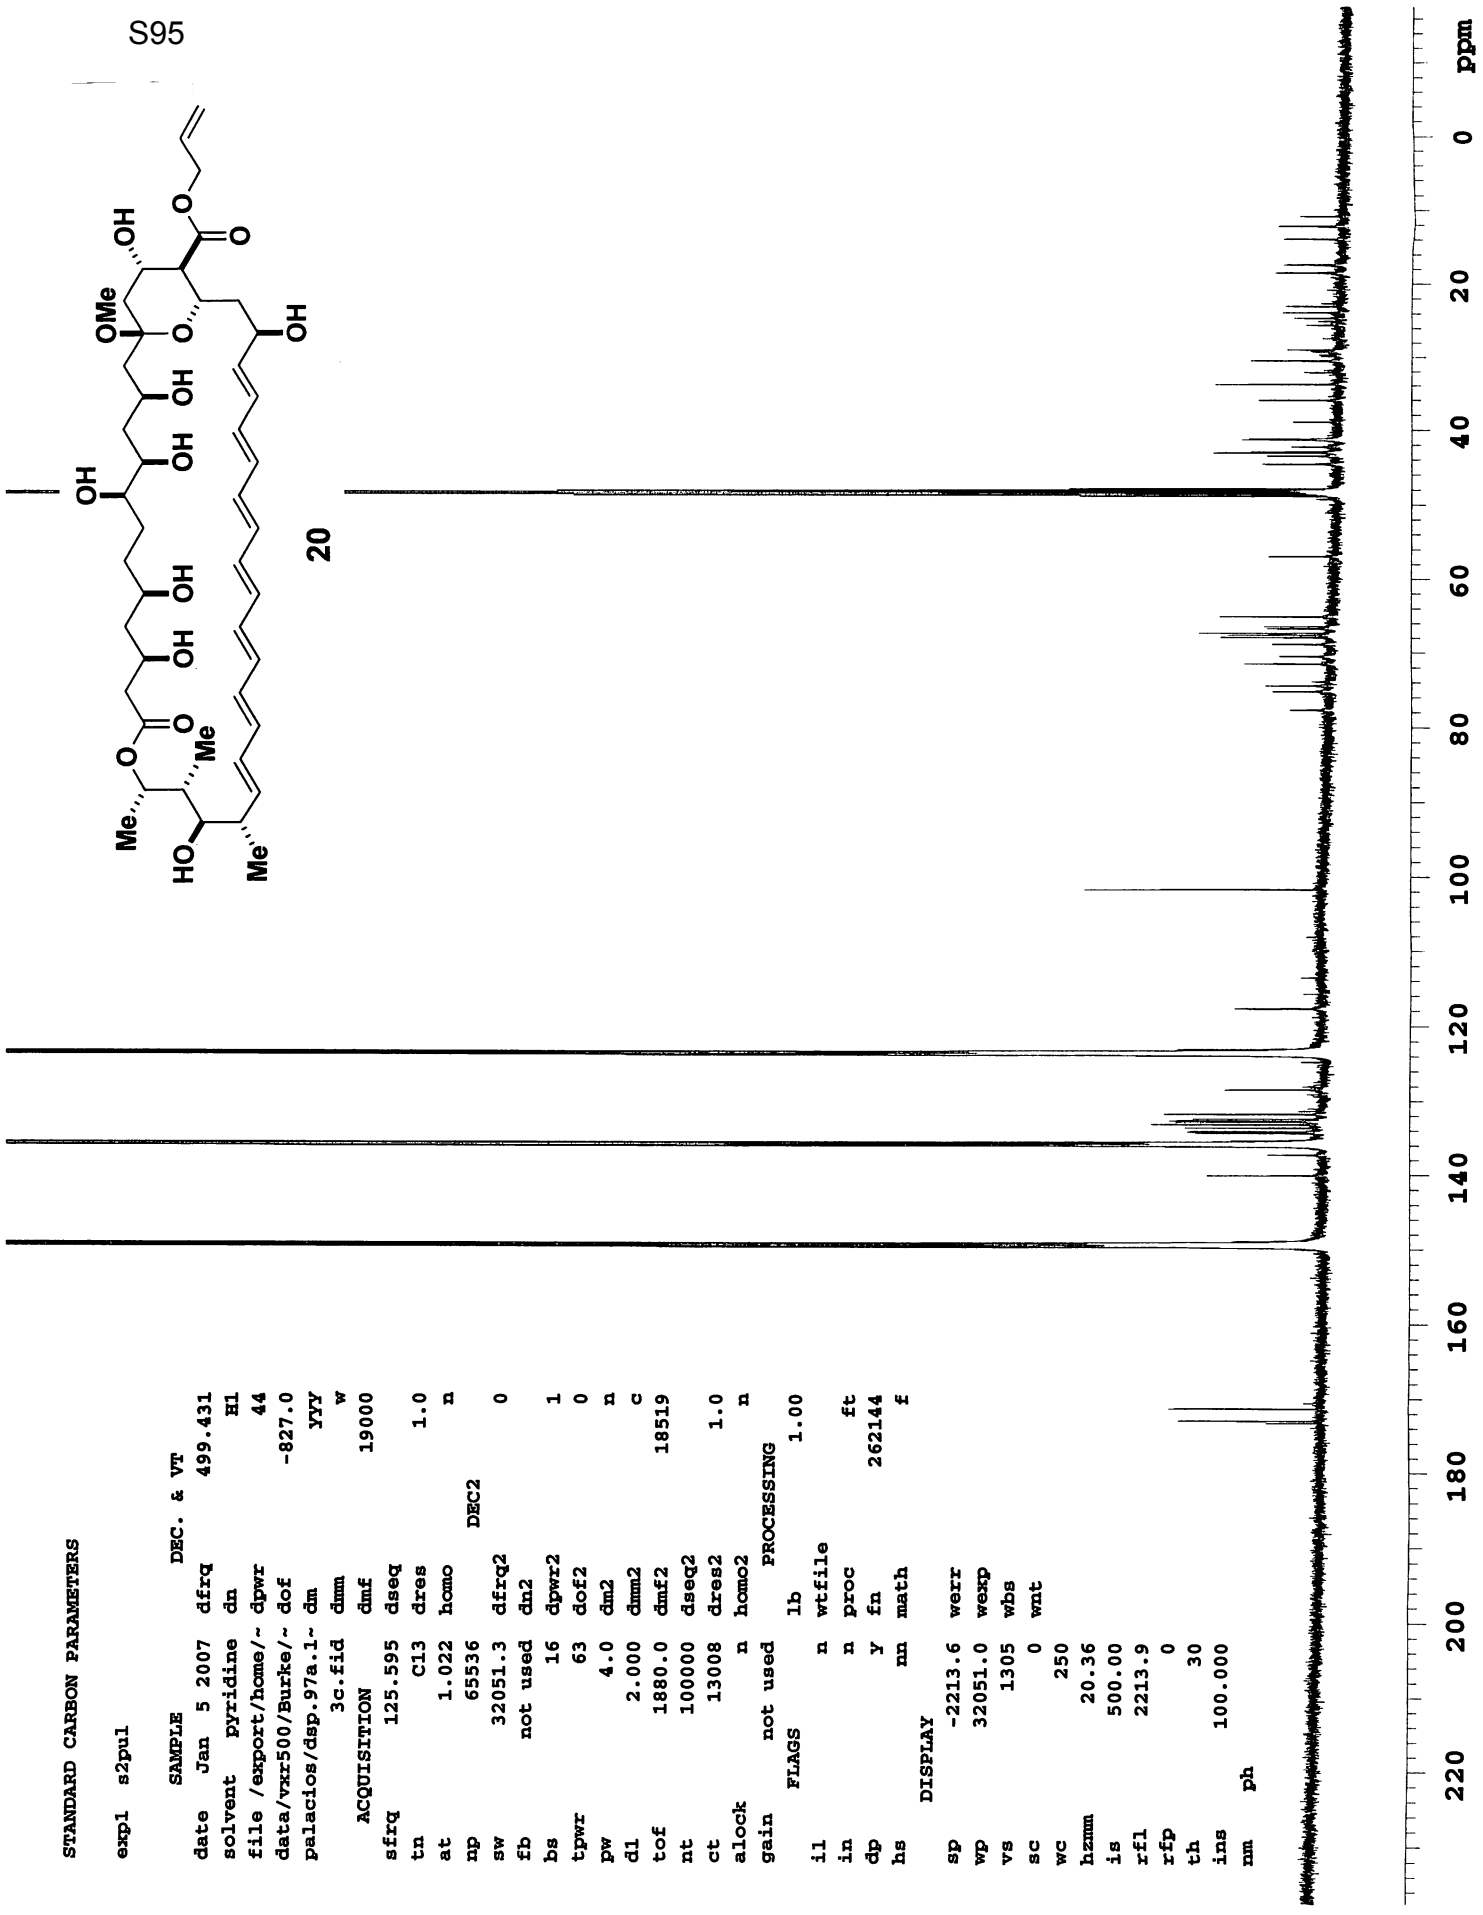

Amphoteronolide.B.Allyl.Ester.600.MHz

Pulse Sequence: s2pul

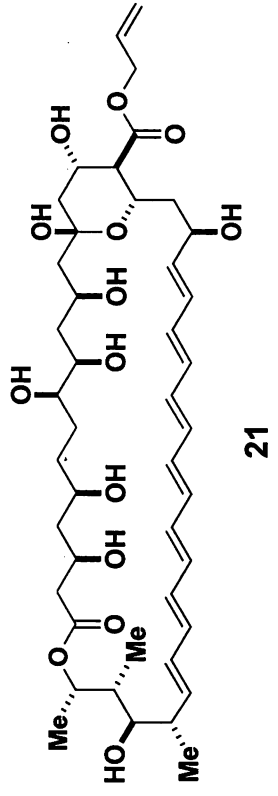

S96

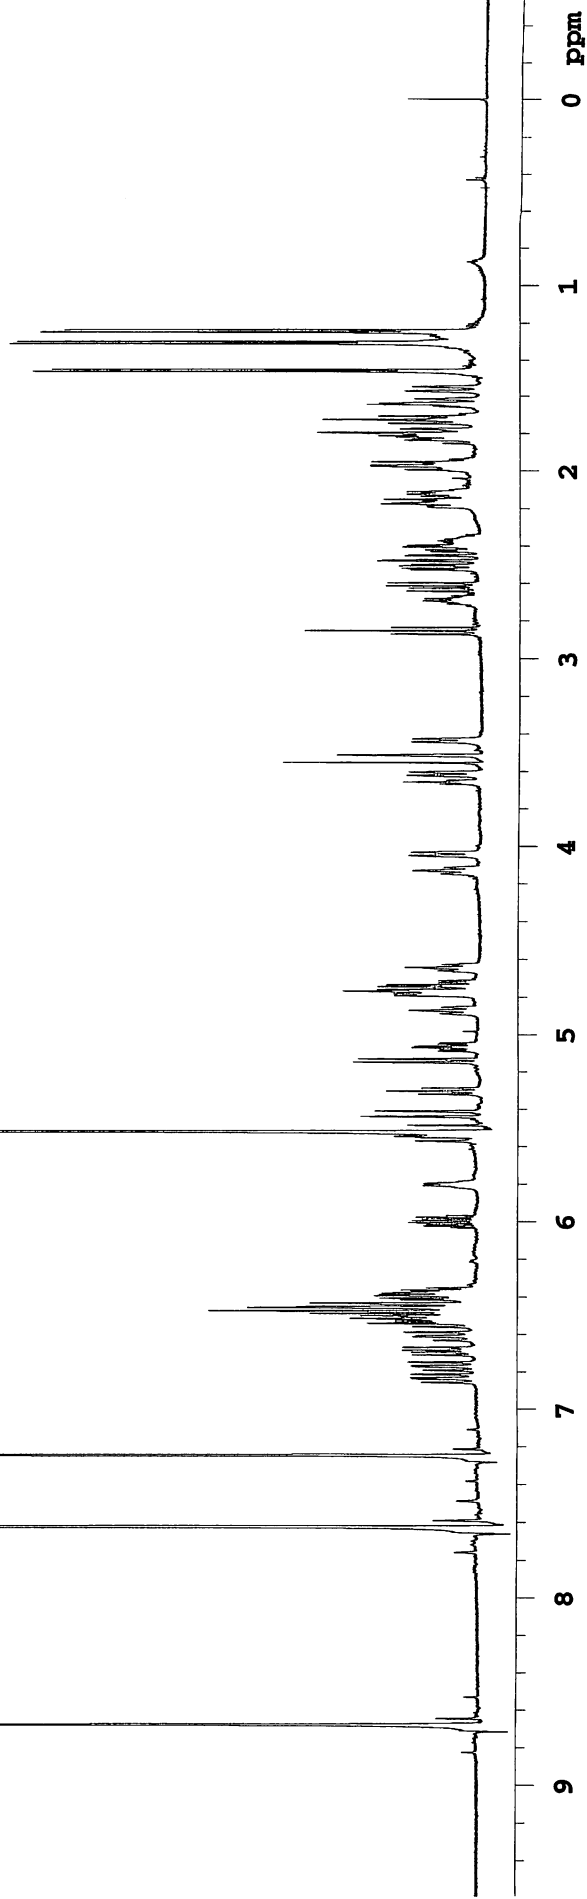

0 ppm  
1  
2  
3  
4  
5  
6  
7  
8  
9

S97

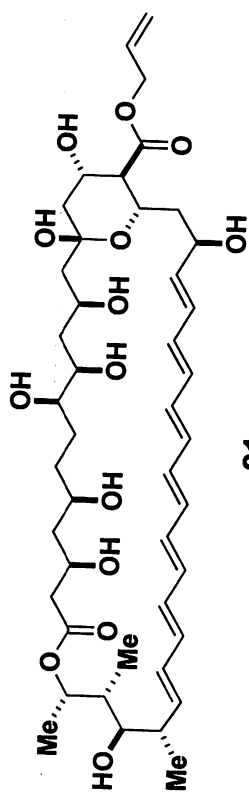

21

AmdeB.Allyl.Ester.I3C.150.MHz

Pulse Sequence: s2pul

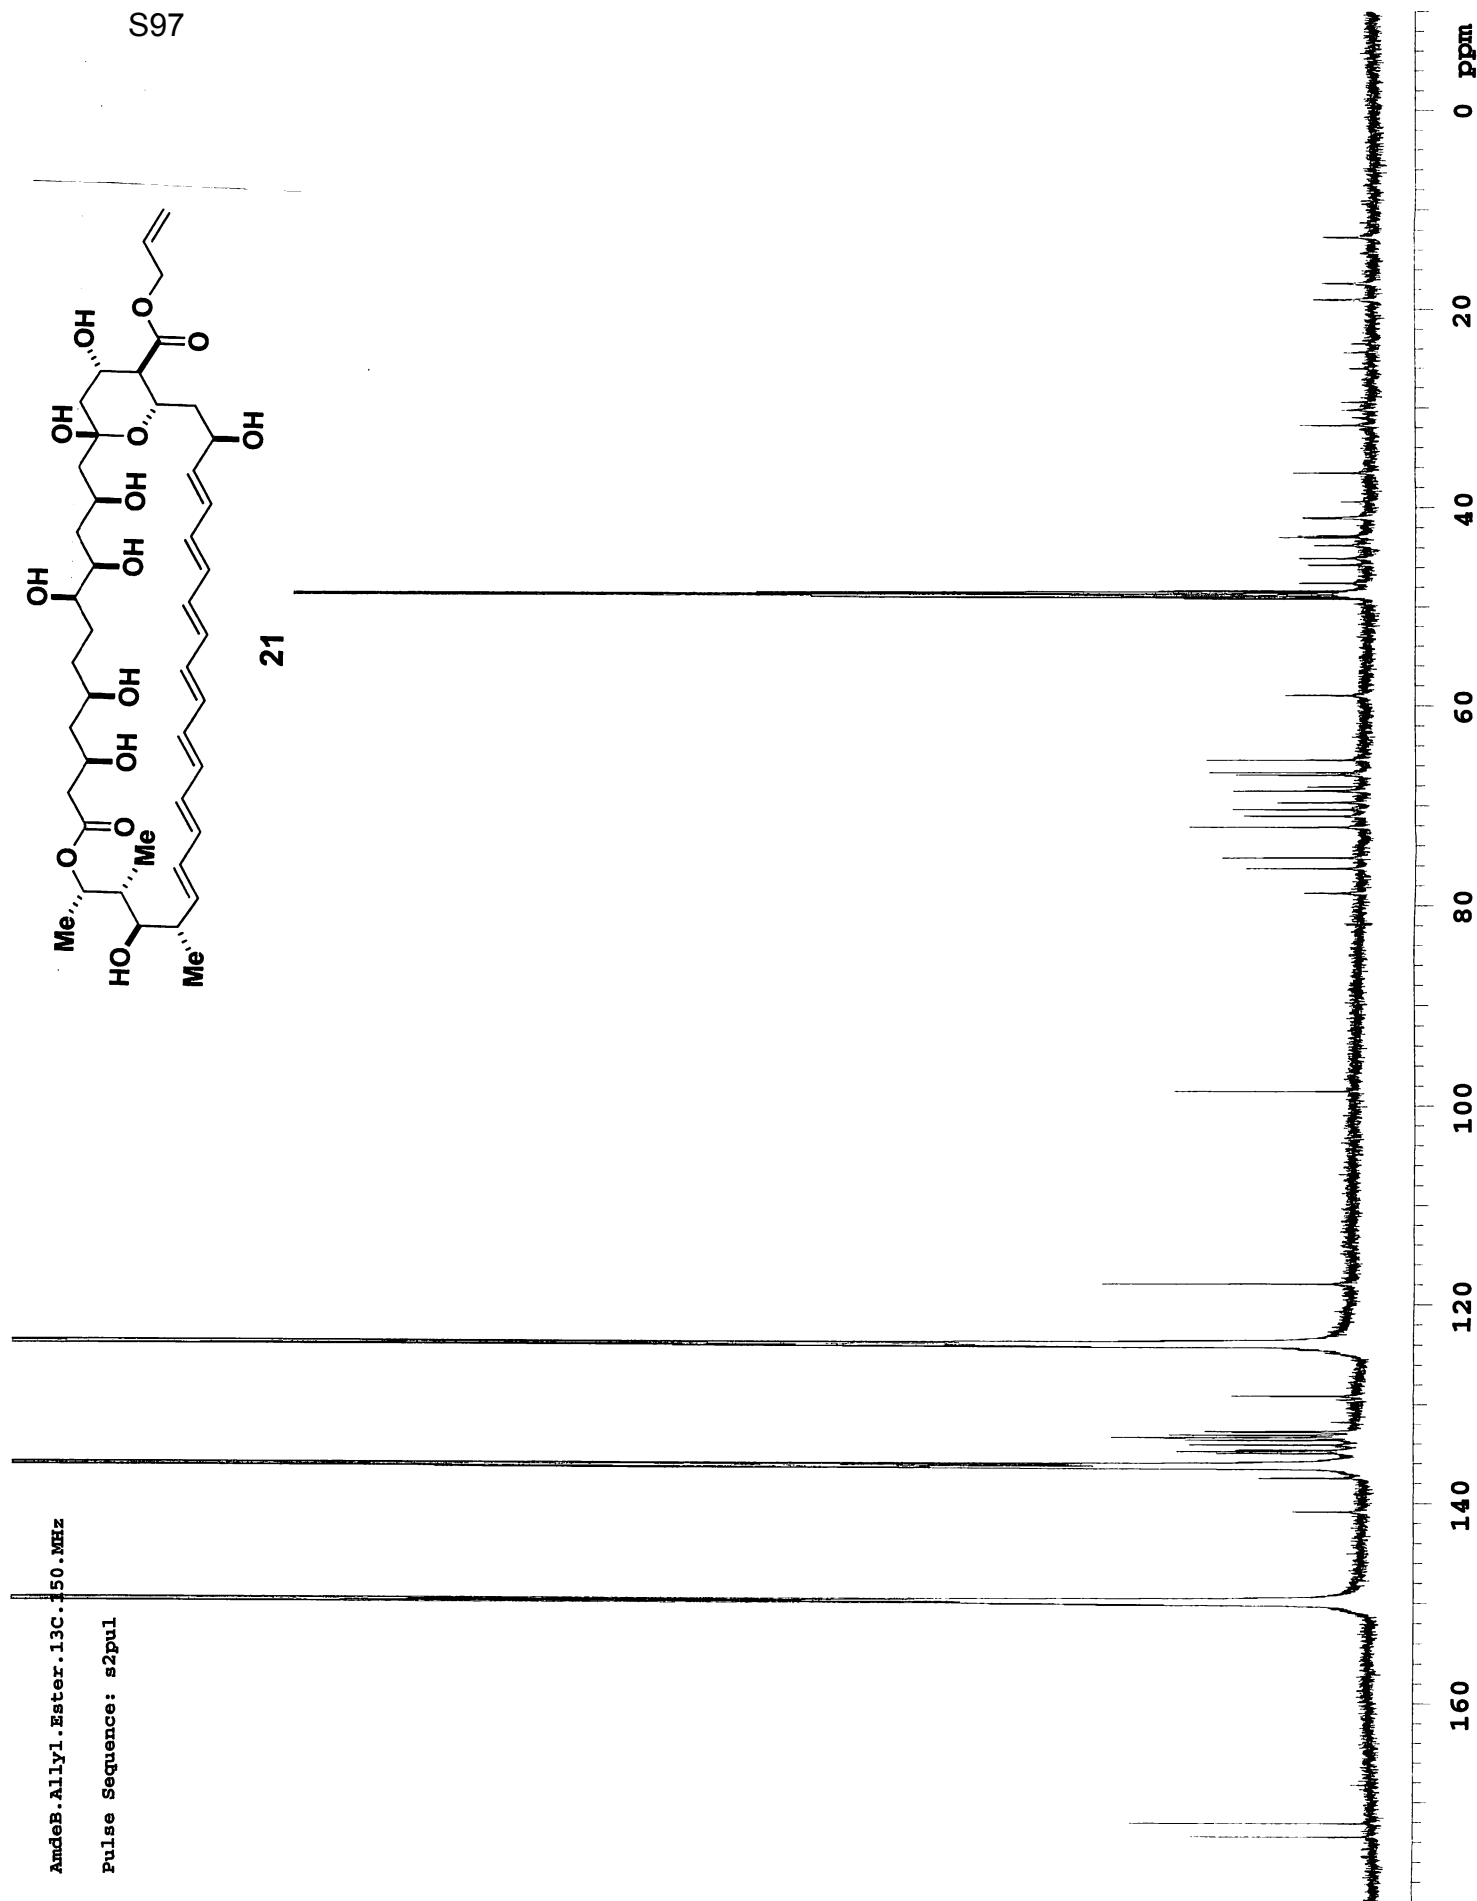

Amphoteronolide.B.Allyl.Ester.gCOSY

Pulse Sequence: gcosy

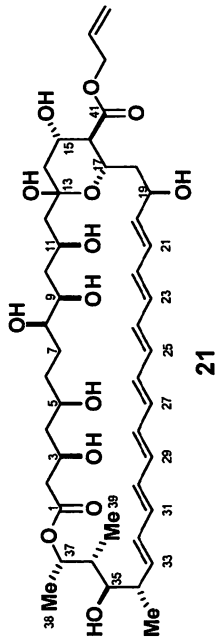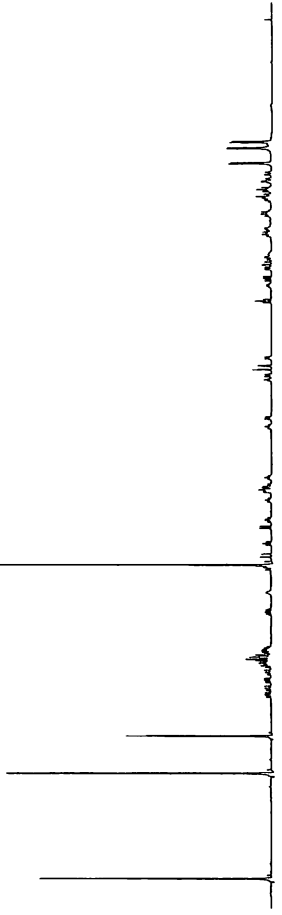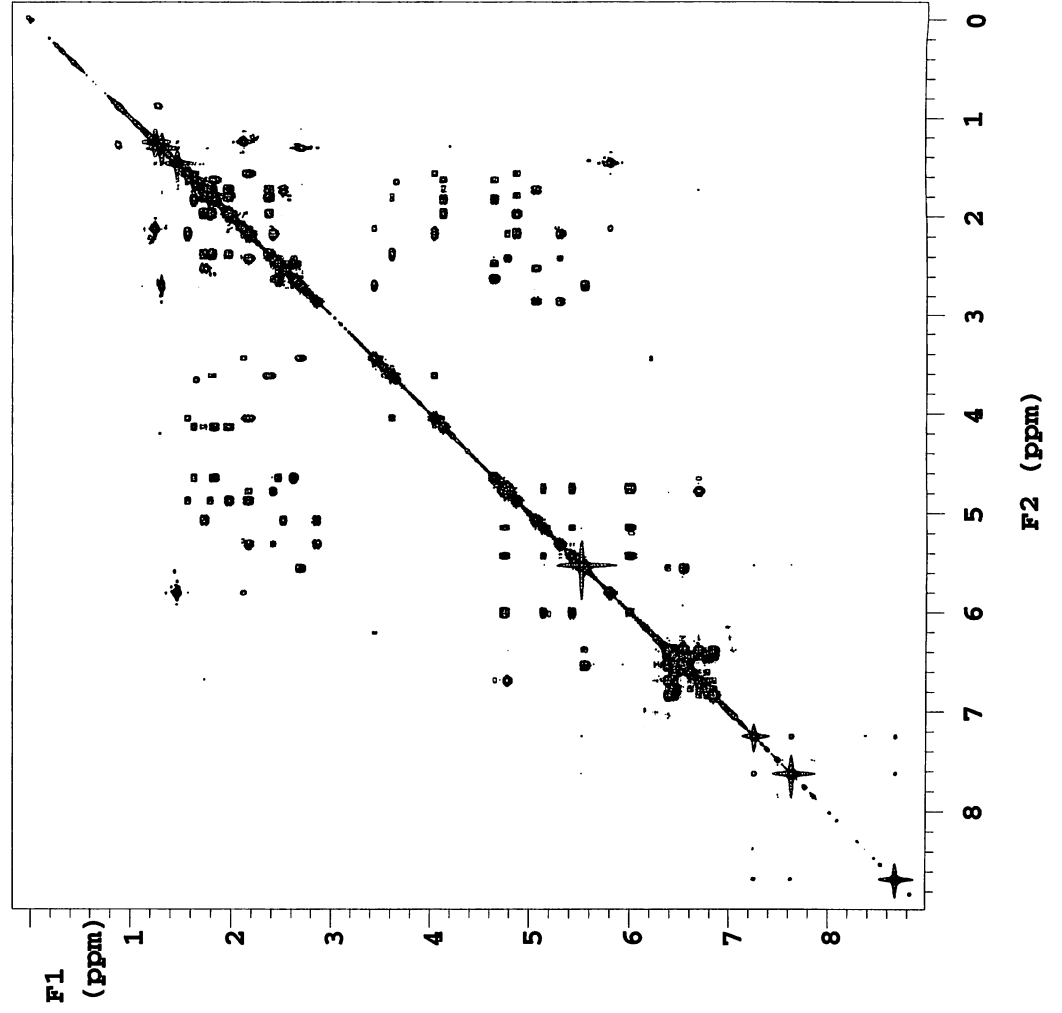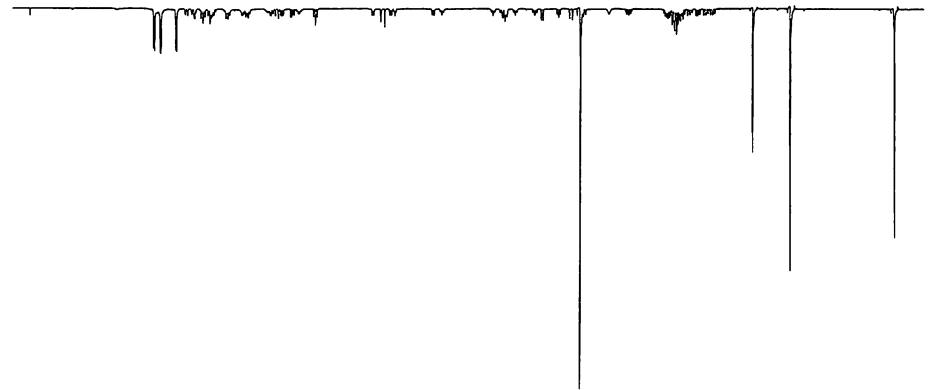

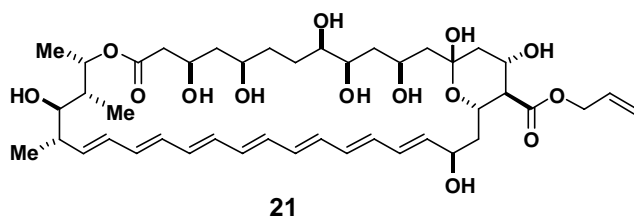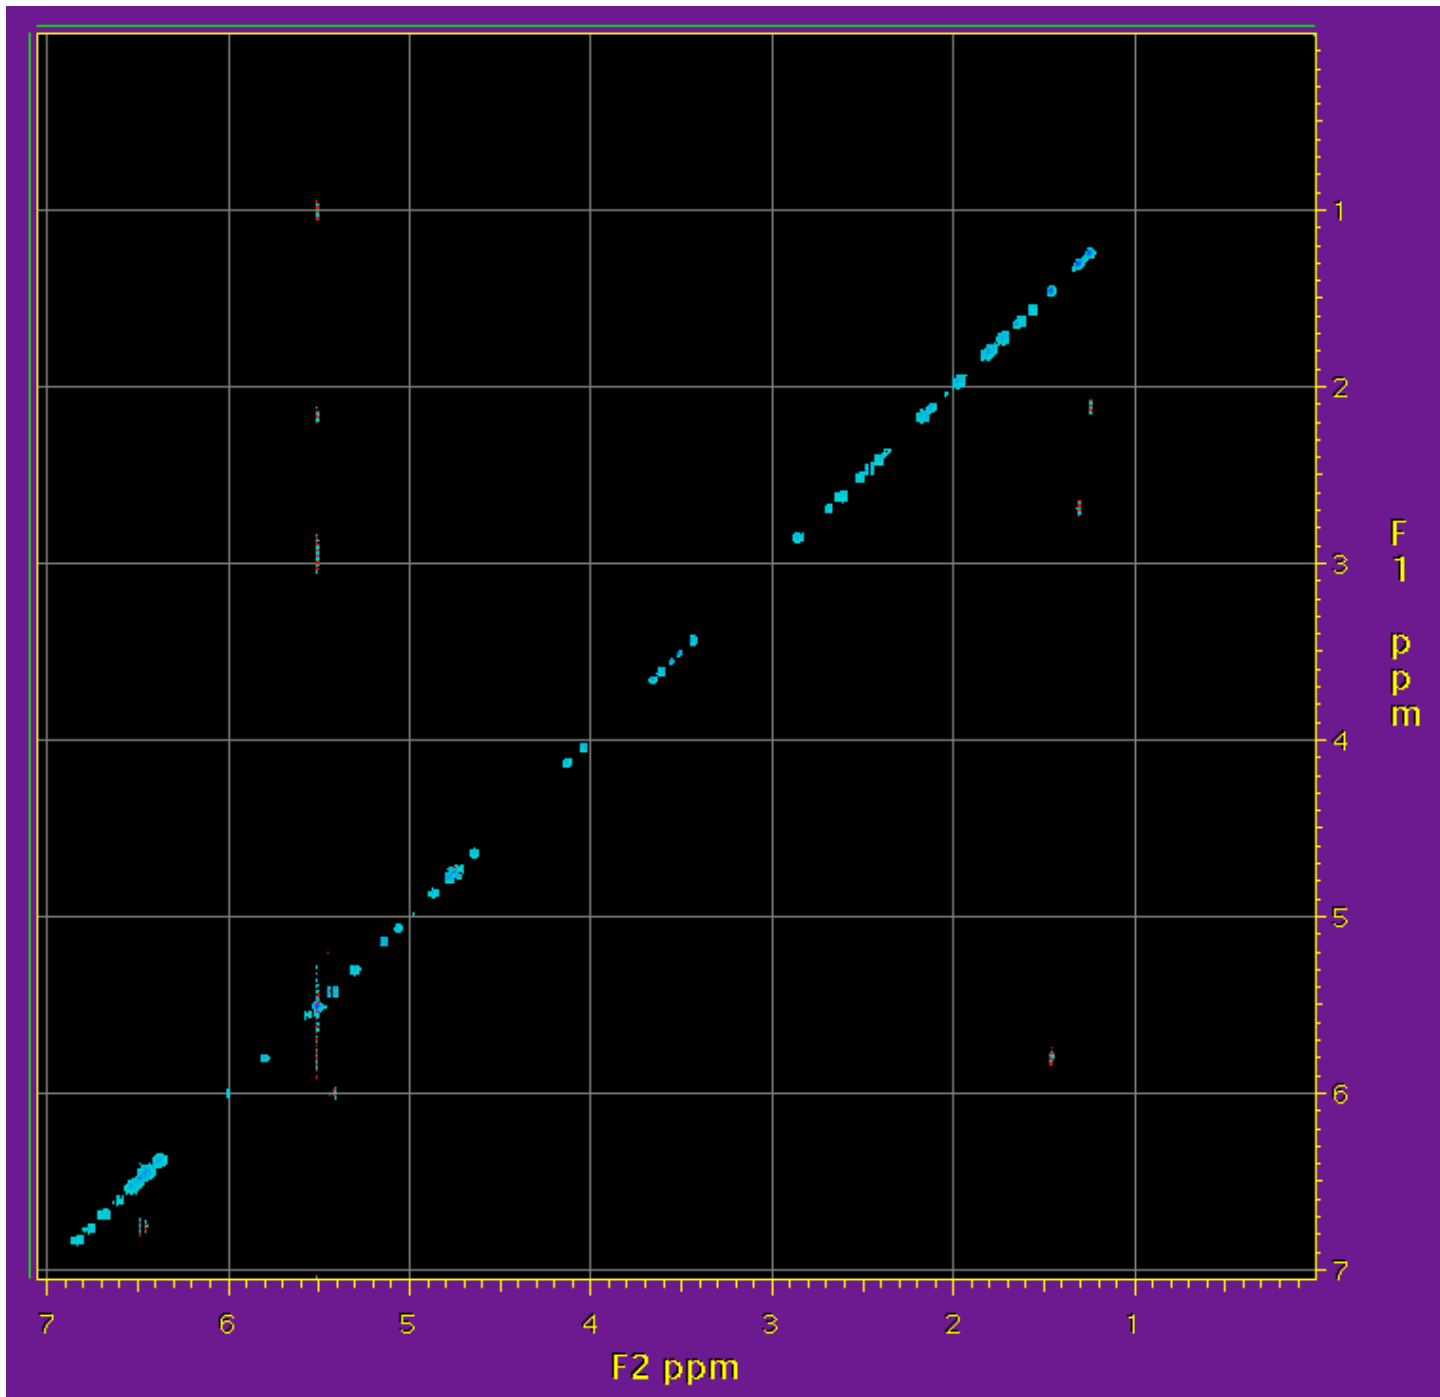

600 MHz diagonal COSYPS spectrum of 21



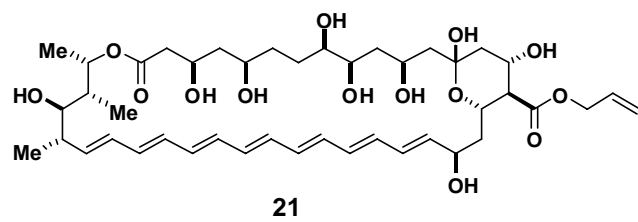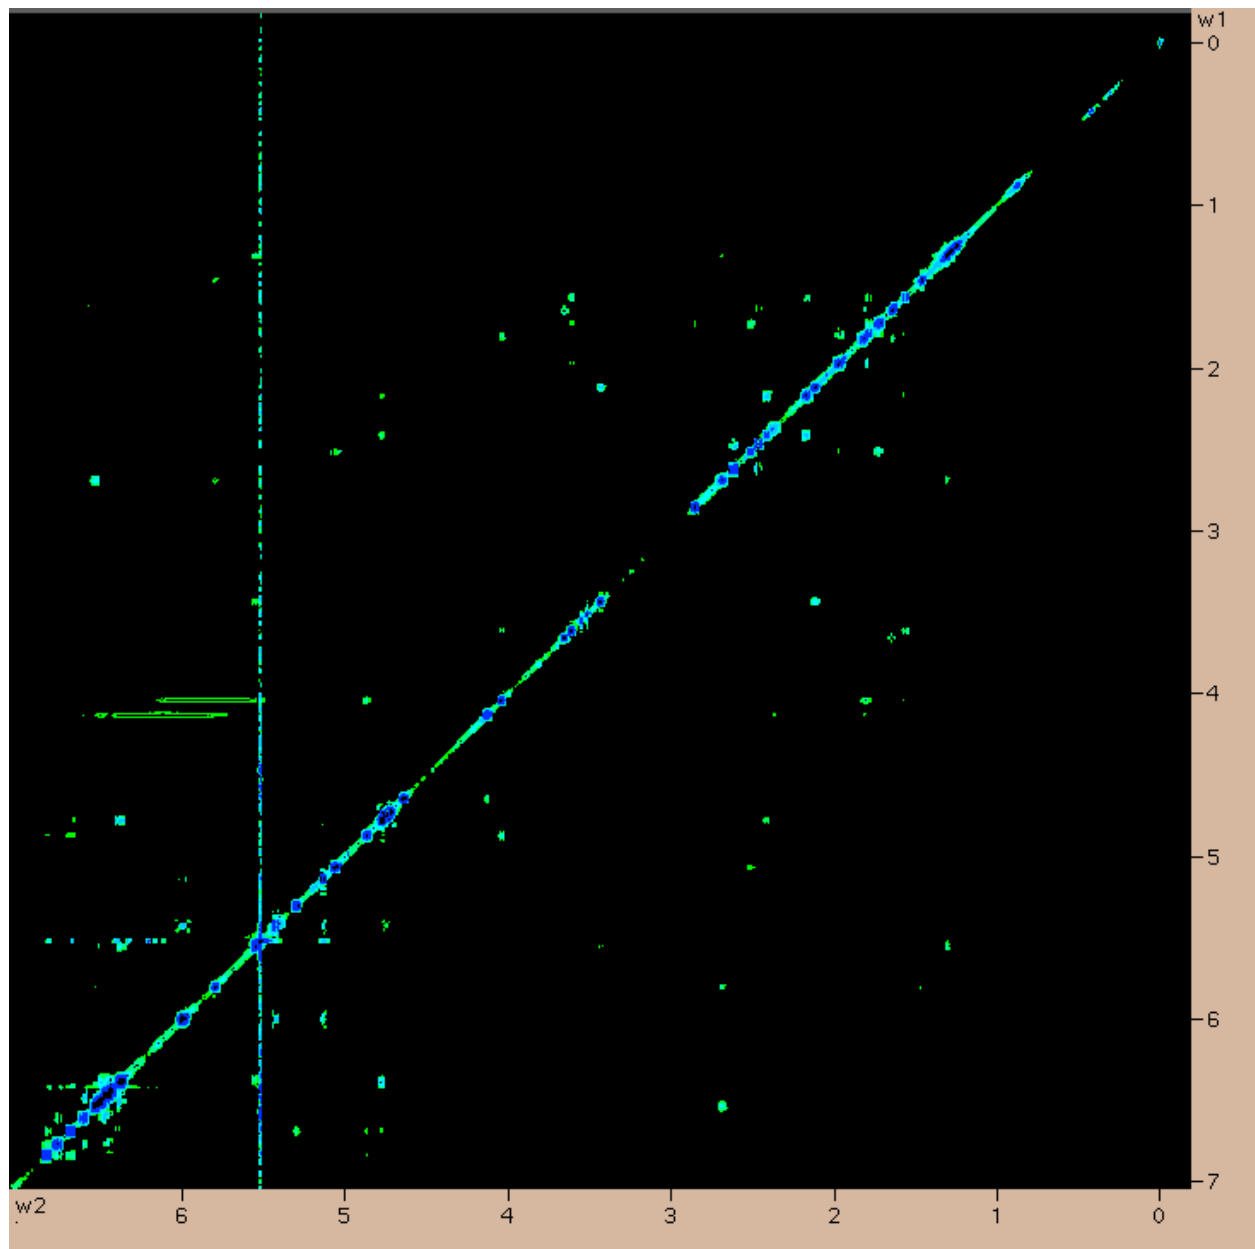

600 MHz NOESY Spectrum of 21



## STANDARD PROTON PARAMETERS

Pulse Sequence: s2pul  
 Solvent: CD3OD  
 Ambient temperature  
 File: dsp.61c.1h  
 INOVA-500 "ui500nb"

Pulse 90.0 degrees  
 Acq. time 4.096 sec  
 Width 8000.0 Hz  
 32 repetitions  
 OBSERVE H1, 500.0749485 MHz  
 DATA PROCESSING  
 Line broadening 0.3 Hz  
 FT size 262144  
 Total time 8 min, 45 sec

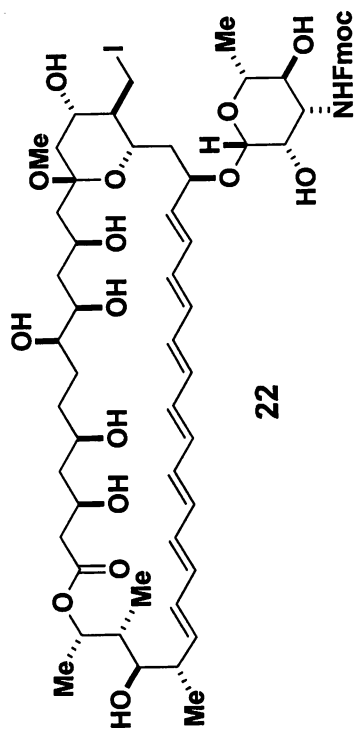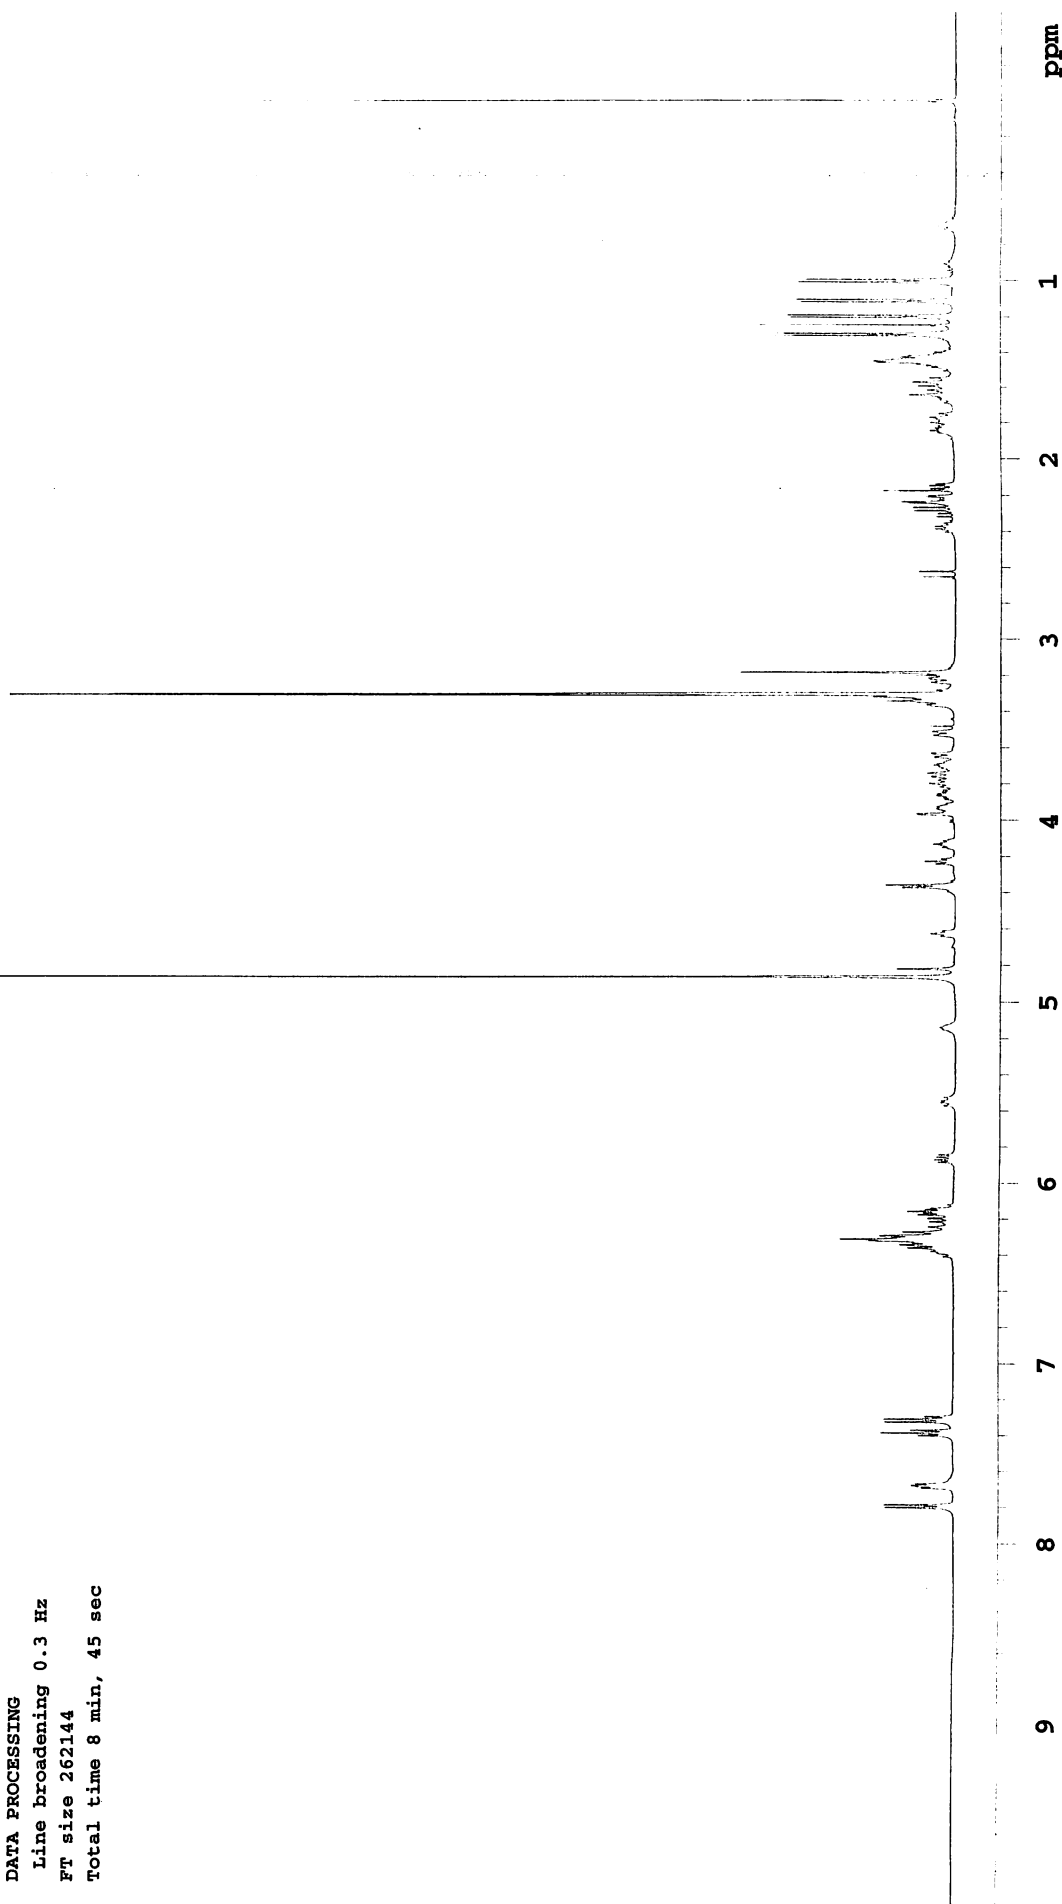

## STANDARD CARBON PARAMETERS

Pulse Sequence: s2pul

Solvent: CD3OD

Ambient temperature

User: 1-14-87

INOVA-500 "vxr500"

Relax. delay 1.000 sec

Pulse 53.3 degrees

Acq. time 0.511 sec

Width 32051.3 Hz

21408 repetitions

OBSERVE C13, 125.5820637 ME

DECOUPLE H1, 499.4335315 MHz

Power 44 dB

continuously on

WALTZ-16 modulated

DATA PROCESSING

Line broadening 1.0 Hz

Ft size 131072

Total time 42 hr, 13 min, 28 sec

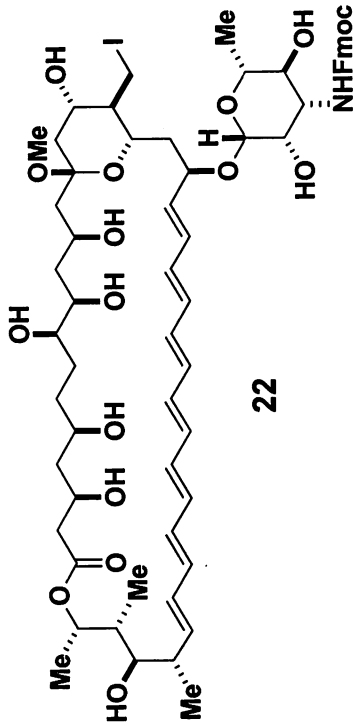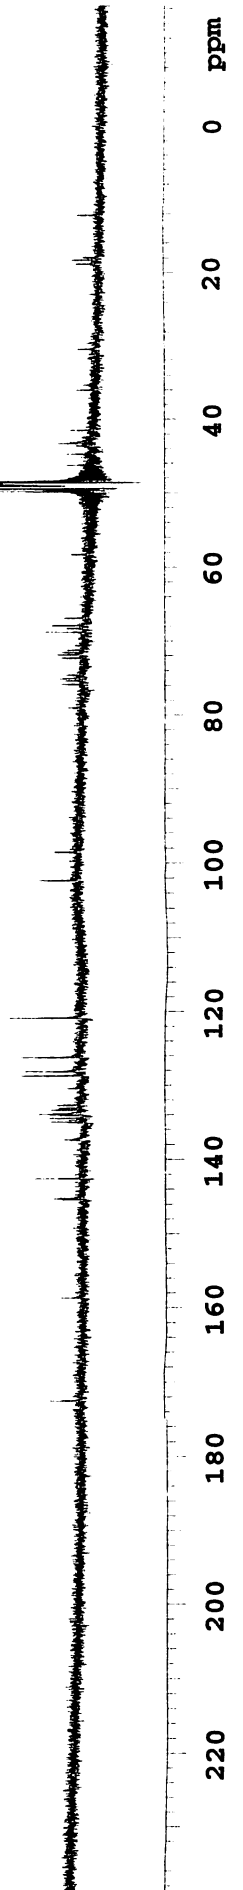

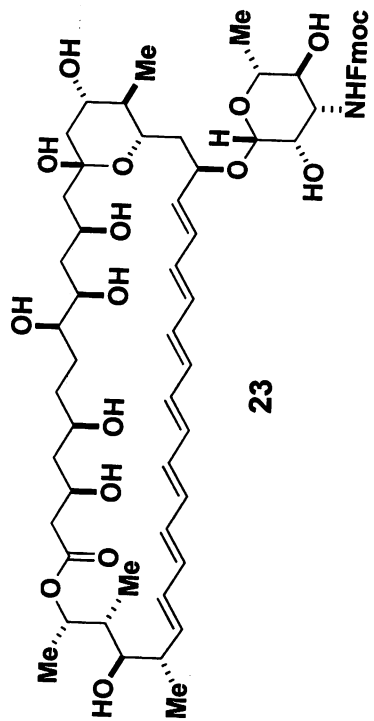

STANDARD 1H PARAMETERS

Pulse Sequence: s2pul

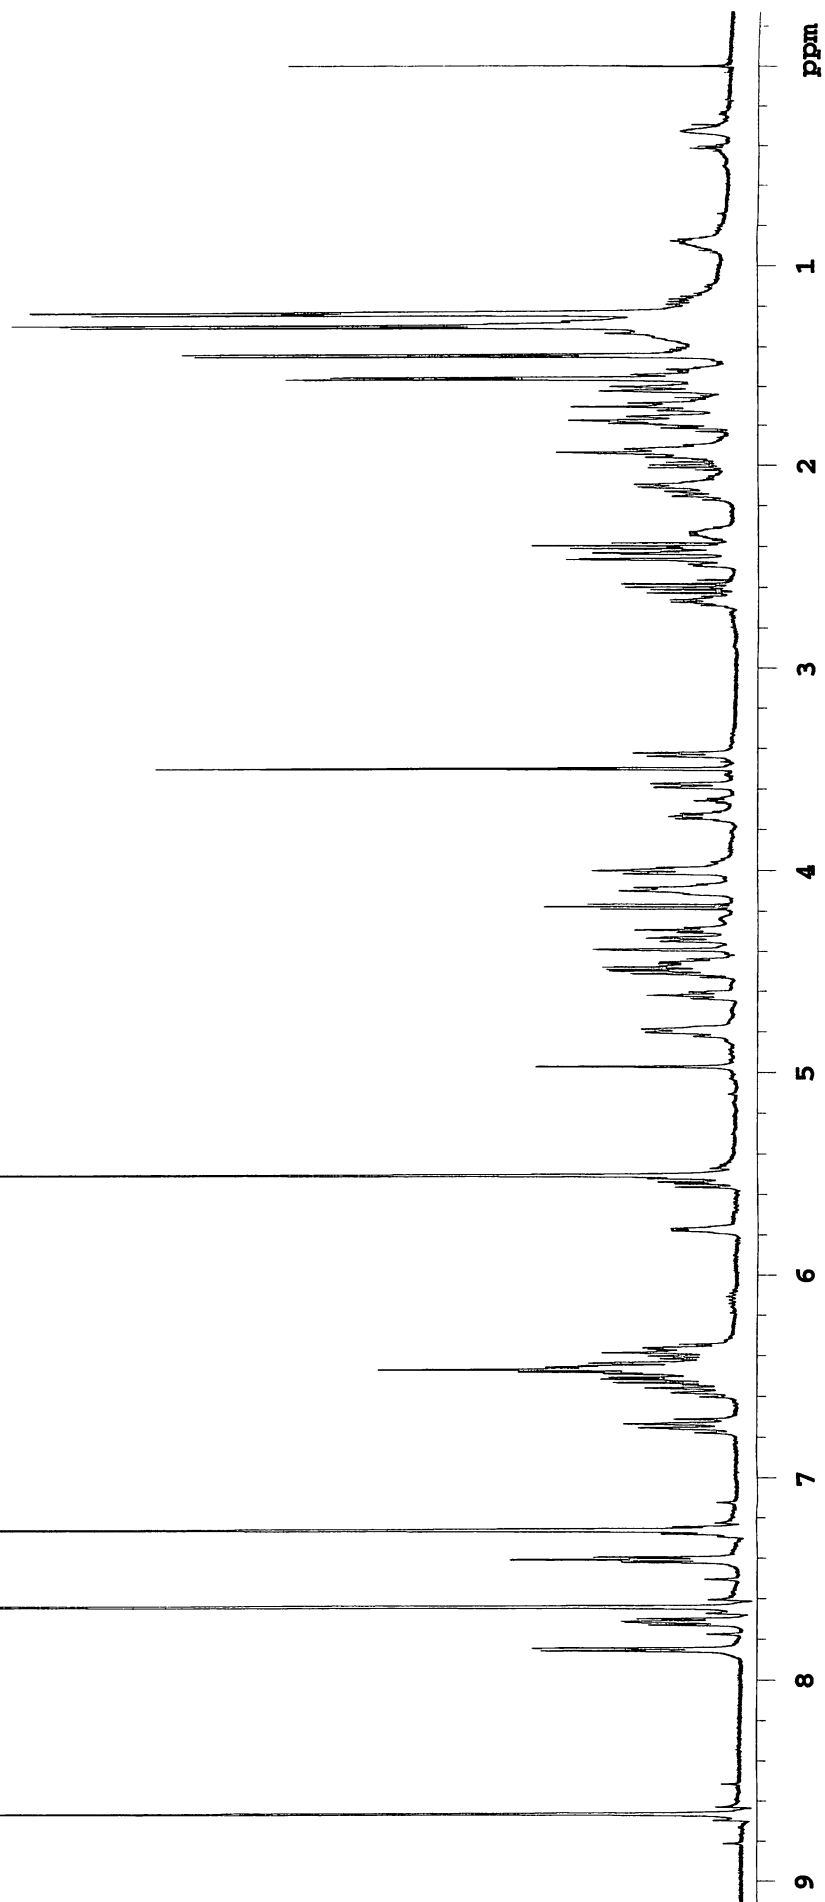



N-Fmoc-Me-AmB-gCOSY, 600 MHz

Pulse Sequence: gcosy

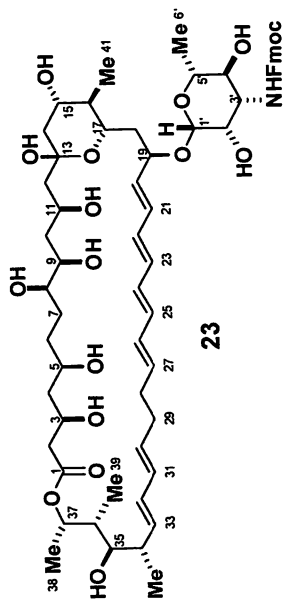

23

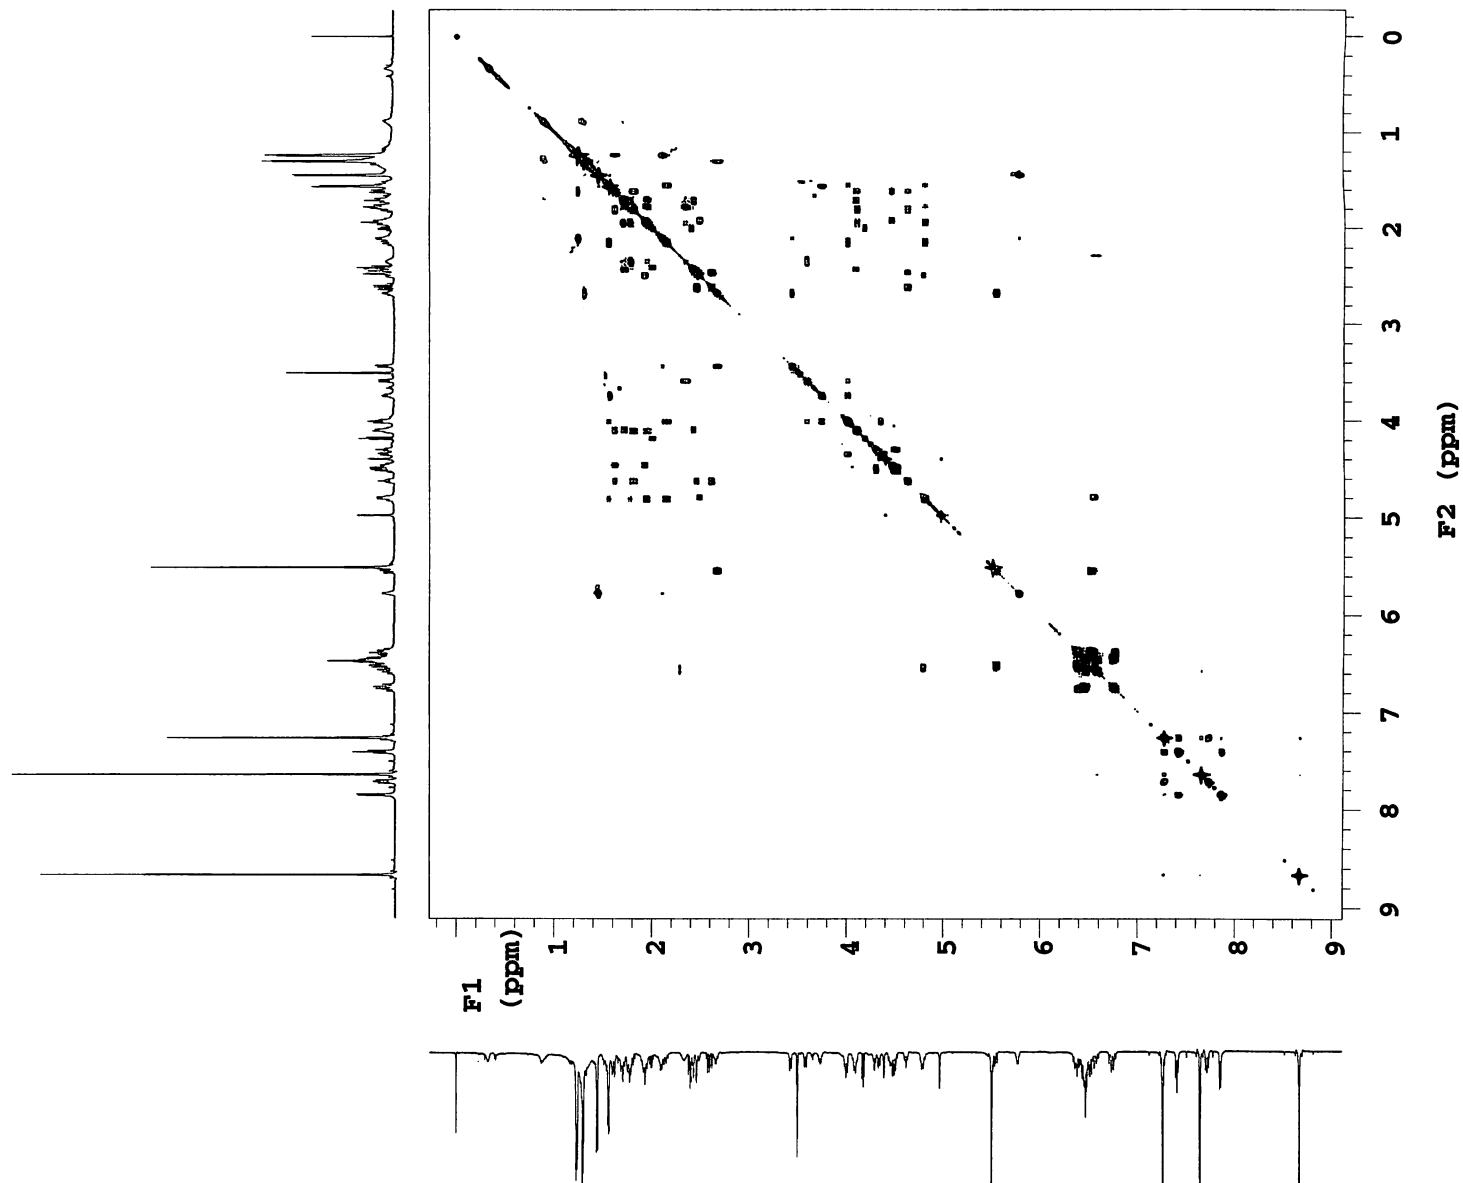

S107

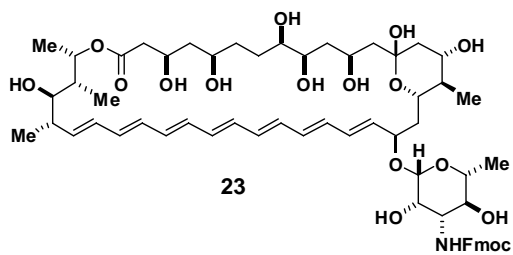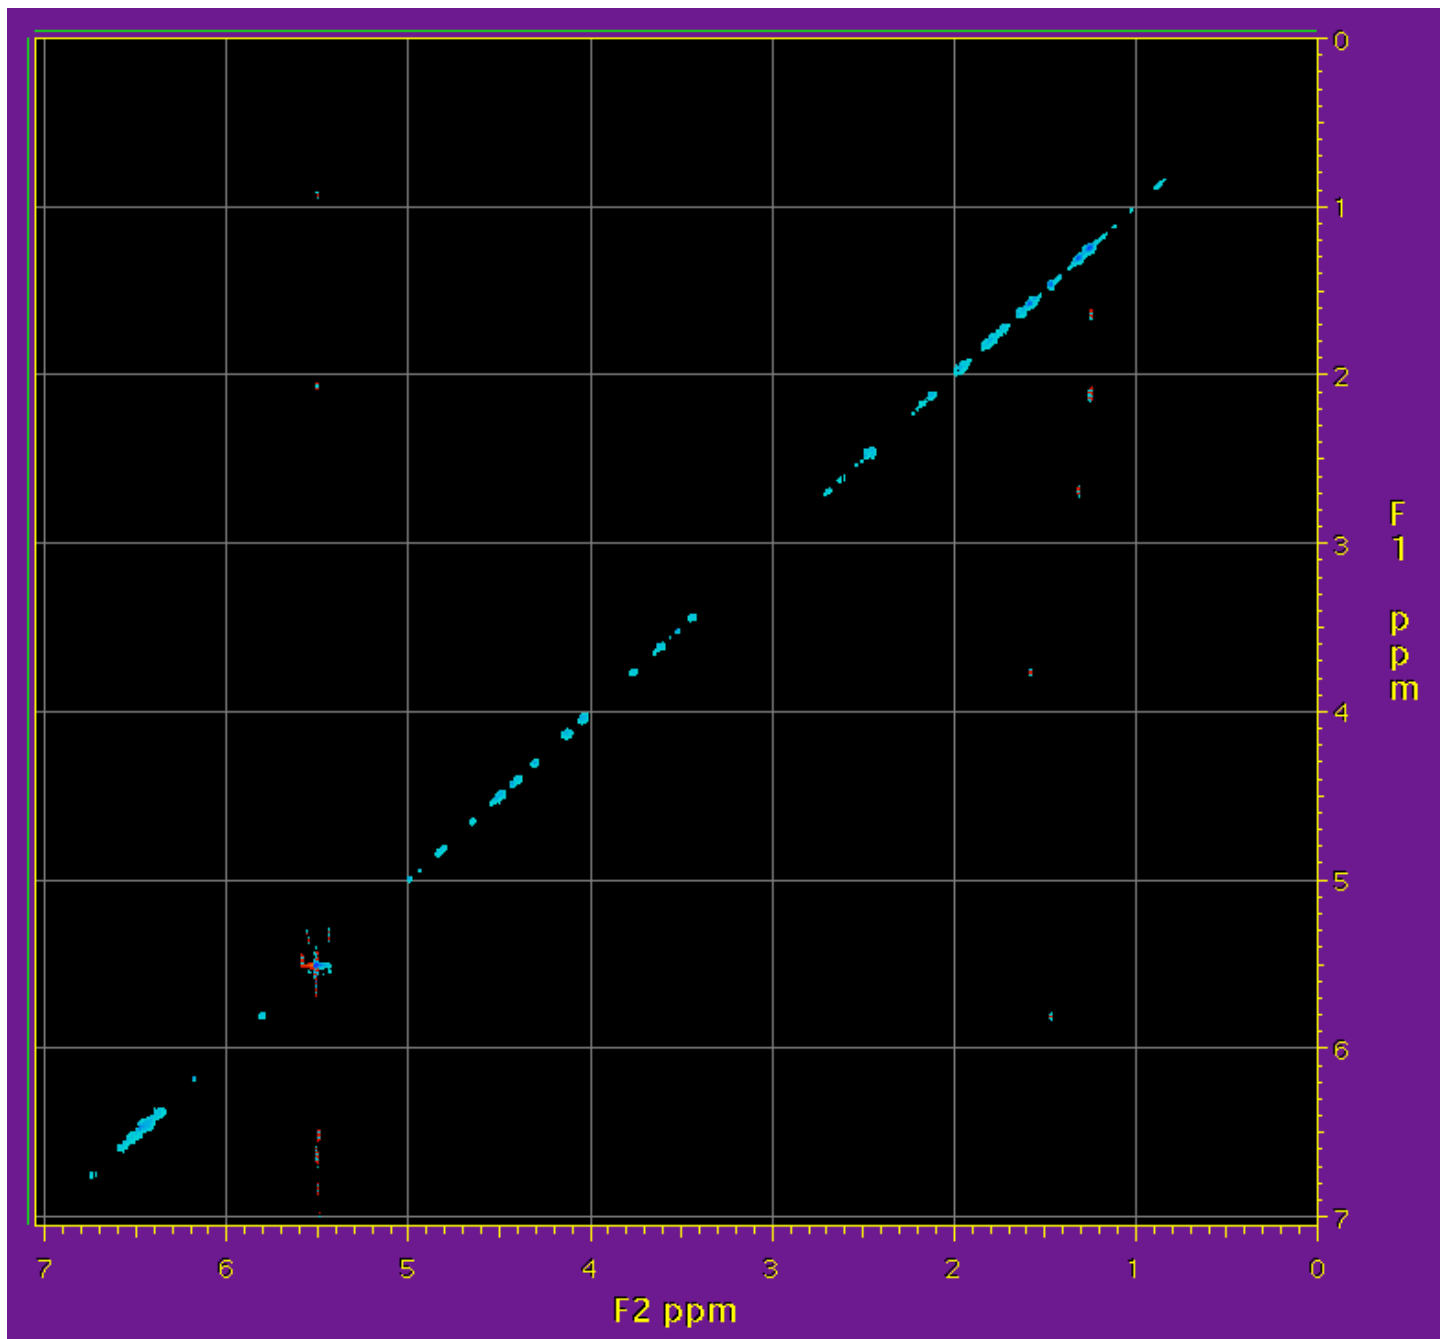

500 MHz diagonal COSYPS spectrum of 23

S108

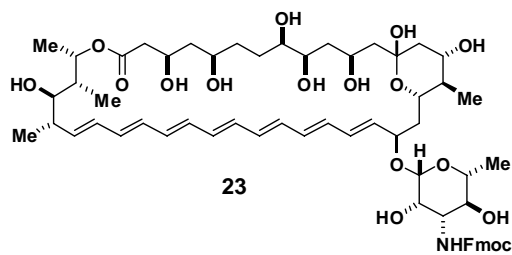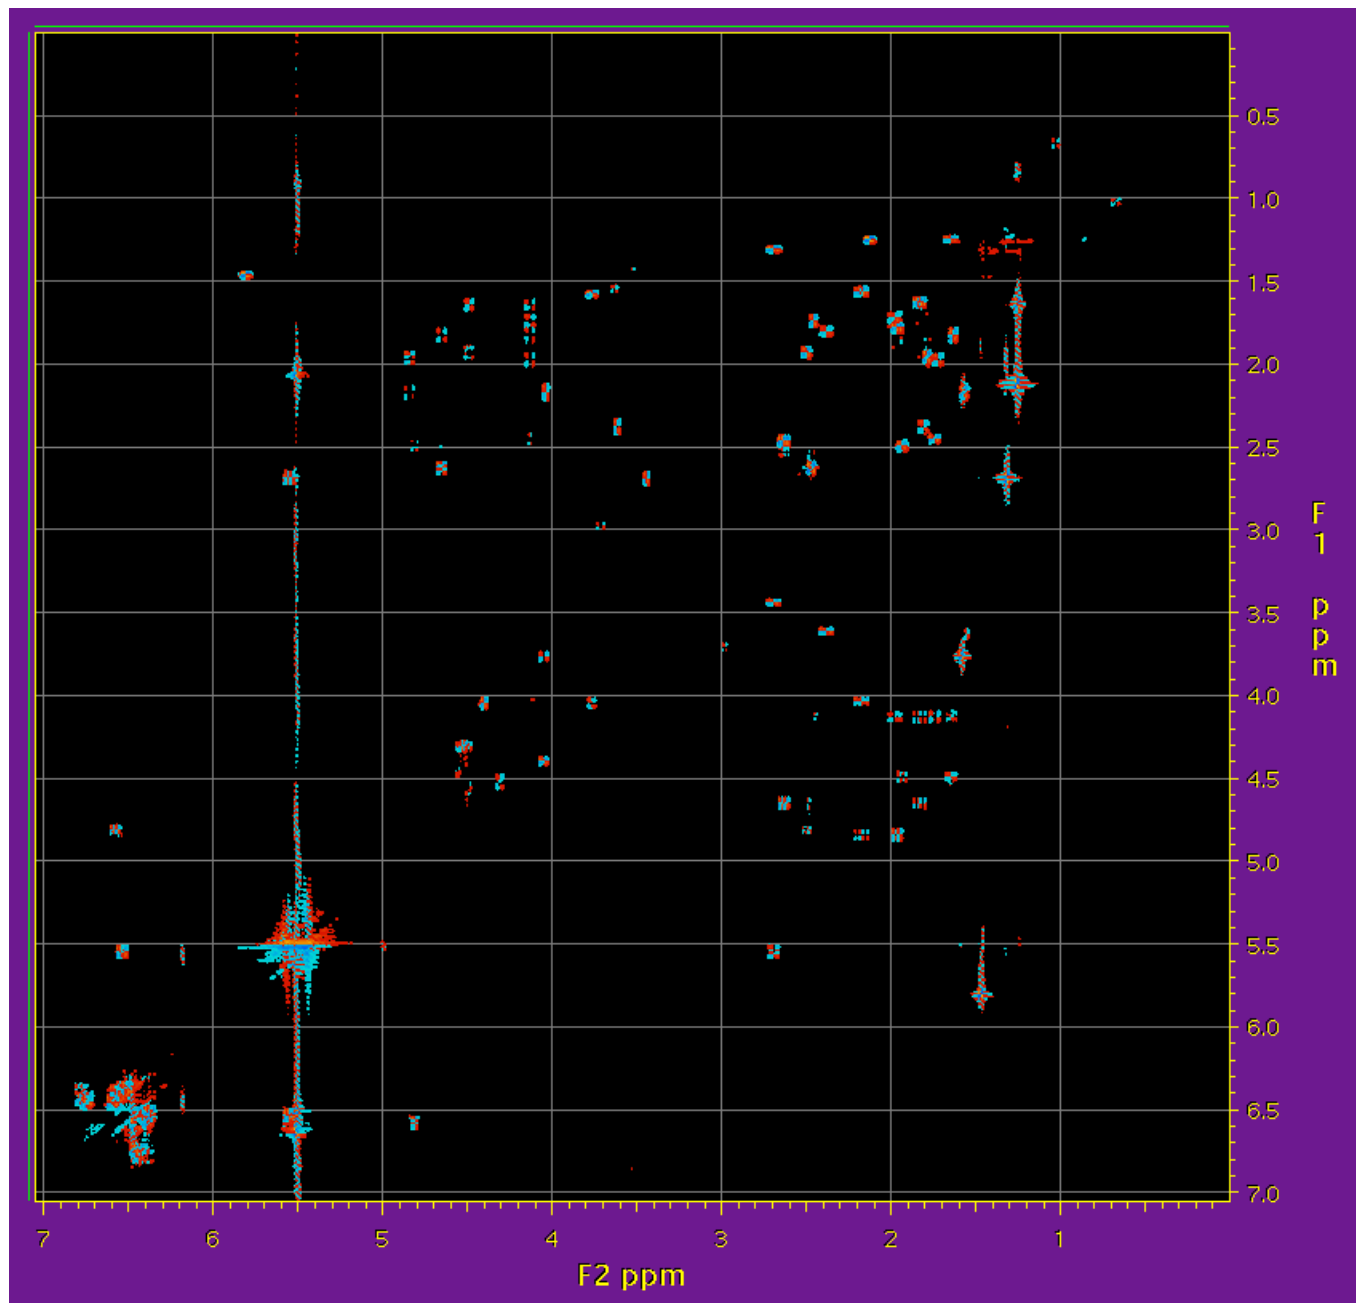

**500 MHz diagonal-suppressed COSYPS spectrum of 23**

S109

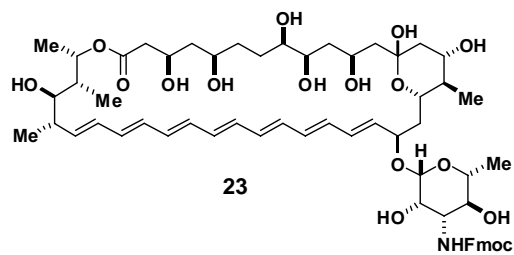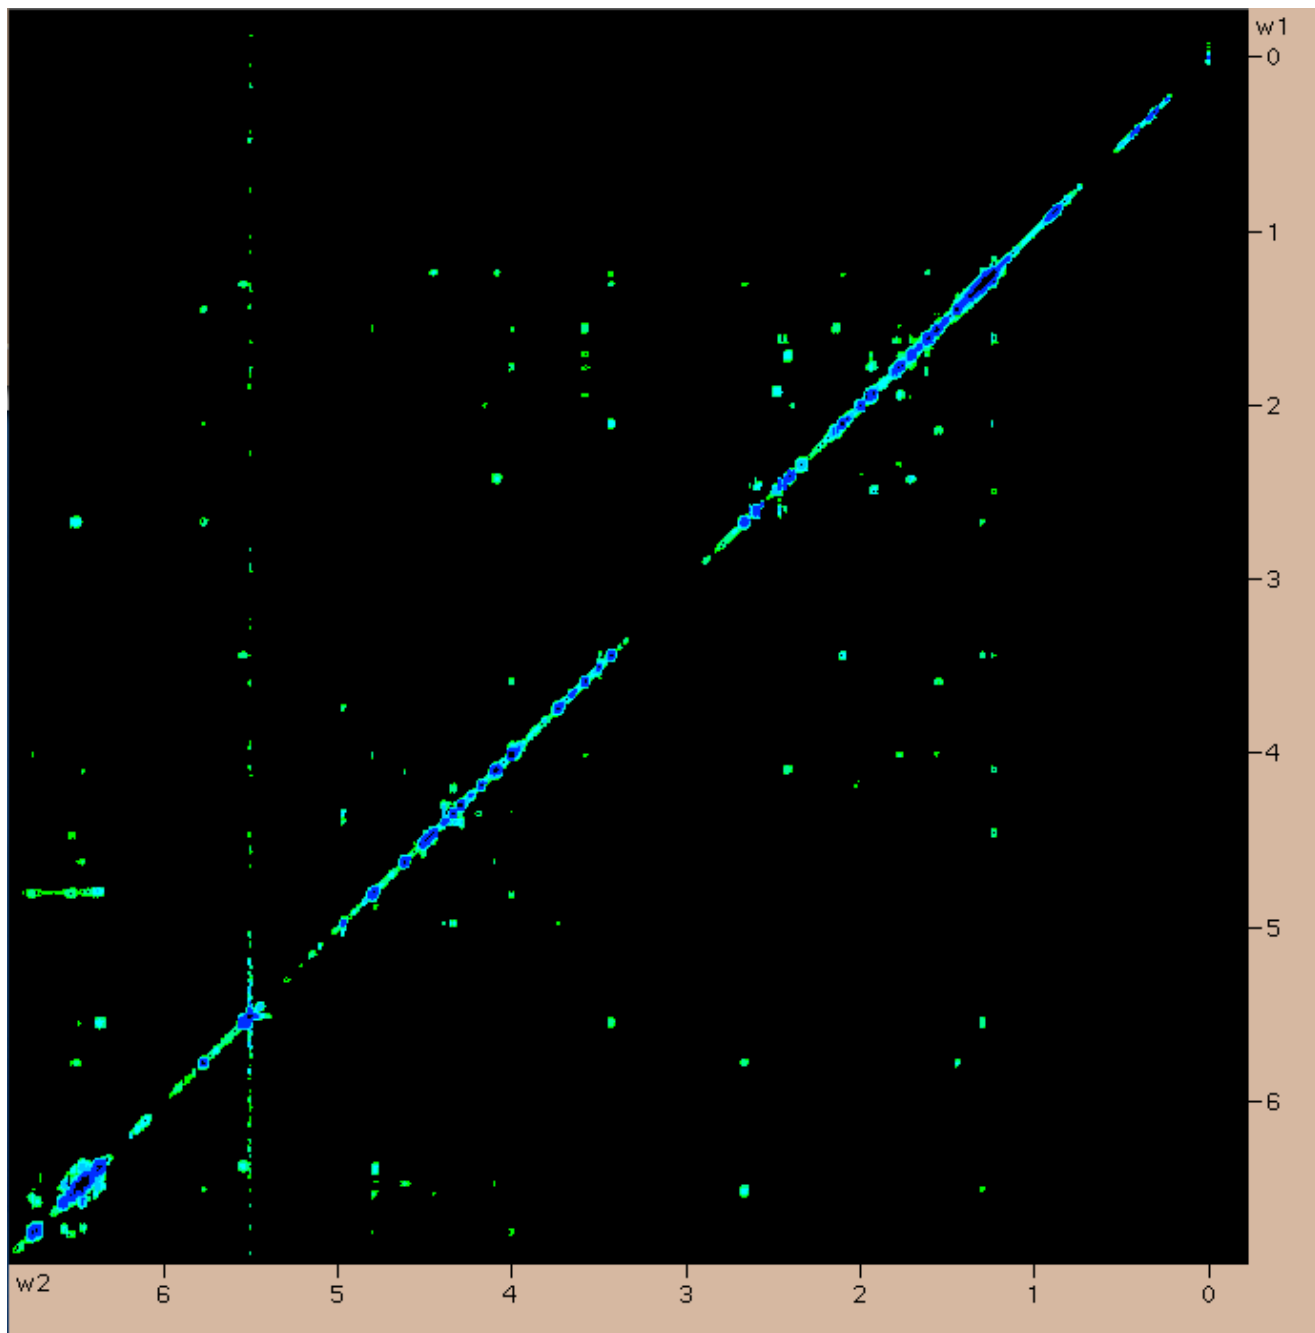

600 MHz NOESY spectrum of 23



Sample Name: AmB

S110

Acq. Operator : TMA  
 Acq. Instrument : El Chupacabra  
 Injection Date : 3/16/2007 10:33:32 AM  
 Location : Vial 1

Acq. Method : C:\  
 Last changed : 3/1  
 (mo  
 Analysis Method : C:\  
 Last changed : 7/1  
 (mo  
 Sample Info : Che

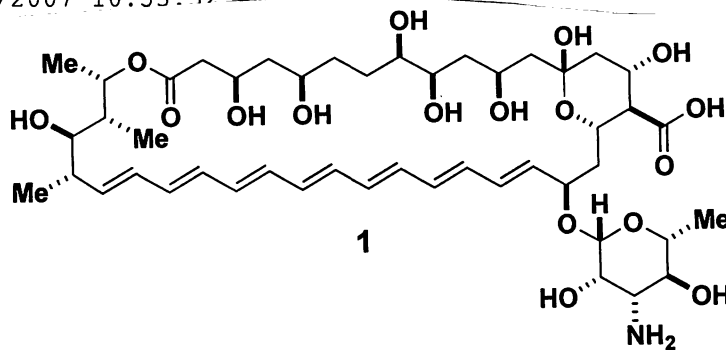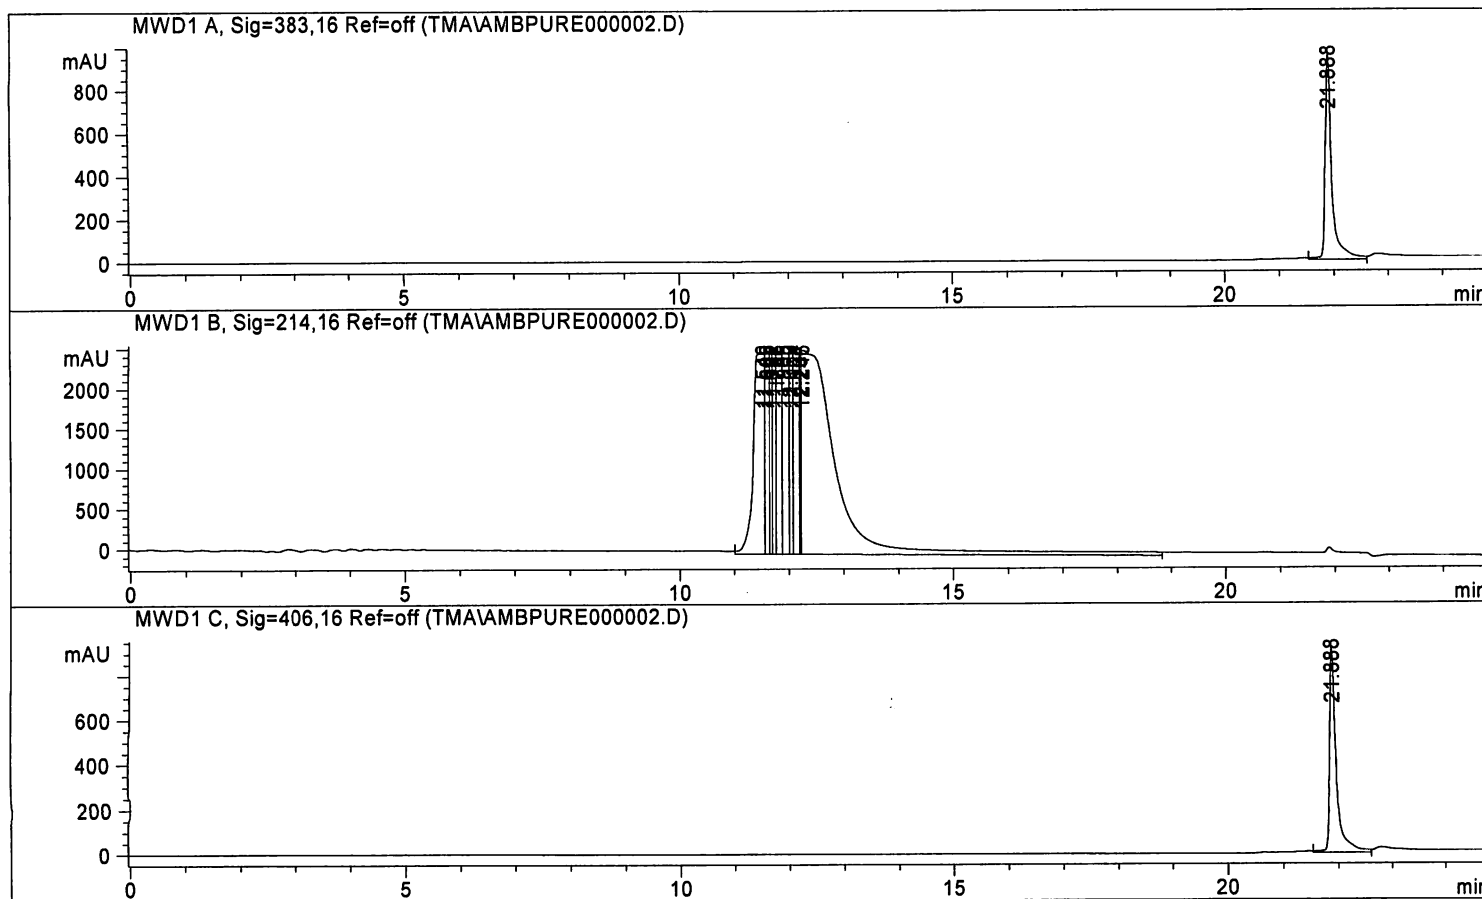

Fraction Information

Fraction collection off

No Fractions found.

```

=====
Acq. Operator   : dan
Acq. Instrument : El Cr
Injection Date  : 5/29,

Acq. Method    : C:\HI
Last changed   : 5/28,
                (mod:
Analysis Method: C:\HI
Last changed   : 7/19
                (mod:
Sample Info    :
    
```

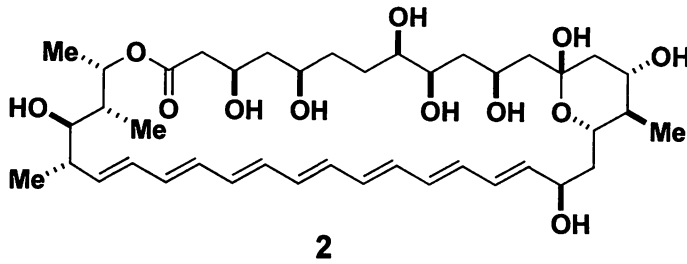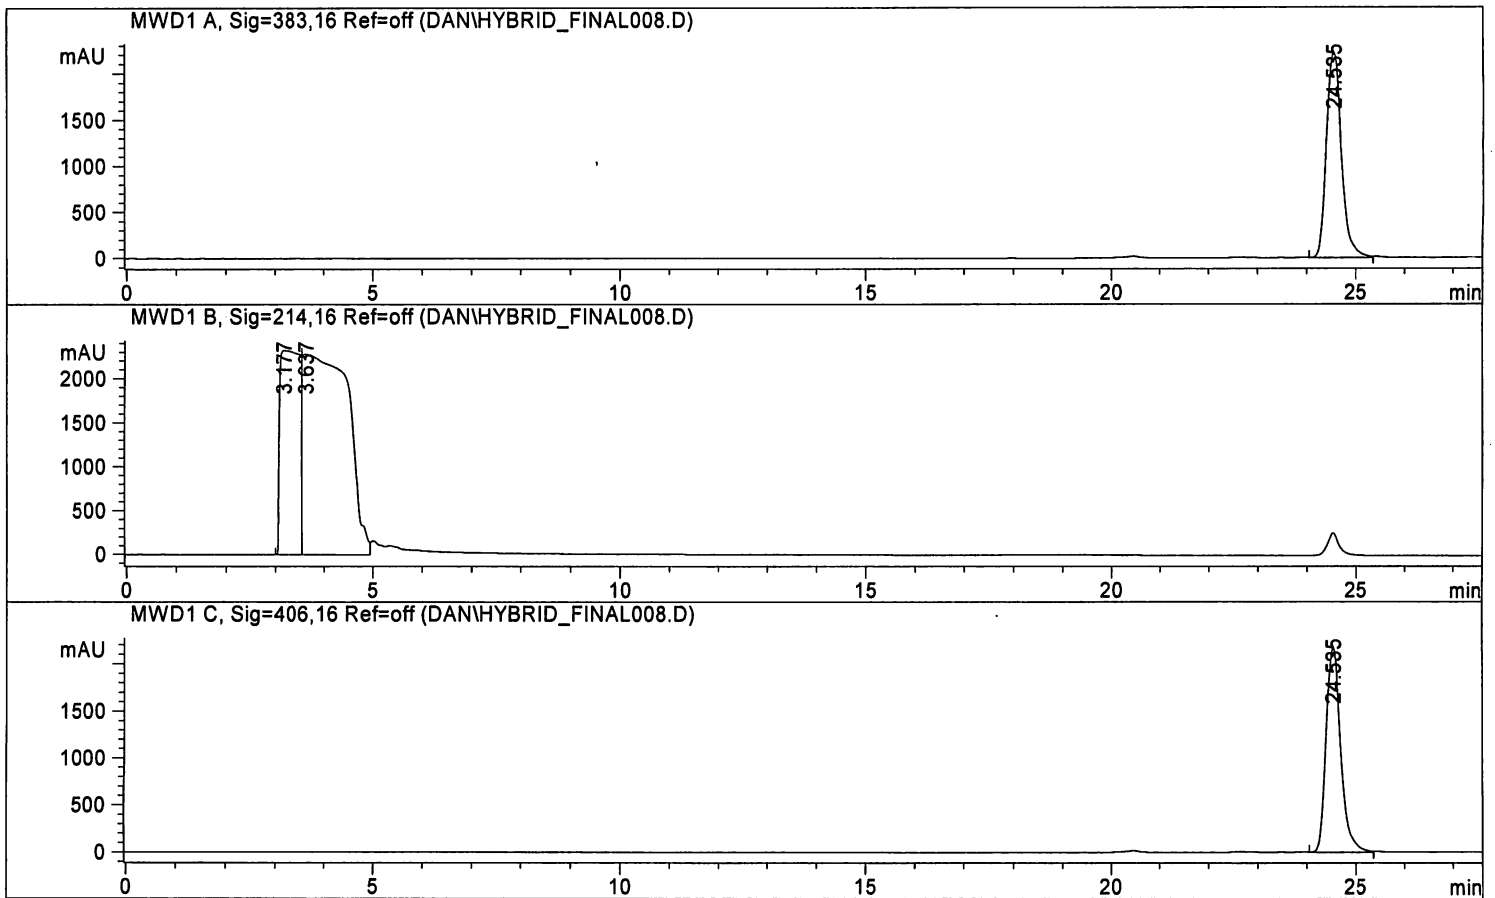

=====

Fraction Information

=====

```

=====
Fraction collection off
=====
No Fractions found.
=====
    
```

S112  
 Acq. Operator : dan  
 Acq. Instrument : El Chupacabra Location : Vial 1  
 Injection Date : 3/21,

Acq. Method : C:\H:  
 Last changed : 3/20  
 Analysis Method : C:\H:  
 Last changed : 7/19  
 (mod

Sample Info :

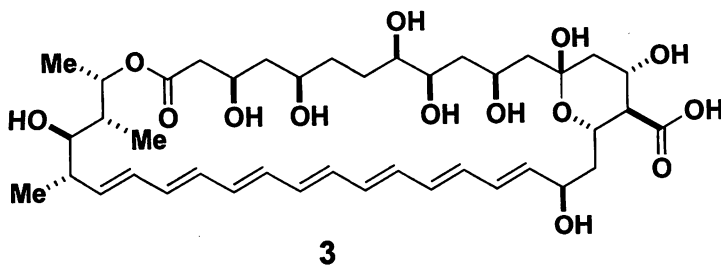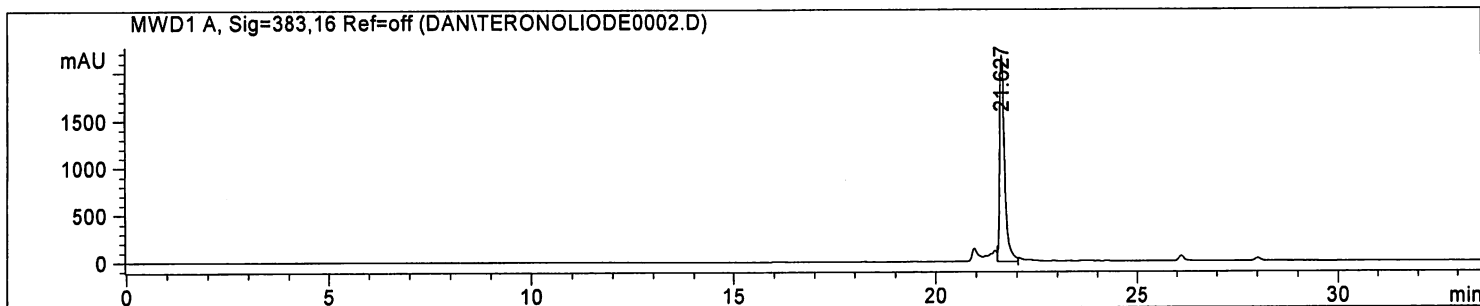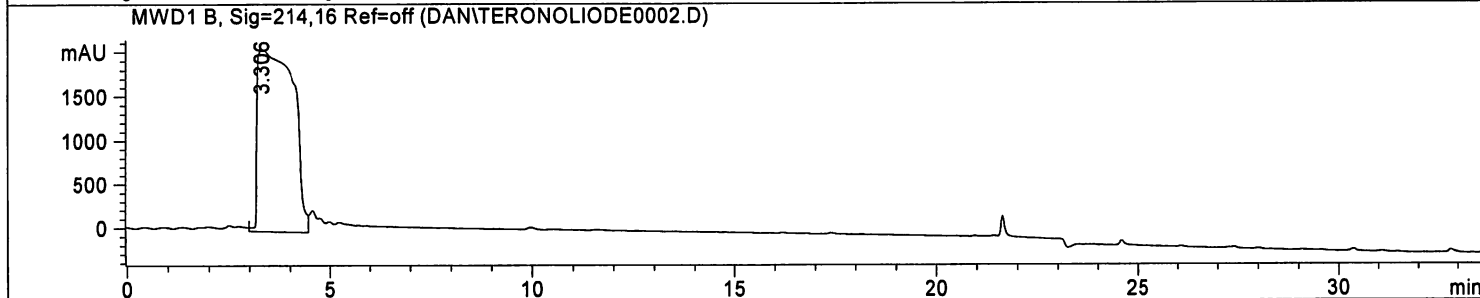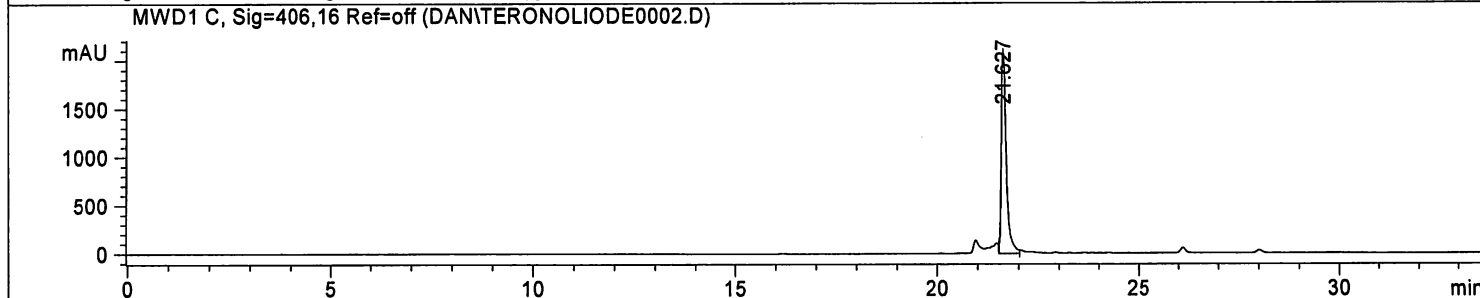

=====  
 Fraction Information  
 =====

Fraction collection off  
 =====

No Fractions found.  
 =====

=====  
 Acq. Operator : dan  
 Acq. Instrument : El  
 Injection Date :  
 Acq. Method :  
 Last changed :  
 Analysis Method :  
 Last changed :  
 Sample Info :  
 =====

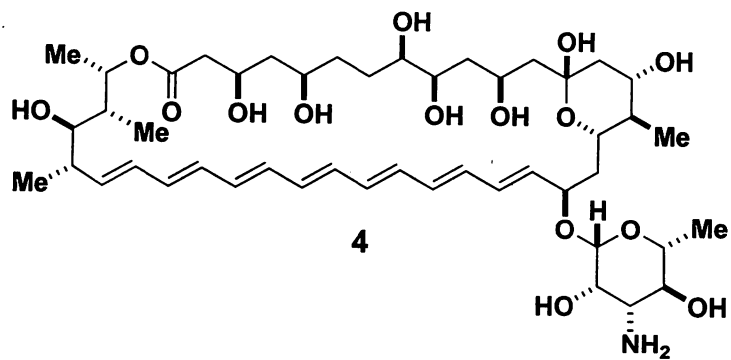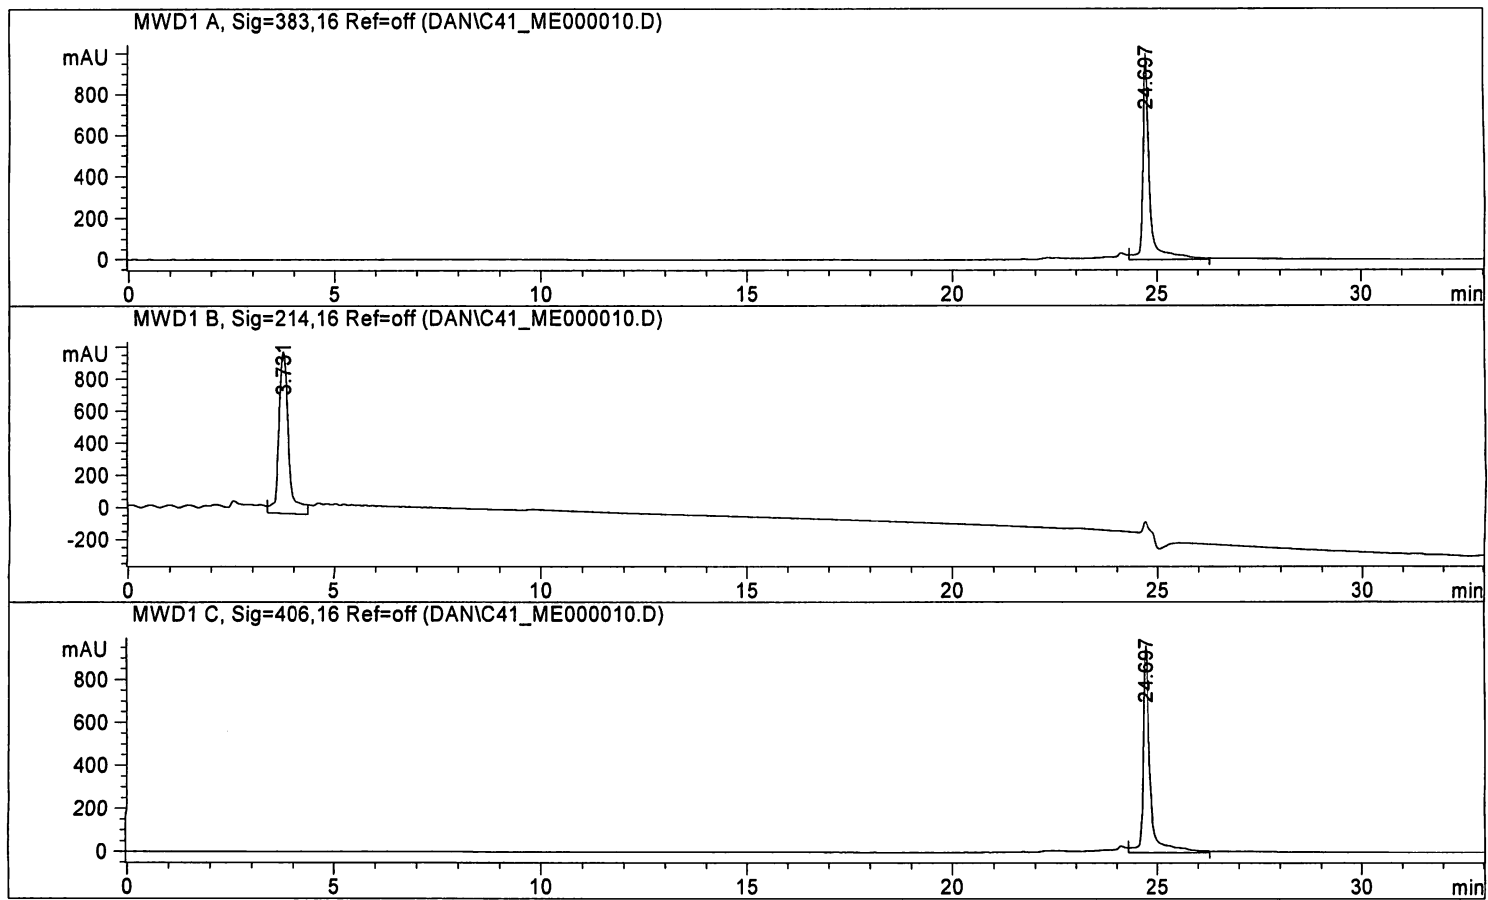

=====  
 Fraction Information  
 =====

Fraction collection off  
 =====

No Fractions found.  
 =====
